# Supplementary material
Source: MDPI journal article supplement (https://www.mdpi.com/2076-3417/7/5/514)
Supplement: s1 [file s1]

## Raw Rice Husk (Coupled TwoTheta/Theta)

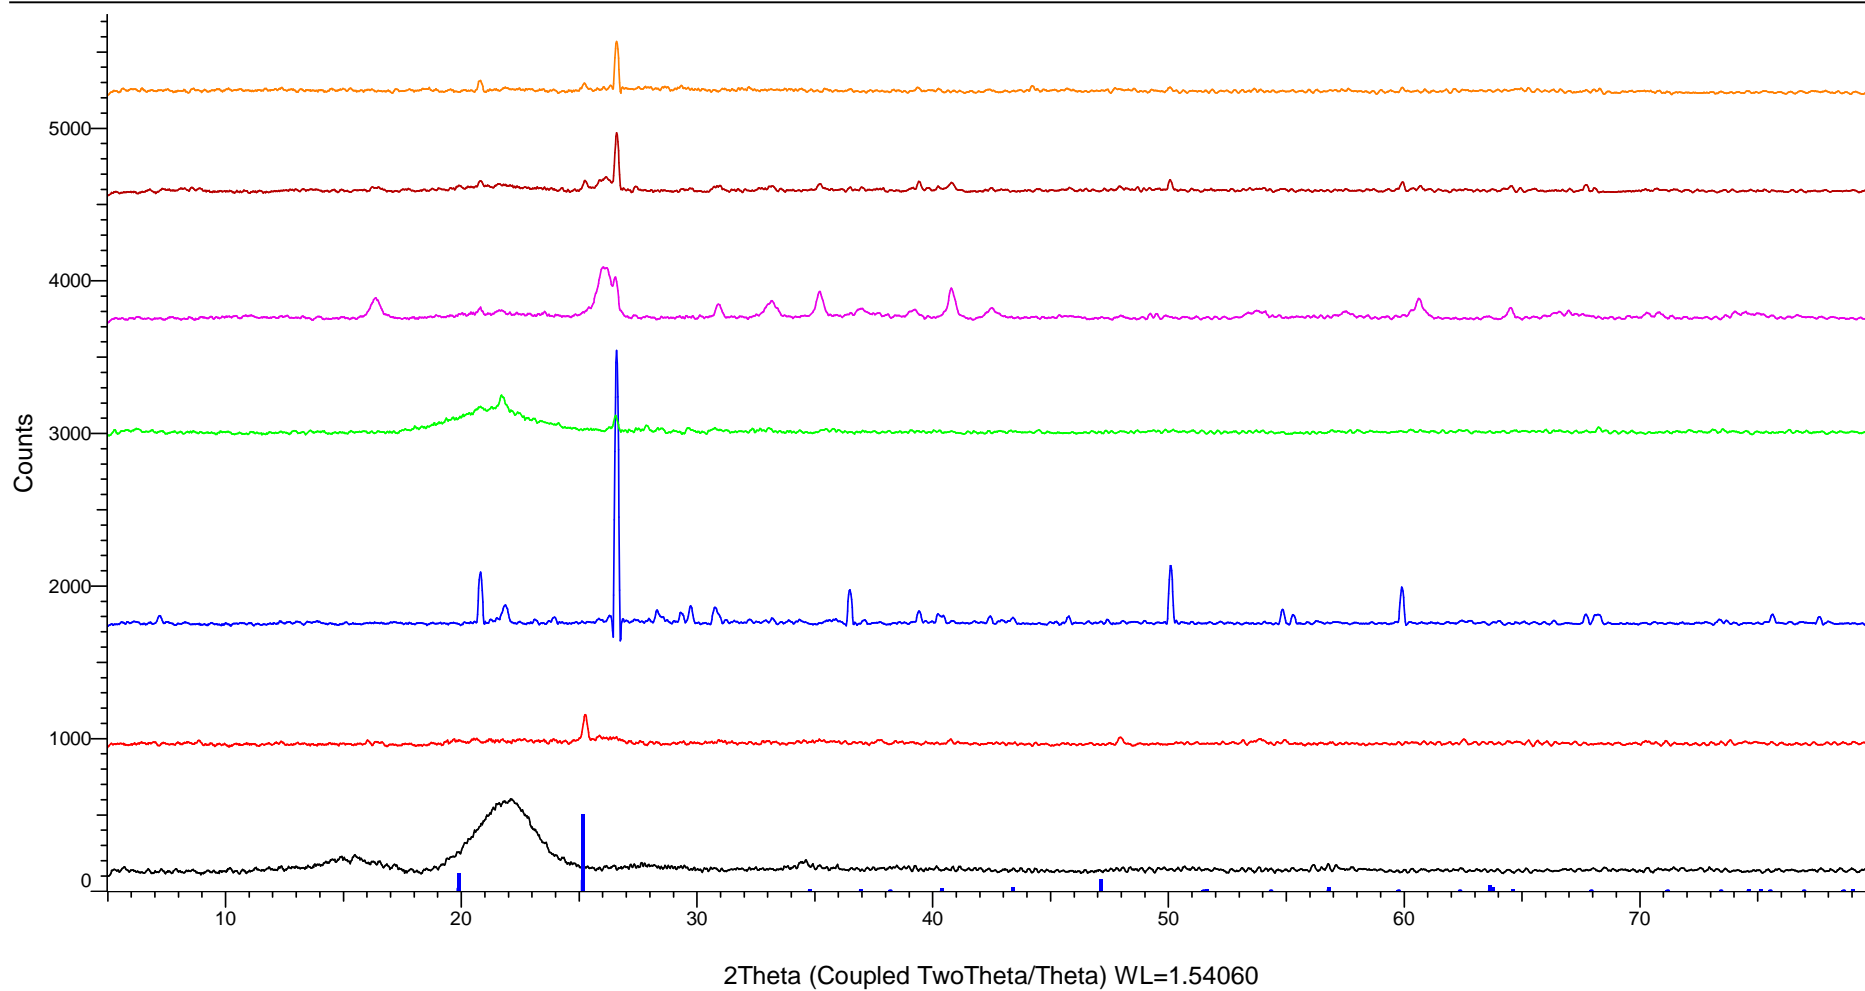

Pattern: PDF 01-080-2147 (Tune Cell)    Radiation: 1.54060    Quality:  
User modified

|                                                                                                                                                                                                                                                                                                                                                                                                                                             |  |                                                             |                                                                           |  |  |
|---------------------------------------------------------------------------------------------------------------------------------------------------------------------------------------------------------------------------------------------------------------------------------------------------------------------------------------------------------------------------------------------------------------------------------------------|--|-------------------------------------------------------------|---------------------------------------------------------------------------|--|--|
| <div>Formula<br/>Name<br/>Name (mineral)<br/>Name<br/>(common)</div>                                                                                                                                                                                                                                                                                                                                                                        |  |                                                             | Si O2<br>Silicon Oxide<br><br>$\alpha$ -Si O2, quartz, syn                |  |  |
| <div>Lattice:<br/>S.G.:</div>                                                                                                                                                                                                                                                                                                                                                                                                               |  | Hexagonal<br>P321 (154)                                     | <div>Mol. weight =<br/>Volume [CD] =<br/>Dx =<br/>Dm =<br/>l/lcor =</div> |  |  |
| <div>a =<br/>b =<br/>c =<br/>a/b =<br/>c/b =</div>                                                                                                                                                                                                                                                                                                                                                                                          |  | <div>5.15390<br/><br/>5.79810<br/>1.00000<br/>1.12499</div> | <div>alpha =<br/>beta =<br/>gamma =<br/>Z = 3</div>                       |  |  |
| <div>ANX: AX2<br/>Analysis: O2 Si1<br/>Formula from original source: Si O2<br/>ICSD Collection Code: 70006<br/>Hypothetical Structure: Structure calculated theoretically<br/>Calculated Pattern Original Remarks: Stable up to 846 K, above P6222, above 1143 K tridymite is stable<br/>Minor Warning: No e.s.d reported/abstracted on the cell dimension<br/>Wyckoff Sequence: c a(P3221)<br/>Unit Cell Data Source: Single Crystal</div> |  |                                                             |                                                                           |  |  |
| <div>Structure<br/>Publication: Phys. Rev. B: Condens. Matter. Mater. Phys.<br/>Detail: volume 44, page 489 (1991)<br/>Authors: Chelikowsky, J.R., Troullier, N., Martins, J.L., King, Jr., H.E.<br/>Primary Reference<br/>Publication: Calculated from ICSD using POWD-12++</div>                                                                                                                                                          |  |                                                             |                                                                           |  |  |
| <div>Radiation:<br/>Wavelength:<br/>h:</div>                                                                                                                                                                                                                                                                                                                                                                                                |  | CuK $\alpha$ 1<br>1.54060                                   | <div>Filter:<br/>d-spacing:</div>                                         |  |  |
| <div>SS/FOM:</div>                                                                                                                                                                                                                                                                                                                                                                                                                          |  | 999.9 (0,31)                                                |                                                                           |  |  |

| d           | 2θ          | l<br>fix | h | k | l |
|-------------|-------------|----------|---|---|---|
| 0.8842<br>1 | 121.19<br>2 | 2        | 0 | 4 | 4 |
| 0.8822<br>9 | 121.63<br>5 | 3        | 0 | 5 | 1 |
| 0.8697<br>9 | 124.65<br>5 | 4        | 1 | 4 | 3 |
| 0.8619<br>4 | 126.67<br>9 | 3        | 2 | 2 | 5 |
| 0.8589<br>8 | 127.47<br>0 | 2        | 3 | 3 | 0 |
| 0.8531<br>5 | 129.08<br>1 | 5        | 0 | 5 | 2 |
| 0.8497<br>1 | 130.06<br>4 | 4        | 3 | 3 | 1 |
| 0.8463<br>1 | 131.06<br>4 | 7        | 3 | 1 | 5 |
| 0.8435<br>0 | 131.90<br>7 | 5        | 4 | 2 | 0 |
| 0.8385<br>2 | 133.45<br>5 | 2        | 1 | 2 | 6 |
| 0.8363<br>4 | 134.15<br>5 | 9        | 2 | 3 | 4 |
| 0.8347<br>2 | 134.68<br>6 | 2        | 2 | 4 | 1 |
| 0.8235<br>9 | 138.55<br>1 | 2        | 3 | 3 | 2 |
| 0.8144<br>0 | 142.11<br>9 | 4        | 0 | 1 | 7 |
| 0.8104<br>1 | 143.79<br>7 | 5        | 0 | 3 | 6 |
| 0.8104<br>1 | 143.79<br>6 | 5        | 5 | 0 | 3 |
| 0.8099<br>2 | 144.01<br>0 | 4        | 2 | 4 | 2 |
| 0.8084<br>4 | 144.66<br>1 | 5        | 1 | 4 | 4 |
| 0.8040<br>5 | 146.67<br>9 | 2        | 0 | 4 | 5 |
| 0.8016<br>5 | 147.84<br>6 | 3        | 5 | 1 | 0 |
