# Supplementary material
Source: MDPI journal article supplement (https://www.mdpi.com/2076-3417/7/5/514)
Supplement: s1 [file s1]

## Raw Rice Husk (Coupled TwoTheta/Theta)

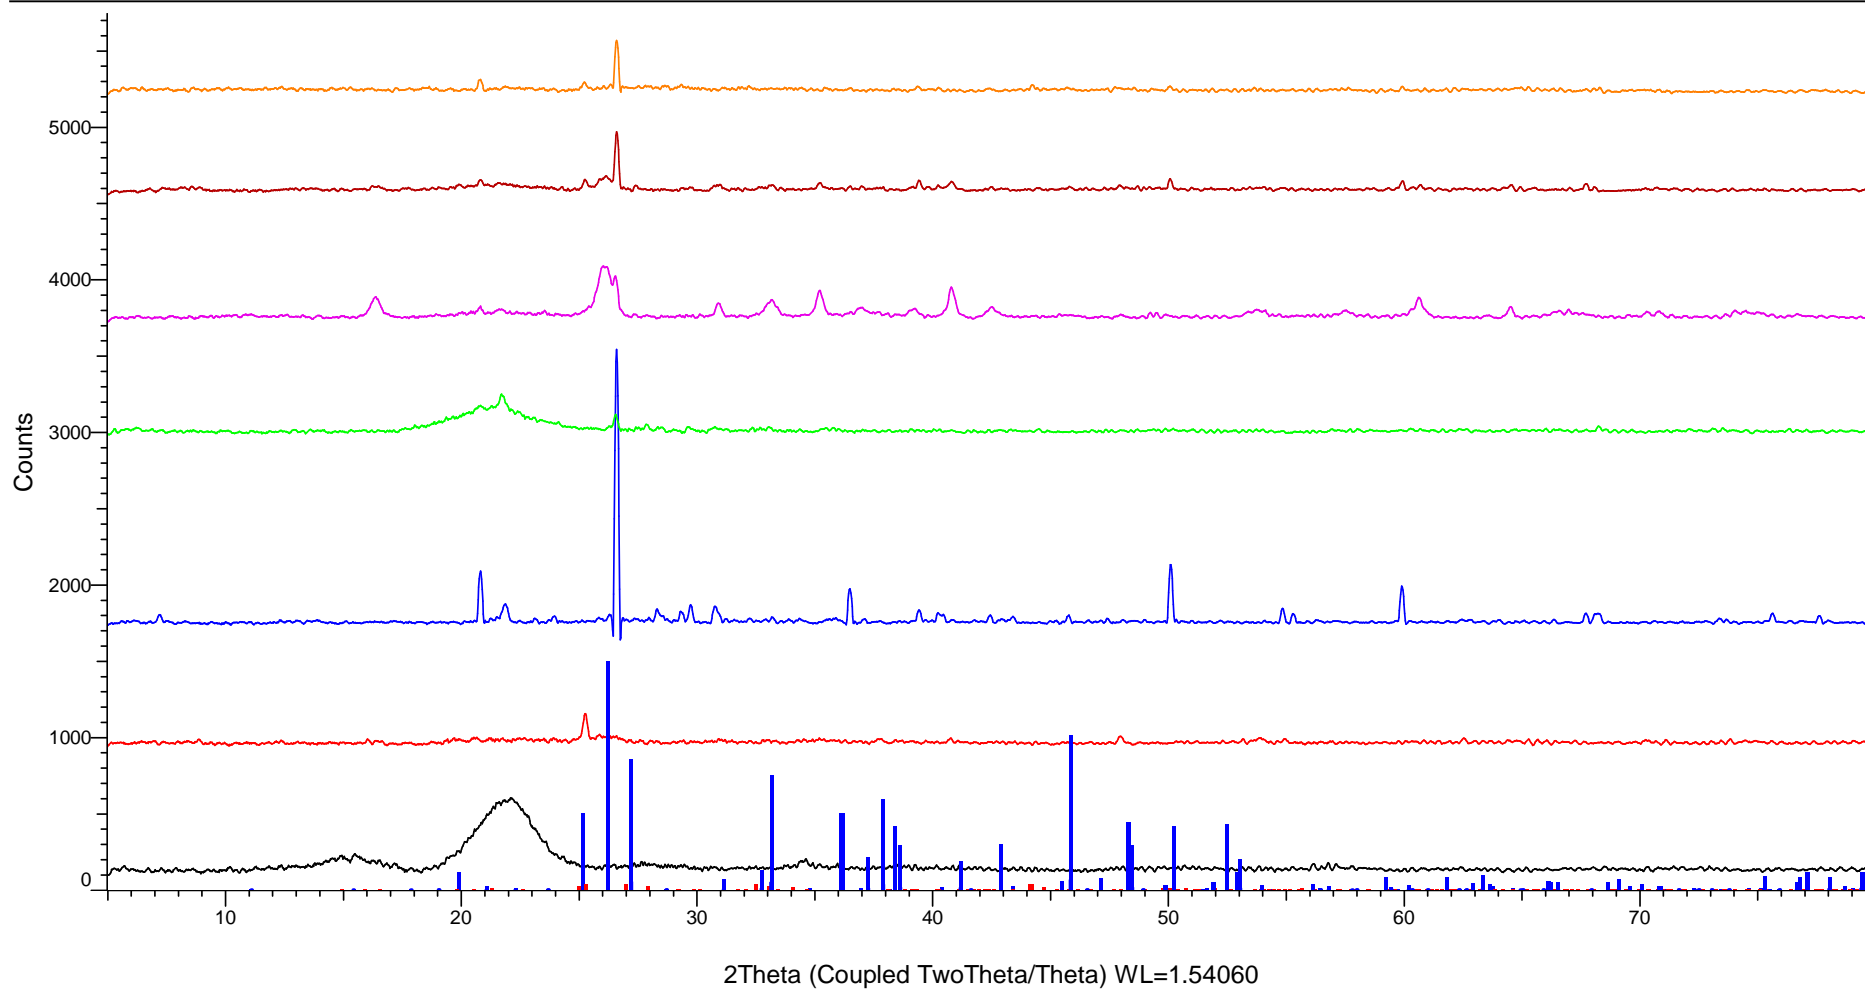

Pattern: PDF 01-080-2147 (Tune Cell)    Radiation: 1.54060    Quality:  
User modified

| <b>Formula</b> Si O2                                                                                   |        |                                                                             | <table><tr><th>d</th><th>2θ</th><th>I<br/>fix</th><th>h</th><th>k</th><th>l</th><th>d</th><th>2θ</th><th>I<br/>fix</th><th>h</th><th>k</th><th>l</th></tr><tr><td>4.4634<sub>1</sub></td><td>19.876</td><td>233</td><td>1</td><td>0</td><td>0</td><td>1.1384<sub>8</sub></td><td>85.158</td><td>13</td><td>1</td><td>3</td><td>2</td></tr><tr><td>3.5368<sub>2</sub></td><td>25.159</td><td>999</td><td>0</td><td>1</td><td>1</td><td>1.1223<sub>6</sub></td><td>86.679</td><td>13</td><td>0</td><td>1</td><td>5</td></tr><tr><td>2.5769<sub>5</sub></td><td>34.785</td><td>28</td><td>1</td><td>1</td><td>0</td><td>1.1158<sub>5</sub></td><td>87.312</td><td>9</td><td>4</td><td>0</td><td>0</td></tr><tr><td>2.4312<sub>3</sub></td><td>36.943</td><td>25</td><td>1</td><td>0</td><td>2</td><td>1.0994<sub>3</sub></td><td>88.956</td><td>13</td><td>2</td><td>1</td><td>4</td></tr><tr><td>2.3548<sub>4</sub></td><td>38.187</td><td>11</td><td>1</td><td>1</td><td>1</td><td>1.0957<sub>4</sub></td><td>89.335</td><td>4</td><td>0</td><td>4</td><td></td></tr><tr><td>2.2317<sub>0</sub></td><td>40.383</td><td>36</td><td>2</td><td>0</td><td>0</td><td>1.0720<sub>7</sub></td><td>91.864</td><td>10</td><td>2</td><td>2</td><td>3</td></tr><tr><td>2.0827<sub>5</sub></td><td>43.412</td><td>49</td><td>0</td><td>2</td><td>1</td><td>1.0574<sub>8</sub></td><td>93.509</td><td>3</td><td>1</td><td>1</td><td>5</td></tr><tr><td>1.9260<sub>3</sub></td><td>47.149</td><td>151</td><td>1</td><td>1</td><td>2</td><td>1.0424<sub>3</sub></td><td>95.284</td><td>2</td><td>1</td><td>3</td><td>3</td></tr><tr><td>1.7735<sub>7</sub></td><td>51.484</td><td>7</td><td>0</td><td>1</td><td>3</td><td>1.0413<sub>8</sub></td><td>95.411</td><td>2</td><td>0</td><td>4</td><td>2</td></tr><tr><td>1.7684<sub>1</sub></td><td>51.646</td><td>30</td><td>0</td><td>2</td><td>2</td><td>1.0382<sub>4</sub></td><td>95.792</td><td>4</td><td>0</td><td>3</td><td>4</td></tr><tr><td>1.6870<sub>1</sub></td><td>54.337</td><td>4</td><td>2</td><td>1</td><td>0</td><td>1.0290<sub>0</sub></td><td>96.937</td><td>2</td><td>0</td><td>2</td><td>5</td></tr><tr><td>1.6198<sub>4</sub></td><td>56.789</td><td>51</td><td>1</td><td>2</td><td>1</td><td>1.0239<sub>8</sub></td><td>97.574</td><td>4</td><td>3</td><td>2</td><td>0</td></tr><tr><td>1.5461<sub>6</sub></td><td>59.762</td><td>9</td><td>1</td><td>1</td><td>3</td><td>1.0083<sub>7</sub></td><td>99.619</td><td>7</td><td>2</td><td>3</td><td>1</td></tr><tr><td>1.4878<sub>0</sub></td><td>62.362</td><td>11</td><td>3</td><td>0</td><td>0</td><td>0.9740<sub>0</sub></td><td>104.53<sub>3</sub></td><td>2</td><td>4</td><td>1</td><td>0</td></tr><tr><td>1.4609<sub>9</sub></td><td>63.639</td><td>68</td><td>0</td><td>2</td><td>3</td><td>0.9663<sub>5</sub></td><td>105.71<sub>3</sub></td><td>9</td><td>0</td><td>0</td><td>6</td></tr><tr><td>1.4581<sub>0</sub></td><td>63.780</td><td>49</td><td>1</td><td>2</td><td>2</td><td>0.9663<sub>5</sub></td><td>105.71<sub>2</sub></td><td>9</td><td>0</td><td>4</td><td>3</td></tr><tr><td>1.4411<sub>1</sub></td><td>64.622</td><td>20</td><td>0</td><td>3</td><td>1</td><td>0.9655<sub>2</sub></td><td>105.84<sub>3</sub></td><td>9</td><td>3</td><td>2</td><td>2</td></tr><tr><td>1.3786<sub>5</sub></td><td>67.937</td><td>7</td><td>1</td><td>0</td><td>4</td><td>0.9630<sub>2</sub></td><td>106.23<sub>8</sub></td><td>2</td><td>2</td><td>2</td><td>4</td></tr><tr><td>1.3236<sub>7</sub></td><td>71.175</td><td>14</td><td>0</td><td>3</td><td>2</td><td>0.9605<sub>4</sub></td><td>106.63<sub>3</sub></td><td>10</td><td>1</td><td>4</td><td>1</td></tr><tr><td>1.2884<sub>8</sub></td><td>73.430</td><td>13</td><td>2</td><td>2</td><td>0</td><td>0.9556<sub>3</sub></td><td>107.42<sub>7</sub></td><td>7</td><td>1</td><td>2</td><td>5</td></tr><tr><td>1.2709<sub>4</sub></td><td>74.614</td><td>26</td><td>1</td><td>2</td><td>3</td><td>0.9444<sub>7</sub></td><td>109.29<sub>2</sub></td><td>3</td><td>1</td><td>0</td><td>6</td></tr><tr><td>1.2633<sub>7</sub></td><td>75.138</td><td>25</td><td>1</td><td>1</td><td>4</td><td>0.9413<sub>5</sub></td><td>109.82<sub>8</sub></td><td>5</td><td>3</td><td>1</td><td>4</td></tr><tr><td>1.2577<sub>9</sub></td><td>75.530</td><td>5</td><td>2</td><td>2</td><td>1</td><td>0.9232<sub>8</sub></td><td>113.08<sub>8</sub></td><td>5</td><td>1</td><td>4</td><td>2</td></tr><tr><td>1.2379<sub>3</sub></td><td>76.961</td><td>13</td><td>3</td><td>1</td><td>0</td><td>0.9146<sub>2</sub></td><td>114.74<sub>8</sub></td><td>3</td><td>0</td><td>3</td><td>5</td></tr><tr><td>1.2156<sub>1</sub></td><td>78.643</td><td>5</td><td>2</td><td>0</td><td>4</td><td>0.9048<sub>2</sub></td><td>116.71<sub>3</sub></td><td>2</td><td>1</td><td>1</td><td>6</td></tr><tr><td>1.2106<sub>4</sub></td><td>79.029</td><td>28</td><td>1</td><td>3</td><td>1</td><td>0.9048<sub>3</sub></td><td>116.71<sub>2</sub></td><td>2</td><td>2</td><td>3</td><td>3</td></tr><tr><td>1.1789<sub>4</sub></td><td>81.594</td><td>2</td><td>0</td><td>3</td><td>3</td><td>0.8926<sub>8</sub></td><td>119.28<sub>9</sub></td><td>2</td><td>5</td><td>0</td><td>0</td></tr><tr><td>1.1774<sub>2</sub></td><td>81.722</td><td>3</td><td>2</td><td>2</td><td>2</td><td>0.8867<sub>8</sub></td><td>120.60<sub>3</sub></td><td>5</td><td>0</td><td>2</td><td>6</td></tr></table> |   |   |                     |                     |          |   |   |   |  |  |  | d | 2θ | I<br>fix | h | k | l | d | 2θ | I<br>fix | h | k | l | 4.4634 <sub>1</sub> | 19.876 | 233 | 1 | 0 | 0 | 1.1384 <sub>8</sub> | 85.158 | 13 | 1 | 3 | 2 | 3.5368 <sub>2</sub> | 25.159 | 999 | 0 | 1 | 1 | 1.1223 <sub>6</sub> | 86.679 | 13 | 0 | 1 | 5 | 2.5769 <sub>5</sub> | 34.785 | 28 | 1 | 1 | 0 | 1.1158 <sub>5</sub> | 87.312 | 9 | 4 | 0 | 0 | 2.4312 <sub>3</sub> | 36.943 | 25 | 1 | 0 | 2 | 1.0994 <sub>3</sub> | 88.956 | 13 | 2 | 1 | 4 | 2.3548 <sub>4</sub> | 38.187 | 11 | 1 | 1 | 1 | 1.0957 <sub>4</sub> | 89.335 | 4 | 0 | 4 |  | 2.2317 <sub>0</sub> | 40.383 | 36 | 2 | 0 | 0 | 1.0720 <sub>7</sub> | 91.864 | 10 | 2 | 2 | 3 | 2.0827 <sub>5</sub> | 43.412 | 49 | 0 | 2 | 1 | 1.0574 <sub>8</sub> | 93.509 | 3 | 1 | 1 | 5 | 1.9260 <sub>3</sub> | 47.149 | 151 | 1 | 1 | 2 | 1.0424 <sub>3</sub> | 95.284 | 2 | 1 | 3 | 3 | 1.7735 <sub>7</sub> | 51.484 | 7 | 0 | 1 | 3 | 1.0413 <sub>8</sub> | 95.411 | 2 | 0 | 4 | 2 | 1.7684 <sub>1</sub> | 51.646 | 30 | 0 | 2 | 2 | 1.0382 <sub>4</sub> | 95.792 | 4 | 0 | 3 | 4 | 1.6870 <sub>1</sub> | 54.337 | 4 | 2 | 1 | 0 | 1.0290 <sub>0</sub> | 96.937 | 2 | 0 | 2 | 5 | 1.6198 <sub>4</sub> | 56.789 | 51 | 1 | 2 | 1 | 1.0239 <sub>8</sub> | 97.574 | 4 | 3 | 2 | 0 | 1.5461 <sub>6</sub> | 59.762 | 9 | 1 | 1 | 3 | 1.0083 <sub>7</sub> | 99.619 | 7 | 2 | 3 | 1 | 1.4878 <sub>0</sub> | 62.362 | 11 | 3 | 0 | 0 | 0.9740 <sub>0</sub> | 104.53 <sub>3</sub> | 2 | 4 | 1 | 0 | 1.4609 <sub>9</sub> | 63.639 | 68 | 0 | 2 | 3 | 0.9663 <sub>5</sub> | 105.71 <sub>3</sub> | 9 | 0 | 0 | 6 | 1.4581 <sub>0</sub> | 63.780 | 49 | 1 | 2 | 2 | 0.9663 <sub>5</sub> | 105.71 <sub>2</sub> | 9 | 0 | 4 | 3 | 1.4411 <sub>1</sub> | 64.622 | 20 | 0 | 3 | 1 | 0.9655 <sub>2</sub> | 105.84 <sub>3</sub> | 9 | 3 | 2 | 2 | 1.3786 <sub>5</sub> | 67.937 | 7 | 1 | 0 | 4 | 0.9630 <sub>2</sub> | 106.23 <sub>8</sub> | 2 | 2 | 2 | 4 | 1.3236 <sub>7</sub> | 71.175 | 14 | 0 | 3 | 2 | 0.9605 <sub>4</sub> | 106.63 <sub>3</sub> | 10 | 1 | 4 | 1 | 1.2884 <sub>8</sub> | 73.430 | 13 | 2 | 2 | 0 | 0.9556 <sub>3</sub> | 107.42 <sub>7</sub> | 7 | 1 | 2 | 5 | 1.2709 <sub>4</sub> | 74.614 | 26 | 1 | 2 | 3 | 0.9444 <sub>7</sub> | 109.29 <sub>2</sub> | 3 | 1 | 0 | 6 | 1.2633 <sub>7</sub> | 75.138 | 25 | 1 | 1 | 4 | 0.9413 <sub>5</sub> | 109.82 <sub>8</sub> | 5 | 3 | 1 | 4 | 1.2577 <sub>9</sub> | 75.530 | 5 | 2 | 2 | 1 | 0.9232 <sub>8</sub> | 113.08 <sub>8</sub> | 5 | 1 | 4 | 2 | 1.2379 <sub>3</sub> | 76.961 | 13 | 3 | 1 | 0 | 0.9146 <sub>2</sub> | 114.74 <sub>8</sub> | 3 | 0 | 3 | 5 | 1.2156 <sub>1</sub> | 78.643 | 5 | 2 | 0 | 4 | 0.9048 <sub>2</sub> | 116.71 <sub>3</sub> | 2 | 1 | 1 | 6 | 1.2106 <sub>4</sub> | 79.029 | 28 | 1 | 3 | 1 | 0.9048 <sub>3</sub> | 116.71 <sub>2</sub> | 2 | 2 | 3 | 3 | 1.1789 <sub>4</sub> | 81.594 | 2 | 0 | 3 | 3 | 0.8926 <sub>8</sub> | 119.28 <sub>9</sub> | 2 | 5 | 0 | 0 | 1.1774 <sub>2</sub> | 81.722 | 3 | 2 | 2 | 2 | 0.8867 <sub>8</sub> | 120.60 <sub>3</sub> | 5 | 0 | 2 | 6 |
|--------------------------------------------------------------------------------------------------------|--------|-----------------------------------------------------------------------------|-------------------------------------------------------------------------------------------------------------------------------------------------------------------------------------------------------------------------------------------------------------------------------------------------------------------------------------------------------------------------------------------------------------------------------------------------------------------------------------------------------------------------------------------------------------------------------------------------------------------------------------------------------------------------------------------------------------------------------------------------------------------------------------------------------------------------------------------------------------------------------------------------------------------------------------------------------------------------------------------------------------------------------------------------------------------------------------------------------------------------------------------------------------------------------------------------------------------------------------------------------------------------------------------------------------------------------------------------------------------------------------------------------------------------------------------------------------------------------------------------------------------------------------------------------------------------------------------------------------------------------------------------------------------------------------------------------------------------------------------------------------------------------------------------------------------------------------------------------------------------------------------------------------------------------------------------------------------------------------------------------------------------------------------------------------------------------------------------------------------------------------------------------------------------------------------------------------------------------------------------------------------------------------------------------------------------------------------------------------------------------------------------------------------------------------------------------------------------------------------------------------------------------------------------------------------------------------------------------------------------------------------------------------------------------------------------------------------------------------------------------------------------------------------------------------------------------------------------------------------------------------------------------------------------------------------------------------------------------------------------------------------------------------------------------------------------------------------------------------------------------------------------------------------------------------------------------------------------------------------------------------------------------------------------------------------------------------------------------------------------------------------------------------------------------------------------------------------------------------------------------------------------------------------------------------------------------------------------------------------------------------------------------------------------------------------------------------------------------------------------------------------------------------------------------------------------------------------------------------------------------------------------------------------------------------------------------------------------------------------------------------------------------------------------------------------------------------------------------------------------------------------------------------------------------------------------------------------------------------------------------------------------------------------------------------------------------------------------------------------------------------------------------------------------------------------------------------------------------------------------------------------------------------------------------------------------------------------------------------------------------------------------------------------------------------------------------------------------------------------------------------------------------------------------------------------------------------------------------------------------------------------------------------------------------------------------------------------------------------------------------------------------------------------------------------------------------------------------------------------------------------------------------------------------------------------------------------------------------------------------------------------------------------------------------------------------------------------------------------------------------------------------------------------------------|---|---|---------------------|---------------------|----------|---|---|---|--|--|--|---|----|----------|---|---|---|---|----|----------|---|---|---|---------------------|--------|-----|---|---|---|---------------------|--------|----|---|---|---|---------------------|--------|-----|---|---|---|---------------------|--------|----|---|---|---|---------------------|--------|----|---|---|---|---------------------|--------|---|---|---|---|---------------------|--------|----|---|---|---|---------------------|--------|----|---|---|---|---------------------|--------|----|---|---|---|---------------------|--------|---|---|---|--|---------------------|--------|----|---|---|---|---------------------|--------|----|---|---|---|---------------------|--------|----|---|---|---|---------------------|--------|---|---|---|---|---------------------|--------|-----|---|---|---|---------------------|--------|---|---|---|---|---------------------|--------|---|---|---|---|---------------------|--------|---|---|---|---|---------------------|--------|----|---|---|---|---------------------|--------|---|---|---|---|---------------------|--------|---|---|---|---|---------------------|--------|---|---|---|---|---------------------|--------|----|---|---|---|---------------------|--------|---|---|---|---|---------------------|--------|---|---|---|---|---------------------|--------|---|---|---|---|---------------------|--------|----|---|---|---|---------------------|---------------------|---|---|---|---|---------------------|--------|----|---|---|---|---------------------|---------------------|---|---|---|---|---------------------|--------|----|---|---|---|---------------------|---------------------|---|---|---|---|---------------------|--------|----|---|---|---|---------------------|---------------------|---|---|---|---|---------------------|--------|---|---|---|---|---------------------|---------------------|---|---|---|---|---------------------|--------|----|---|---|---|---------------------|---------------------|----|---|---|---|---------------------|--------|----|---|---|---|---------------------|---------------------|---|---|---|---|---------------------|--------|----|---|---|---|---------------------|---------------------|---|---|---|---|---------------------|--------|----|---|---|---|---------------------|---------------------|---|---|---|---|---------------------|--------|---|---|---|---|---------------------|---------------------|---|---|---|---|---------------------|--------|----|---|---|---|---------------------|---------------------|---|---|---|---|---------------------|--------|---|---|---|---|---------------------|---------------------|---|---|---|---|---------------------|--------|----|---|---|---|---------------------|---------------------|---|---|---|---|---------------------|--------|---|---|---|---|---------------------|---------------------|---|---|---|---|---------------------|--------|---|---|---|---|---------------------|---------------------|---|---|---|---|
| d                                                                                                      | 2θ     | I<br>fix                                                                    | h                                                                                                                                                                                                                                                                                                                                                                                                                                                                                                                                                                                                                                                                                                                                                                                                                                                                                                                                                                                                                                                                                                                                                                                                                                                                                                                                                                                                                                                                                                                                                                                                                                                                                                                                                                                                                                                                                                                                                                                                                                                                                                                                                                                                                                                                                                                                                                                                                                                                                                                                                                                                                                                                                                                                                                                                                                                                                                                                                                                                                                                                                                                                                                                                                                                                                                                                                                                                                                                                                                                                                                                                                                                                                                                                                                                                                                                                                                                                                                                                                                                                                                                                                                                                                                                                                                                                                                                                                                                                                                                                                                                                                                                                                                                                                                                                                                                                                                                                                                                                                                                                                                                                                                                                                                                                                                                                                                                                                             | k | l | d                   | 2θ                  | I<br>fix | h | k | l |  |  |  |   |    |          |   |   |   |   |    |          |   |   |   |                     |        |     |   |   |   |                     |        |    |   |   |   |                     |        |     |   |   |   |                     |        |    |   |   |   |                     |        |    |   |   |   |                     |        |   |   |   |   |                     |        |    |   |   |   |                     |        |    |   |   |   |                     |        |    |   |   |   |                     |        |   |   |   |  |                     |        |    |   |   |   |                     |        |    |   |   |   |                     |        |    |   |   |   |                     |        |   |   |   |   |                     |        |     |   |   |   |                     |        |   |   |   |   |                     |        |   |   |   |   |                     |        |   |   |   |   |                     |        |    |   |   |   |                     |        |   |   |   |   |                     |        |   |   |   |   |                     |        |   |   |   |   |                     |        |    |   |   |   |                     |        |   |   |   |   |                     |        |   |   |   |   |                     |        |   |   |   |   |                     |        |    |   |   |   |                     |                     |   |   |   |   |                     |        |    |   |   |   |                     |                     |   |   |   |   |                     |        |    |   |   |   |                     |                     |   |   |   |   |                     |        |    |   |   |   |                     |                     |   |   |   |   |                     |        |   |   |   |   |                     |                     |   |   |   |   |                     |        |    |   |   |   |                     |                     |    |   |   |   |                     |        |    |   |   |   |                     |                     |   |   |   |   |                     |        |    |   |   |   |                     |                     |   |   |   |   |                     |        |    |   |   |   |                     |                     |   |   |   |   |                     |        |   |   |   |   |                     |                     |   |   |   |   |                     |        |    |   |   |   |                     |                     |   |   |   |   |                     |        |   |   |   |   |                     |                     |   |   |   |   |                     |        |    |   |   |   |                     |                     |   |   |   |   |                     |        |   |   |   |   |                     |                     |   |   |   |   |                     |        |   |   |   |   |                     |                     |   |   |   |   |
| 4.4634 <sub>1</sub>                                                                                    | 19.876 | 233                                                                         | 1                                                                                                                                                                                                                                                                                                                                                                                                                                                                                                                                                                                                                                                                                                                                                                                                                                                                                                                                                                                                                                                                                                                                                                                                                                                                                                                                                                                                                                                                                                                                                                                                                                                                                                                                                                                                                                                                                                                                                                                                                                                                                                                                                                                                                                                                                                                                                                                                                                                                                                                                                                                                                                                                                                                                                                                                                                                                                                                                                                                                                                                                                                                                                                                                                                                                                                                                                                                                                                                                                                                                                                                                                                                                                                                                                                                                                                                                                                                                                                                                                                                                                                                                                                                                                                                                                                                                                                                                                                                                                                                                                                                                                                                                                                                                                                                                                                                                                                                                                                                                                                                                                                                                                                                                                                                                                                                                                                                                                             | 0 | 0 | 1.1384 <sub>8</sub> | 85.158              | 13       | 1 | 3 | 2 |  |  |  |   |    |          |   |   |   |   |    |          |   |   |   |                     |        |     |   |   |   |                     |        |    |   |   |   |                     |        |     |   |   |   |                     |        |    |   |   |   |                     |        |    |   |   |   |                     |        |   |   |   |   |                     |        |    |   |   |   |                     |        |    |   |   |   |                     |        |    |   |   |   |                     |        |   |   |   |  |                     |        |    |   |   |   |                     |        |    |   |   |   |                     |        |    |   |   |   |                     |        |   |   |   |   |                     |        |     |   |   |   |                     |        |   |   |   |   |                     |        |   |   |   |   |                     |        |   |   |   |   |                     |        |    |   |   |   |                     |        |   |   |   |   |                     |        |   |   |   |   |                     |        |   |   |   |   |                     |        |    |   |   |   |                     |        |   |   |   |   |                     |        |   |   |   |   |                     |        |   |   |   |   |                     |        |    |   |   |   |                     |                     |   |   |   |   |                     |        |    |   |   |   |                     |                     |   |   |   |   |                     |        |    |   |   |   |                     |                     |   |   |   |   |                     |        |    |   |   |   |                     |                     |   |   |   |   |                     |        |   |   |   |   |                     |                     |   |   |   |   |                     |        |    |   |   |   |                     |                     |    |   |   |   |                     |        |    |   |   |   |                     |                     |   |   |   |   |                     |        |    |   |   |   |                     |                     |   |   |   |   |                     |        |    |   |   |   |                     |                     |   |   |   |   |                     |        |   |   |   |   |                     |                     |   |   |   |   |                     |        |    |   |   |   |                     |                     |   |   |   |   |                     |        |   |   |   |   |                     |                     |   |   |   |   |                     |        |    |   |   |   |                     |                     |   |   |   |   |                     |        |   |   |   |   |                     |                     |   |   |   |   |                     |        |   |   |   |   |                     |                     |   |   |   |   |
| 3.5368 <sub>2</sub>                                                                                    | 25.159 | 999                                                                         | 0                                                                                                                                                                                                                                                                                                                                                                                                                                                                                                                                                                                                                                                                                                                                                                                                                                                                                                                                                                                                                                                                                                                                                                                                                                                                                                                                                                                                                                                                                                                                                                                                                                                                                                                                                                                                                                                                                                                                                                                                                                                                                                                                                                                                                                                                                                                                                                                                                                                                                                                                                                                                                                                                                                                                                                                                                                                                                                                                                                                                                                                                                                                                                                                                                                                                                                                                                                                                                                                                                                                                                                                                                                                                                                                                                                                                                                                                                                                                                                                                                                                                                                                                                                                                                                                                                                                                                                                                                                                                                                                                                                                                                                                                                                                                                                                                                                                                                                                                                                                                                                                                                                                                                                                                                                                                                                                                                                                                                             | 1 | 1 | 1.1223 <sub>6</sub> | 86.679              | 13       | 0 | 1 | 5 |  |  |  |   |    |          |   |   |   |   |    |          |   |   |   |                     |        |     |   |   |   |                     |        |    |   |   |   |                     |        |     |   |   |   |                     |        |    |   |   |   |                     |        |    |   |   |   |                     |        |   |   |   |   |                     |        |    |   |   |   |                     |        |    |   |   |   |                     |        |    |   |   |   |                     |        |   |   |   |  |                     |        |    |   |   |   |                     |        |    |   |   |   |                     |        |    |   |   |   |                     |        |   |   |   |   |                     |        |     |   |   |   |                     |        |   |   |   |   |                     |        |   |   |   |   |                     |        |   |   |   |   |                     |        |    |   |   |   |                     |        |   |   |   |   |                     |        |   |   |   |   |                     |        |   |   |   |   |                     |        |    |   |   |   |                     |        |   |   |   |   |                     |        |   |   |   |   |                     |        |   |   |   |   |                     |        |    |   |   |   |                     |                     |   |   |   |   |                     |        |    |   |   |   |                     |                     |   |   |   |   |                     |        |    |   |   |   |                     |                     |   |   |   |   |                     |        |    |   |   |   |                     |                     |   |   |   |   |                     |        |   |   |   |   |                     |                     |   |   |   |   |                     |        |    |   |   |   |                     |                     |    |   |   |   |                     |        |    |   |   |   |                     |                     |   |   |   |   |                     |        |    |   |   |   |                     |                     |   |   |   |   |                     |        |    |   |   |   |                     |                     |   |   |   |   |                     |        |   |   |   |   |                     |                     |   |   |   |   |                     |        |    |   |   |   |                     |                     |   |   |   |   |                     |        |   |   |   |   |                     |                     |   |   |   |   |                     |        |    |   |   |   |                     |                     |   |   |   |   |                     |        |   |   |   |   |                     |                     |   |   |   |   |                     |        |   |   |   |   |                     |                     |   |   |   |   |
| 2.5769 <sub>5</sub>                                                                                    | 34.785 | 28                                                                          | 1                                                                                                                                                                                                                                                                                                                                                                                                                                                                                                                                                                                                                                                                                                                                                                                                                                                                                                                                                                                                                                                                                                                                                                                                                                                                                                                                                                                                                                                                                                                                                                                                                                                                                                                                                                                                                                                                                                                                                                                                                                                                                                                                                                                                                                                                                                                                                                                                                                                                                                                                                                                                                                                                                                                                                                                                                                                                                                                                                                                                                                                                                                                                                                                                                                                                                                                                                                                                                                                                                                                                                                                                                                                                                                                                                                                                                                                                                                                                                                                                                                                                                                                                                                                                                                                                                                                                                                                                                                                                                                                                                                                                                                                                                                                                                                                                                                                                                                                                                                                                                                                                                                                                                                                                                                                                                                                                                                                                                             | 1 | 0 | 1.1158 <sub>5</sub> | 87.312              | 9        | 4 | 0 | 0 |  |  |  |   |    |          |   |   |   |   |    |          |   |   |   |                     |        |     |   |   |   |                     |        |    |   |   |   |                     |        |     |   |   |   |                     |        |    |   |   |   |                     |        |    |   |   |   |                     |        |   |   |   |   |                     |        |    |   |   |   |                     |        |    |   |   |   |                     |        |    |   |   |   |                     |        |   |   |   |  |                     |        |    |   |   |   |                     |        |    |   |   |   |                     |        |    |   |   |   |                     |        |   |   |   |   |                     |        |     |   |   |   |                     |        |   |   |   |   |                     |        |   |   |   |   |                     |        |   |   |   |   |                     |        |    |   |   |   |                     |        |   |   |   |   |                     |        |   |   |   |   |                     |        |   |   |   |   |                     |        |    |   |   |   |                     |        |   |   |   |   |                     |        |   |   |   |   |                     |        |   |   |   |   |                     |        |    |   |   |   |                     |                     |   |   |   |   |                     |        |    |   |   |   |                     |                     |   |   |   |   |                     |        |    |   |   |   |                     |                     |   |   |   |   |                     |        |    |   |   |   |                     |                     |   |   |   |   |                     |        |   |   |   |   |                     |                     |   |   |   |   |                     |        |    |   |   |   |                     |                     |    |   |   |   |                     |        |    |   |   |   |                     |                     |   |   |   |   |                     |        |    |   |   |   |                     |                     |   |   |   |   |                     |        |    |   |   |   |                     |                     |   |   |   |   |                     |        |   |   |   |   |                     |                     |   |   |   |   |                     |        |    |   |   |   |                     |                     |   |   |   |   |                     |        |   |   |   |   |                     |                     |   |   |   |   |                     |        |    |   |   |   |                     |                     |   |   |   |   |                     |        |   |   |   |   |                     |                     |   |   |   |   |                     |        |   |   |   |   |                     |                     |   |   |   |   |
| 2.4312 <sub>3</sub>                                                                                    | 36.943 | 25                                                                          | 1                                                                                                                                                                                                                                                                                                                                                                                                                                                                                                                                                                                                                                                                                                                                                                                                                                                                                                                                                                                                                                                                                                                                                                                                                                                                                                                                                                                                                                                                                                                                                                                                                                                                                                                                                                                                                                                                                                                                                                                                                                                                                                                                                                                                                                                                                                                                                                                                                                                                                                                                                                                                                                                                                                                                                                                                                                                                                                                                                                                                                                                                                                                                                                                                                                                                                                                                                                                                                                                                                                                                                                                                                                                                                                                                                                                                                                                                                                                                                                                                                                                                                                                                                                                                                                                                                                                                                                                                                                                                                                                                                                                                                                                                                                                                                                                                                                                                                                                                                                                                                                                                                                                                                                                                                                                                                                                                                                                                                             | 0 | 2 | 1.0994 <sub>3</sub> | 88.956              | 13       | 2 | 1 | 4 |  |  |  |   |    |          |   |   |   |   |    |          |   |   |   |                     |        |     |   |   |   |                     |        |    |   |   |   |                     |        |     |   |   |   |                     |        |    |   |   |   |                     |        |    |   |   |   |                     |        |   |   |   |   |                     |        |    |   |   |   |                     |        |    |   |   |   |                     |        |    |   |   |   |                     |        |   |   |   |  |                     |        |    |   |   |   |                     |        |    |   |   |   |                     |        |    |   |   |   |                     |        |   |   |   |   |                     |        |     |   |   |   |                     |        |   |   |   |   |                     |        |   |   |   |   |                     |        |   |   |   |   |                     |        |    |   |   |   |                     |        |   |   |   |   |                     |        |   |   |   |   |                     |        |   |   |   |   |                     |        |    |   |   |   |                     |        |   |   |   |   |                     |        |   |   |   |   |                     |        |   |   |   |   |                     |        |    |   |   |   |                     |                     |   |   |   |   |                     |        |    |   |   |   |                     |                     |   |   |   |   |                     |        |    |   |   |   |                     |                     |   |   |   |   |                     |        |    |   |   |   |                     |                     |   |   |   |   |                     |        |   |   |   |   |                     |                     |   |   |   |   |                     |        |    |   |   |   |                     |                     |    |   |   |   |                     |        |    |   |   |   |                     |                     |   |   |   |   |                     |        |    |   |   |   |                     |                     |   |   |   |   |                     |        |    |   |   |   |                     |                     |   |   |   |   |                     |        |   |   |   |   |                     |                     |   |   |   |   |                     |        |    |   |   |   |                     |                     |   |   |   |   |                     |        |   |   |   |   |                     |                     |   |   |   |   |                     |        |    |   |   |   |                     |                     |   |   |   |   |                     |        |   |   |   |   |                     |                     |   |   |   |   |                     |        |   |   |   |   |                     |                     |   |   |   |   |
| 2.3548 <sub>4</sub>                                                                                    | 38.187 | 11                                                                          | 1                                                                                                                                                                                                                                                                                                                                                                                                                                                                                                                                                                                                                                                                                                                                                                                                                                                                                                                                                                                                                                                                                                                                                                                                                                                                                                                                                                                                                                                                                                                                                                                                                                                                                                                                                                                                                                                                                                                                                                                                                                                                                                                                                                                                                                                                                                                                                                                                                                                                                                                                                                                                                                                                                                                                                                                                                                                                                                                                                                                                                                                                                                                                                                                                                                                                                                                                                                                                                                                                                                                                                                                                                                                                                                                                                                                                                                                                                                                                                                                                                                                                                                                                                                                                                                                                                                                                                                                                                                                                                                                                                                                                                                                                                                                                                                                                                                                                                                                                                                                                                                                                                                                                                                                                                                                                                                                                                                                                                             | 1 | 1 | 1.0957 <sub>4</sub> | 89.335              | 4        | 0 | 4 |   |  |  |  |   |    |          |   |   |   |   |    |          |   |   |   |                     |        |     |   |   |   |                     |        |    |   |   |   |                     |        |     |   |   |   |                     |        |    |   |   |   |                     |        |    |   |   |   |                     |        |   |   |   |   |                     |        |    |   |   |   |                     |        |    |   |   |   |                     |        |    |   |   |   |                     |        |   |   |   |  |                     |        |    |   |   |   |                     |        |    |   |   |   |                     |        |    |   |   |   |                     |        |   |   |   |   |                     |        |     |   |   |   |                     |        |   |   |   |   |                     |        |   |   |   |   |                     |        |   |   |   |   |                     |        |    |   |   |   |                     |        |   |   |   |   |                     |        |   |   |   |   |                     |        |   |   |   |   |                     |        |    |   |   |   |                     |        |   |   |   |   |                     |        |   |   |   |   |                     |        |   |   |   |   |                     |        |    |   |   |   |                     |                     |   |   |   |   |                     |        |    |   |   |   |                     |                     |   |   |   |   |                     |        |    |   |   |   |                     |                     |   |   |   |   |                     |        |    |   |   |   |                     |                     |   |   |   |   |                     |        |   |   |   |   |                     |                     |   |   |   |   |                     |        |    |   |   |   |                     |                     |    |   |   |   |                     |        |    |   |   |   |                     |                     |   |   |   |   |                     |        |    |   |   |   |                     |                     |   |   |   |   |                     |        |    |   |   |   |                     |                     |   |   |   |   |                     |        |   |   |   |   |                     |                     |   |   |   |   |                     |        |    |   |   |   |                     |                     |   |   |   |   |                     |        |   |   |   |   |                     |                     |   |   |   |   |                     |        |    |   |   |   |                     |                     |   |   |   |   |                     |        |   |   |   |   |                     |                     |   |   |   |   |                     |        |   |   |   |   |                     |                     |   |   |   |   |
| 2.2317 <sub>0</sub>                                                                                    | 40.383 | 36                                                                          | 2                                                                                                                                                                                                                                                                                                                                                                                                                                                                                                                                                                                                                                                                                                                                                                                                                                                                                                                                                                                                                                                                                                                                                                                                                                                                                                                                                                                                                                                                                                                                                                                                                                                                                                                                                                                                                                                                                                                                                                                                                                                                                                                                                                                                                                                                                                                                                                                                                                                                                                                                                                                                                                                                                                                                                                                                                                                                                                                                                                                                                                                                                                                                                                                                                                                                                                                                                                                                                                                                                                                                                                                                                                                                                                                                                                                                                                                                                                                                                                                                                                                                                                                                                                                                                                                                                                                                                                                                                                                                                                                                                                                                                                                                                                                                                                                                                                                                                                                                                                                                                                                                                                                                                                                                                                                                                                                                                                                                                             | 0 | 0 | 1.0720 <sub>7</sub> | 91.864              | 10       | 2 | 2 | 3 |  |  |  |   |    |          |   |   |   |   |    |          |   |   |   |                     |        |     |   |   |   |                     |        |    |   |   |   |                     |        |     |   |   |   |                     |        |    |   |   |   |                     |        |    |   |   |   |                     |        |   |   |   |   |                     |        |    |   |   |   |                     |        |    |   |   |   |                     |        |    |   |   |   |                     |        |   |   |   |  |                     |        |    |   |   |   |                     |        |    |   |   |   |                     |        |    |   |   |   |                     |        |   |   |   |   |                     |        |     |   |   |   |                     |        |   |   |   |   |                     |        |   |   |   |   |                     |        |   |   |   |   |                     |        |    |   |   |   |                     |        |   |   |   |   |                     |        |   |   |   |   |                     |        |   |   |   |   |                     |        |    |   |   |   |                     |        |   |   |   |   |                     |        |   |   |   |   |                     |        |   |   |   |   |                     |        |    |   |   |   |                     |                     |   |   |   |   |                     |        |    |   |   |   |                     |                     |   |   |   |   |                     |        |    |   |   |   |                     |                     |   |   |   |   |                     |        |    |   |   |   |                     |                     |   |   |   |   |                     |        |   |   |   |   |                     |                     |   |   |   |   |                     |        |    |   |   |   |                     |                     |    |   |   |   |                     |        |    |   |   |   |                     |                     |   |   |   |   |                     |        |    |   |   |   |                     |                     |   |   |   |   |                     |        |    |   |   |   |                     |                     |   |   |   |   |                     |        |   |   |   |   |                     |                     |   |   |   |   |                     |        |    |   |   |   |                     |                     |   |   |   |   |                     |        |   |   |   |   |                     |                     |   |   |   |   |                     |        |    |   |   |   |                     |                     |   |   |   |   |                     |        |   |   |   |   |                     |                     |   |   |   |   |                     |        |   |   |   |   |                     |                     |   |   |   |   |
| 2.0827 <sub>5</sub>                                                                                    | 43.412 | 49                                                                          | 0                                                                                                                                                                                                                                                                                                                                                                                                                                                                                                                                                                                                                                                                                                                                                                                                                                                                                                                                                                                                                                                                                                                                                                                                                                                                                                                                                                                                                                                                                                                                                                                                                                                                                                                                                                                                                                                                                                                                                                                                                                                                                                                                                                                                                                                                                                                                                                                                                                                                                                                                                                                                                                                                                                                                                                                                                                                                                                                                                                                                                                                                                                                                                                                                                                                                                                                                                                                                                                                                                                                                                                                                                                                                                                                                                                                                                                                                                                                                                                                                                                                                                                                                                                                                                                                                                                                                                                                                                                                                                                                                                                                                                                                                                                                                                                                                                                                                                                                                                                                                                                                                                                                                                                                                                                                                                                                                                                                                                             | 2 | 1 | 1.0574 <sub>8</sub> | 93.509              | 3        | 1 | 1 | 5 |  |  |  |   |    |          |   |   |   |   |    |          |   |   |   |                     |        |     |   |   |   |                     |        |    |   |   |   |                     |        |     |   |   |   |                     |        |    |   |   |   |                     |        |    |   |   |   |                     |        |   |   |   |   |                     |        |    |   |   |   |                     |        |    |   |   |   |                     |        |    |   |   |   |                     |        |   |   |   |  |                     |        |    |   |   |   |                     |        |    |   |   |   |                     |        |    |   |   |   |                     |        |   |   |   |   |                     |        |     |   |   |   |                     |        |   |   |   |   |                     |        |   |   |   |   |                     |        |   |   |   |   |                     |        |    |   |   |   |                     |        |   |   |   |   |                     |        |   |   |   |   |                     |        |   |   |   |   |                     |        |    |   |   |   |                     |        |   |   |   |   |                     |        |   |   |   |   |                     |        |   |   |   |   |                     |        |    |   |   |   |                     |                     |   |   |   |   |                     |        |    |   |   |   |                     |                     |   |   |   |   |                     |        |    |   |   |   |                     |                     |   |   |   |   |                     |        |    |   |   |   |                     |                     |   |   |   |   |                     |        |   |   |   |   |                     |                     |   |   |   |   |                     |        |    |   |   |   |                     |                     |    |   |   |   |                     |        |    |   |   |   |                     |                     |   |   |   |   |                     |        |    |   |   |   |                     |                     |   |   |   |   |                     |        |    |   |   |   |                     |                     |   |   |   |   |                     |        |   |   |   |   |                     |                     |   |   |   |   |                     |        |    |   |   |   |                     |                     |   |   |   |   |                     |        |   |   |   |   |                     |                     |   |   |   |   |                     |        |    |   |   |   |                     |                     |   |   |   |   |                     |        |   |   |   |   |                     |                     |   |   |   |   |                     |        |   |   |   |   |                     |                     |   |   |   |   |
| 1.9260 <sub>3</sub>                                                                                    | 47.149 | 151                                                                         | 1                                                                                                                                                                                                                                                                                                                                                                                                                                                                                                                                                                                                                                                                                                                                                                                                                                                                                                                                                                                                                                                                                                                                                                                                                                                                                                                                                                                                                                                                                                                                                                                                                                                                                                                                                                                                                                                                                                                                                                                                                                                                                                                                                                                                                                                                                                                                                                                                                                                                                                                                                                                                                                                                                                                                                                                                                                                                                                                                                                                                                                                                                                                                                                                                                                                                                                                                                                                                                                                                                                                                                                                                                                                                                                                                                                                                                                                                                                                                                                                                                                                                                                                                                                                                                                                                                                                                                                                                                                                                                                                                                                                                                                                                                                                                                                                                                                                                                                                                                                                                                                                                                                                                                                                                                                                                                                                                                                                                                             | 1 | 2 | 1.0424 <sub>3</sub> | 95.284              | 2        | 1 | 3 | 3 |  |  |  |   |    |          |   |   |   |   |    |          |   |   |   |                     |        |     |   |   |   |                     |        |    |   |   |   |                     |        |     |   |   |   |                     |        |    |   |   |   |                     |        |    |   |   |   |                     |        |   |   |   |   |                     |        |    |   |   |   |                     |        |    |   |   |   |                     |        |    |   |   |   |                     |        |   |   |   |  |                     |        |    |   |   |   |                     |        |    |   |   |   |                     |        |    |   |   |   |                     |        |   |   |   |   |                     |        |     |   |   |   |                     |        |   |   |   |   |                     |        |   |   |   |   |                     |        |   |   |   |   |                     |        |    |   |   |   |                     |        |   |   |   |   |                     |        |   |   |   |   |                     |        |   |   |   |   |                     |        |    |   |   |   |                     |        |   |   |   |   |                     |        |   |   |   |   |                     |        |   |   |   |   |                     |        |    |   |   |   |                     |                     |   |   |   |   |                     |        |    |   |   |   |                     |                     |   |   |   |   |                     |        |    |   |   |   |                     |                     |   |   |   |   |                     |        |    |   |   |   |                     |                     |   |   |   |   |                     |        |   |   |   |   |                     |                     |   |   |   |   |                     |        |    |   |   |   |                     |                     |    |   |   |   |                     |        |    |   |   |   |                     |                     |   |   |   |   |                     |        |    |   |   |   |                     |                     |   |   |   |   |                     |        |    |   |   |   |                     |                     |   |   |   |   |                     |        |   |   |   |   |                     |                     |   |   |   |   |                     |        |    |   |   |   |                     |                     |   |   |   |   |                     |        |   |   |   |   |                     |                     |   |   |   |   |                     |        |    |   |   |   |                     |                     |   |   |   |   |                     |        |   |   |   |   |                     |                     |   |   |   |   |                     |        |   |   |   |   |                     |                     |   |   |   |   |
| 1.7735 <sub>7</sub>                                                                                    | 51.484 | 7                                                                           | 0                                                                                                                                                                                                                                                                                                                                                                                                                                                                                                                                                                                                                                                                                                                                                                                                                                                                                                                                                                                                                                                                                                                                                                                                                                                                                                                                                                                                                                                                                                                                                                                                                                                                                                                                                                                                                                                                                                                                                                                                                                                                                                                                                                                                                                                                                                                                                                                                                                                                                                                                                                                                                                                                                                                                                                                                                                                                                                                                                                                                                                                                                                                                                                                                                                                                                                                                                                                                                                                                                                                                                                                                                                                                                                                                                                                                                                                                                                                                                                                                                                                                                                                                                                                                                                                                                                                                                                                                                                                                                                                                                                                                                                                                                                                                                                                                                                                                                                                                                                                                                                                                                                                                                                                                                                                                                                                                                                                                                             | 1 | 3 | 1.0413 <sub>8</sub> | 95.411              | 2        | 0 | 4 | 2 |  |  |  |   |    |          |   |   |   |   |    |          |   |   |   |                     |        |     |   |   |   |                     |        |    |   |   |   |                     |        |     |   |   |   |                     |        |    |   |   |   |                     |        |    |   |   |   |                     |        |   |   |   |   |                     |        |    |   |   |   |                     |        |    |   |   |   |                     |        |    |   |   |   |                     |        |   |   |   |  |                     |        |    |   |   |   |                     |        |    |   |   |   |                     |        |    |   |   |   |                     |        |   |   |   |   |                     |        |     |   |   |   |                     |        |   |   |   |   |                     |        |   |   |   |   |                     |        |   |   |   |   |                     |        |    |   |   |   |                     |        |   |   |   |   |                     |        |   |   |   |   |                     |        |   |   |   |   |                     |        |    |   |   |   |                     |        |   |   |   |   |                     |        |   |   |   |   |                     |        |   |   |   |   |                     |        |    |   |   |   |                     |                     |   |   |   |   |                     |        |    |   |   |   |                     |                     |   |   |   |   |                     |        |    |   |   |   |                     |                     |   |   |   |   |                     |        |    |   |   |   |                     |                     |   |   |   |   |                     |        |   |   |   |   |                     |                     |   |   |   |   |                     |        |    |   |   |   |                     |                     |    |   |   |   |                     |        |    |   |   |   |                     |                     |   |   |   |   |                     |        |    |   |   |   |                     |                     |   |   |   |   |                     |        |    |   |   |   |                     |                     |   |   |   |   |                     |        |   |   |   |   |                     |                     |   |   |   |   |                     |        |    |   |   |   |                     |                     |   |   |   |   |                     |        |   |   |   |   |                     |                     |   |   |   |   |                     |        |    |   |   |   |                     |                     |   |   |   |   |                     |        |   |   |   |   |                     |                     |   |   |   |   |                     |        |   |   |   |   |                     |                     |   |   |   |   |
| 1.7684 <sub>1</sub>                                                                                    | 51.646 | 30                                                                          | 0                                                                                                                                                                                                                                                                                                                                                                                                                                                                                                                                                                                                                                                                                                                                                                                                                                                                                                                                                                                                                                                                                                                                                                                                                                                                                                                                                                                                                                                                                                                                                                                                                                                                                                                                                                                                                                                                                                                                                                                                                                                                                                                                                                                                                                                                                                                                                                                                                                                                                                                                                                                                                                                                                                                                                                                                                                                                                                                                                                                                                                                                                                                                                                                                                                                                                                                                                                                                                                                                                                                                                                                                                                                                                                                                                                                                                                                                                                                                                                                                                                                                                                                                                                                                                                                                                                                                                                                                                                                                                                                                                                                                                                                                                                                                                                                                                                                                                                                                                                                                                                                                                                                                                                                                                                                                                                                                                                                                                             | 2 | 2 | 1.0382 <sub>4</sub> | 95.792              | 4        | 0 | 3 | 4 |  |  |  |   |    |          |   |   |   |   |    |          |   |   |   |                     |        |     |   |   |   |                     |        |    |   |   |   |                     |        |     |   |   |   |                     |        |    |   |   |   |                     |        |    |   |   |   |                     |        |   |   |   |   |                     |        |    |   |   |   |                     |        |    |   |   |   |                     |        |    |   |   |   |                     |        |   |   |   |  |                     |        |    |   |   |   |                     |        |    |   |   |   |                     |        |    |   |   |   |                     |        |   |   |   |   |                     |        |     |   |   |   |                     |        |   |   |   |   |                     |        |   |   |   |   |                     |        |   |   |   |   |                     |        |    |   |   |   |                     |        |   |   |   |   |                     |        |   |   |   |   |                     |        |   |   |   |   |                     |        |    |   |   |   |                     |        |   |   |   |   |                     |        |   |   |   |   |                     |        |   |   |   |   |                     |        |    |   |   |   |                     |                     |   |   |   |   |                     |        |    |   |   |   |                     |                     |   |   |   |   |                     |        |    |   |   |   |                     |                     |   |   |   |   |                     |        |    |   |   |   |                     |                     |   |   |   |   |                     |        |   |   |   |   |                     |                     |   |   |   |   |                     |        |    |   |   |   |                     |                     |    |   |   |   |                     |        |    |   |   |   |                     |                     |   |   |   |   |                     |        |    |   |   |   |                     |                     |   |   |   |   |                     |        |    |   |   |   |                     |                     |   |   |   |   |                     |        |   |   |   |   |                     |                     |   |   |   |   |                     |        |    |   |   |   |                     |                     |   |   |   |   |                     |        |   |   |   |   |                     |                     |   |   |   |   |                     |        |    |   |   |   |                     |                     |   |   |   |   |                     |        |   |   |   |   |                     |                     |   |   |   |   |                     |        |   |   |   |   |                     |                     |   |   |   |   |
| 1.6870 <sub>1</sub>                                                                                    | 54.337 | 4                                                                           | 2                                                                                                                                                                                                                                                                                                                                                                                                                                                                                                                                                                                                                                                                                                                                                                                                                                                                                                                                                                                                                                                                                                                                                                                                                                                                                                                                                                                                                                                                                                                                                                                                                                                                                                                                                                                                                                                                                                                                                                                                                                                                                                                                                                                                                                                                                                                                                                                                                                                                                                                                                                                                                                                                                                                                                                                                                                                                                                                                                                                                                                                                                                                                                                                                                                                                                                                                                                                                                                                                                                                                                                                                                                                                                                                                                                                                                                                                                                                                                                                                                                                                                                                                                                                                                                                                                                                                                                                                                                                                                                                                                                                                                                                                                                                                                                                                                                                                                                                                                                                                                                                                                                                                                                                                                                                                                                                                                                                                                             | 1 | 0 | 1.0290 <sub>0</sub> | 96.937              | 2        | 0 | 2 | 5 |  |  |  |   |    |          |   |   |   |   |    |          |   |   |   |                     |        |     |   |   |   |                     |        |    |   |   |   |                     |        |     |   |   |   |                     |        |    |   |   |   |                     |        |    |   |   |   |                     |        |   |   |   |   |                     |        |    |   |   |   |                     |        |    |   |   |   |                     |        |    |   |   |   |                     |        |   |   |   |  |                     |        |    |   |   |   |                     |        |    |   |   |   |                     |        |    |   |   |   |                     |        |   |   |   |   |                     |        |     |   |   |   |                     |        |   |   |   |   |                     |        |   |   |   |   |                     |        |   |   |   |   |                     |        |    |   |   |   |                     |        |   |   |   |   |                     |        |   |   |   |   |                     |        |   |   |   |   |                     |        |    |   |   |   |                     |        |   |   |   |   |                     |        |   |   |   |   |                     |        |   |   |   |   |                     |        |    |   |   |   |                     |                     |   |   |   |   |                     |        |    |   |   |   |                     |                     |   |   |   |   |                     |        |    |   |   |   |                     |                     |   |   |   |   |                     |        |    |   |   |   |                     |                     |   |   |   |   |                     |        |   |   |   |   |                     |                     |   |   |   |   |                     |        |    |   |   |   |                     |                     |    |   |   |   |                     |        |    |   |   |   |                     |                     |   |   |   |   |                     |        |    |   |   |   |                     |                     |   |   |   |   |                     |        |    |   |   |   |                     |                     |   |   |   |   |                     |        |   |   |   |   |                     |                     |   |   |   |   |                     |        |    |   |   |   |                     |                     |   |   |   |   |                     |        |   |   |   |   |                     |                     |   |   |   |   |                     |        |    |   |   |   |                     |                     |   |   |   |   |                     |        |   |   |   |   |                     |                     |   |   |   |   |                     |        |   |   |   |   |                     |                     |   |   |   |   |
| 1.6198 <sub>4</sub>                                                                                    | 56.789 | 51                                                                          | 1                                                                                                                                                                                                                                                                                                                                                                                                                                                                                                                                                                                                                                                                                                                                                                                                                                                                                                                                                                                                                                                                                                                                                                                                                                                                                                                                                                                                                                                                                                                                                                                                                                                                                                                                                                                                                                                                                                                                                                                                                                                                                                                                                                                                                                                                                                                                                                                                                                                                                                                                                                                                                                                                                                                                                                                                                                                                                                                                                                                                                                                                                                                                                                                                                                                                                                                                                                                                                                                                                                                                                                                                                                                                                                                                                                                                                                                                                                                                                                                                                                                                                                                                                                                                                                                                                                                                                                                                                                                                                                                                                                                                                                                                                                                                                                                                                                                                                                                                                                                                                                                                                                                                                                                                                                                                                                                                                                                                                             | 2 | 1 | 1.0239 <sub>8</sub> | 97.574              | 4        | 3 | 2 | 0 |  |  |  |   |    |          |   |   |   |   |    |          |   |   |   |                     |        |     |   |   |   |                     |        |    |   |   |   |                     |        |     |   |   |   |                     |        |    |   |   |   |                     |        |    |   |   |   |                     |        |   |   |   |   |                     |        |    |   |   |   |                     |        |    |   |   |   |                     |        |    |   |   |   |                     |        |   |   |   |  |                     |        |    |   |   |   |                     |        |    |   |   |   |                     |        |    |   |   |   |                     |        |   |   |   |   |                     |        |     |   |   |   |                     |        |   |   |   |   |                     |        |   |   |   |   |                     |        |   |   |   |   |                     |        |    |   |   |   |                     |        |   |   |   |   |                     |        |   |   |   |   |                     |        |   |   |   |   |                     |        |    |   |   |   |                     |        |   |   |   |   |                     |        |   |   |   |   |                     |        |   |   |   |   |                     |        |    |   |   |   |                     |                     |   |   |   |   |                     |        |    |   |   |   |                     |                     |   |   |   |   |                     |        |    |   |   |   |                     |                     |   |   |   |   |                     |        |    |   |   |   |                     |                     |   |   |   |   |                     |        |   |   |   |   |                     |                     |   |   |   |   |                     |        |    |   |   |   |                     |                     |    |   |   |   |                     |        |    |   |   |   |                     |                     |   |   |   |   |                     |        |    |   |   |   |                     |                     |   |   |   |   |                     |        |    |   |   |   |                     |                     |   |   |   |   |                     |        |   |   |   |   |                     |                     |   |   |   |   |                     |        |    |   |   |   |                     |                     |   |   |   |   |                     |        |   |   |   |   |                     |                     |   |   |   |   |                     |        |    |   |   |   |                     |                     |   |   |   |   |                     |        |   |   |   |   |                     |                     |   |   |   |   |                     |        |   |   |   |   |                     |                     |   |   |   |   |
| 1.5461 <sub>6</sub>                                                                                    | 59.762 | 9                                                                           | 1                                                                                                                                                                                                                                                                                                                                                                                                                                                                                                                                                                                                                                                                                                                                                                                                                                                                                                                                                                                                                                                                                                                                                                                                                                                                                                                                                                                                                                                                                                                                                                                                                                                                                                                                                                                                                                                                                                                                                                                                                                                                                                                                                                                                                                                                                                                                                                                                                                                                                                                                                                                                                                                                                                                                                                                                                                                                                                                                                                                                                                                                                                                                                                                                                                                                                                                                                                                                                                                                                                                                                                                                                                                                                                                                                                                                                                                                                                                                                                                                                                                                                                                                                                                                                                                                                                                                                                                                                                                                                                                                                                                                                                                                                                                                                                                                                                                                                                                                                                                                                                                                                                                                                                                                                                                                                                                                                                                                                             | 1 | 3 | 1.0083 <sub>7</sub> | 99.619              | 7        | 2 | 3 | 1 |  |  |  |   |    |          |   |   |   |   |    |          |   |   |   |                     |        |     |   |   |   |                     |        |    |   |   |   |                     |        |     |   |   |   |                     |        |    |   |   |   |                     |        |    |   |   |   |                     |        |   |   |   |   |                     |        |    |   |   |   |                     |        |    |   |   |   |                     |        |    |   |   |   |                     |        |   |   |   |  |                     |        |    |   |   |   |                     |        |    |   |   |   |                     |        |    |   |   |   |                     |        |   |   |   |   |                     |        |     |   |   |   |                     |        |   |   |   |   |                     |        |   |   |   |   |                     |        |   |   |   |   |                     |        |    |   |   |   |                     |        |   |   |   |   |                     |        |   |   |   |   |                     |        |   |   |   |   |                     |        |    |   |   |   |                     |        |   |   |   |   |                     |        |   |   |   |   |                     |        |   |   |   |   |                     |        |    |   |   |   |                     |                     |   |   |   |   |                     |        |    |   |   |   |                     |                     |   |   |   |   |                     |        |    |   |   |   |                     |                     |   |   |   |   |                     |        |    |   |   |   |                     |                     |   |   |   |   |                     |        |   |   |   |   |                     |                     |   |   |   |   |                     |        |    |   |   |   |                     |                     |    |   |   |   |                     |        |    |   |   |   |                     |                     |   |   |   |   |                     |        |    |   |   |   |                     |                     |   |   |   |   |                     |        |    |   |   |   |                     |                     |   |   |   |   |                     |        |   |   |   |   |                     |                     |   |   |   |   |                     |        |    |   |   |   |                     |                     |   |   |   |   |                     |        |   |   |   |   |                     |                     |   |   |   |   |                     |        |    |   |   |   |                     |                     |   |   |   |   |                     |        |   |   |   |   |                     |                     |   |   |   |   |                     |        |   |   |   |   |                     |                     |   |   |   |   |
| 1.4878 <sub>0</sub>                                                                                    | 62.362 | 11                                                                          | 3                                                                                                                                                                                                                                                                                                                                                                                                                                                                                                                                                                                                                                                                                                                                                                                                                                                                                                                                                                                                                                                                                                                                                                                                                                                                                                                                                                                                                                                                                                                                                                                                                                                                                                                                                                                                                                                                                                                                                                                                                                                                                                                                                                                                                                                                                                                                                                                                                                                                                                                                                                                                                                                                                                                                                                                                                                                                                                                                                                                                                                                                                                                                                                                                                                                                                                                                                                                                                                                                                                                                                                                                                                                                                                                                                                                                                                                                                                                                                                                                                                                                                                                                                                                                                                                                                                                                                                                                                                                                                                                                                                                                                                                                                                                                                                                                                                                                                                                                                                                                                                                                                                                                                                                                                                                                                                                                                                                                                             | 0 | 0 | 0.9740 <sub>0</sub> | 104.53 <sub>3</sub> | 2        | 4 | 1 | 0 |  |  |  |   |    |          |   |   |   |   |    |          |   |   |   |                     |        |     |   |   |   |                     |        |    |   |   |   |                     |        |     |   |   |   |                     |        |    |   |   |   |                     |        |    |   |   |   |                     |        |   |   |   |   |                     |        |    |   |   |   |                     |        |    |   |   |   |                     |        |    |   |   |   |                     |        |   |   |   |  |                     |        |    |   |   |   |                     |        |    |   |   |   |                     |        |    |   |   |   |                     |        |   |   |   |   |                     |        |     |   |   |   |                     |        |   |   |   |   |                     |        |   |   |   |   |                     |        |   |   |   |   |                     |        |    |   |   |   |                     |        |   |   |   |   |                     |        |   |   |   |   |                     |        |   |   |   |   |                     |        |    |   |   |   |                     |        |   |   |   |   |                     |        |   |   |   |   |                     |        |   |   |   |   |                     |        |    |   |   |   |                     |                     |   |   |   |   |                     |        |    |   |   |   |                     |                     |   |   |   |   |                     |        |    |   |   |   |                     |                     |   |   |   |   |                     |        |    |   |   |   |                     |                     |   |   |   |   |                     |        |   |   |   |   |                     |                     |   |   |   |   |                     |        |    |   |   |   |                     |                     |    |   |   |   |                     |        |    |   |   |   |                     |                     |   |   |   |   |                     |        |    |   |   |   |                     |                     |   |   |   |   |                     |        |    |   |   |   |                     |                     |   |   |   |   |                     |        |   |   |   |   |                     |                     |   |   |   |   |                     |        |    |   |   |   |                     |                     |   |   |   |   |                     |        |   |   |   |   |                     |                     |   |   |   |   |                     |        |    |   |   |   |                     |                     |   |   |   |   |                     |        |   |   |   |   |                     |                     |   |   |   |   |                     |        |   |   |   |   |                     |                     |   |   |   |   |
| 1.4609 <sub>9</sub>                                                                                    | 63.639 | 68                                                                          | 0                                                                                                                                                                                                                                                                                                                                                                                                                                                                                                                                                                                                                                                                                                                                                                                                                                                                                                                                                                                                                                                                                                                                                                                                                                                                                                                                                                                                                                                                                                                                                                                                                                                                                                                                                                                                                                                                                                                                                                                                                                                                                                                                                                                                                                                                                                                                                                                                                                                                                                                                                                                                                                                                                                                                                                                                                                                                                                                                                                                                                                                                                                                                                                                                                                                                                                                                                                                                                                                                                                                                                                                                                                                                                                                                                                                                                                                                                                                                                                                                                                                                                                                                                                                                                                                                                                                                                                                                                                                                                                                                                                                                                                                                                                                                                                                                                                                                                                                                                                                                                                                                                                                                                                                                                                                                                                                                                                                                                             | 2 | 3 | 0.9663 <sub>5</sub> | 105.71 <sub>3</sub> | 9        | 0 | 0 | 6 |  |  |  |   |    |          |   |   |   |   |    |          |   |   |   |                     |        |     |   |   |   |                     |        |    |   |   |   |                     |        |     |   |   |   |                     |        |    |   |   |   |                     |        |    |   |   |   |                     |        |   |   |   |   |                     |        |    |   |   |   |                     |        |    |   |   |   |                     |        |    |   |   |   |                     |        |   |   |   |  |                     |        |    |   |   |   |                     |        |    |   |   |   |                     |        |    |   |   |   |                     |        |   |   |   |   |                     |        |     |   |   |   |                     |        |   |   |   |   |                     |        |   |   |   |   |                     |        |   |   |   |   |                     |        |    |   |   |   |                     |        |   |   |   |   |                     |        |   |   |   |   |                     |        |   |   |   |   |                     |        |    |   |   |   |                     |        |   |   |   |   |                     |        |   |   |   |   |                     |        |   |   |   |   |                     |        |    |   |   |   |                     |                     |   |   |   |   |                     |        |    |   |   |   |                     |                     |   |   |   |   |                     |        |    |   |   |   |                     |                     |   |   |   |   |                     |        |    |   |   |   |                     |                     |   |   |   |   |                     |        |   |   |   |   |                     |                     |   |   |   |   |                     |        |    |   |   |   |                     |                     |    |   |   |   |                     |        |    |   |   |   |                     |                     |   |   |   |   |                     |        |    |   |   |   |                     |                     |   |   |   |   |                     |        |    |   |   |   |                     |                     |   |   |   |   |                     |        |   |   |   |   |                     |                     |   |   |   |   |                     |        |    |   |   |   |                     |                     |   |   |   |   |                     |        |   |   |   |   |                     |                     |   |   |   |   |                     |        |    |   |   |   |                     |                     |   |   |   |   |                     |        |   |   |   |   |                     |                     |   |   |   |   |                     |        |   |   |   |   |                     |                     |   |   |   |   |
| 1.4581 <sub>0</sub>                                                                                    | 63.780 | 49                                                                          | 1                                                                                                                                                                                                                                                                                                                                                                                                                                                                                                                                                                                                                                                                                                                                                                                                                                                                                                                                                                                                                                                                                                                                                                                                                                                                                                                                                                                                                                                                                                                                                                                                                                                                                                                                                                                                                                                                                                                                                                                                                                                                                                                                                                                                                                                                                                                                                                                                                                                                                                                                                                                                                                                                                                                                                                                                                                                                                                                                                                                                                                                                                                                                                                                                                                                                                                                                                                                                                                                                                                                                                                                                                                                                                                                                                                                                                                                                                                                                                                                                                                                                                                                                                                                                                                                                                                                                                                                                                                                                                                                                                                                                                                                                                                                                                                                                                                                                                                                                                                                                                                                                                                                                                                                                                                                                                                                                                                                                                             | 2 | 2 | 0.9663 <sub>5</sub> | 105.71 <sub>2</sub> | 9        | 0 | 4 | 3 |  |  |  |   |    |          |   |   |   |   |    |          |   |   |   |                     |        |     |   |   |   |                     |        |    |   |   |   |                     |        |     |   |   |   |                     |        |    |   |   |   |                     |        |    |   |   |   |                     |        |   |   |   |   |                     |        |    |   |   |   |                     |        |    |   |   |   |                     |        |    |   |   |   |                     |        |   |   |   |  |                     |        |    |   |   |   |                     |        |    |   |   |   |                     |        |    |   |   |   |                     |        |   |   |   |   |                     |        |     |   |   |   |                     |        |   |   |   |   |                     |        |   |   |   |   |                     |        |   |   |   |   |                     |        |    |   |   |   |                     |        |   |   |   |   |                     |        |   |   |   |   |                     |        |   |   |   |   |                     |        |    |   |   |   |                     |        |   |   |   |   |                     |        |   |   |   |   |                     |        |   |   |   |   |                     |        |    |   |   |   |                     |                     |   |   |   |   |                     |        |    |   |   |   |                     |                     |   |   |   |   |                     |        |    |   |   |   |                     |                     |   |   |   |   |                     |        |    |   |   |   |                     |                     |   |   |   |   |                     |        |   |   |   |   |                     |                     |   |   |   |   |                     |        |    |   |   |   |                     |                     |    |   |   |   |                     |        |    |   |   |   |                     |                     |   |   |   |   |                     |        |    |   |   |   |                     |                     |   |   |   |   |                     |        |    |   |   |   |                     |                     |   |   |   |   |                     |        |   |   |   |   |                     |                     |   |   |   |   |                     |        |    |   |   |   |                     |                     |   |   |   |   |                     |        |   |   |   |   |                     |                     |   |   |   |   |                     |        |    |   |   |   |                     |                     |   |   |   |   |                     |        |   |   |   |   |                     |                     |   |   |   |   |                     |        |   |   |   |   |                     |                     |   |   |   |   |
| 1.4411 <sub>1</sub>                                                                                    | 64.622 | 20                                                                          | 0                                                                                                                                                                                                                                                                                                                                                                                                                                                                                                                                                                                                                                                                                                                                                                                                                                                                                                                                                                                                                                                                                                                                                                                                                                                                                                                                                                                                                                                                                                                                                                                                                                                                                                                                                                                                                                                                                                                                                                                                                                                                                                                                                                                                                                                                                                                                                                                                                                                                                                                                                                                                                                                                                                                                                                                                                                                                                                                                                                                                                                                                                                                                                                                                                                                                                                                                                                                                                                                                                                                                                                                                                                                                                                                                                                                                                                                                                                                                                                                                                                                                                                                                                                                                                                                                                                                                                                                                                                                                                                                                                                                                                                                                                                                                                                                                                                                                                                                                                                                                                                                                                                                                                                                                                                                                                                                                                                                                                             | 3 | 1 | 0.9655 <sub>2</sub> | 105.84 <sub>3</sub> | 9        | 3 | 2 | 2 |  |  |  |   |    |          |   |   |   |   |    |          |   |   |   |                     |        |     |   |   |   |                     |        |    |   |   |   |                     |        |     |   |   |   |                     |        |    |   |   |   |                     |        |    |   |   |   |                     |        |   |   |   |   |                     |        |    |   |   |   |                     |        |    |   |   |   |                     |        |    |   |   |   |                     |        |   |   |   |  |                     |        |    |   |   |   |                     |        |    |   |   |   |                     |        |    |   |   |   |                     |        |   |   |   |   |                     |        |     |   |   |   |                     |        |   |   |   |   |                     |        |   |   |   |   |                     |        |   |   |   |   |                     |        |    |   |   |   |                     |        |   |   |   |   |                     |        |   |   |   |   |                     |        |   |   |   |   |                     |        |    |   |   |   |                     |        |   |   |   |   |                     |        |   |   |   |   |                     |        |   |   |   |   |                     |        |    |   |   |   |                     |                     |   |   |   |   |                     |        |    |   |   |   |                     |                     |   |   |   |   |                     |        |    |   |   |   |                     |                     |   |   |   |   |                     |        |    |   |   |   |                     |                     |   |   |   |   |                     |        |   |   |   |   |                     |                     |   |   |   |   |                     |        |    |   |   |   |                     |                     |    |   |   |   |                     |        |    |   |   |   |                     |                     |   |   |   |   |                     |        |    |   |   |   |                     |                     |   |   |   |   |                     |        |    |   |   |   |                     |                     |   |   |   |   |                     |        |   |   |   |   |                     |                     |   |   |   |   |                     |        |    |   |   |   |                     |                     |   |   |   |   |                     |        |   |   |   |   |                     |                     |   |   |   |   |                     |        |    |   |   |   |                     |                     |   |   |   |   |                     |        |   |   |   |   |                     |                     |   |   |   |   |                     |        |   |   |   |   |                     |                     |   |   |   |   |
| 1.3786 <sub>5</sub>                                                                                    | 67.937 | 7                                                                           | 1                                                                                                                                                                                                                                                                                                                                                                                                                                                                                                                                                                                                                                                                                                                                                                                                                                                                                                                                                                                                                                                                                                                                                                                                                                                                                                                                                                                                                                                                                                                                                                                                                                                                                                                                                                                                                                                                                                                                                                                                                                                                                                                                                                                                                                                                                                                                                                                                                                                                                                                                                                                                                                                                                                                                                                                                                                                                                                                                                                                                                                                                                                                                                                                                                                                                                                                                                                                                                                                                                                                                                                                                                                                                                                                                                                                                                                                                                                                                                                                                                                                                                                                                                                                                                                                                                                                                                                                                                                                                                                                                                                                                                                                                                                                                                                                                                                                                                                                                                                                                                                                                                                                                                                                                                                                                                                                                                                                                                             | 0 | 4 | 0.9630 <sub>2</sub> | 106.23 <sub>8</sub> | 2        | 2 | 2 | 4 |  |  |  |   |    |          |   |   |   |   |    |          |   |   |   |                     |        |     |   |   |   |                     |        |    |   |   |   |                     |        |     |   |   |   |                     |        |    |   |   |   |                     |        |    |   |   |   |                     |        |   |   |   |   |                     |        |    |   |   |   |                     |        |    |   |   |   |                     |        |    |   |   |   |                     |        |   |   |   |  |                     |        |    |   |   |   |                     |        |    |   |   |   |                     |        |    |   |   |   |                     |        |   |   |   |   |                     |        |     |   |   |   |                     |        |   |   |   |   |                     |        |   |   |   |   |                     |        |   |   |   |   |                     |        |    |   |   |   |                     |        |   |   |   |   |                     |        |   |   |   |   |                     |        |   |   |   |   |                     |        |    |   |   |   |                     |        |   |   |   |   |                     |        |   |   |   |   |                     |        |   |   |   |   |                     |        |    |   |   |   |                     |                     |   |   |   |   |                     |        |    |   |   |   |                     |                     |   |   |   |   |                     |        |    |   |   |   |                     |                     |   |   |   |   |                     |        |    |   |   |   |                     |                     |   |   |   |   |                     |        |   |   |   |   |                     |                     |   |   |   |   |                     |        |    |   |   |   |                     |                     |    |   |   |   |                     |        |    |   |   |   |                     |                     |   |   |   |   |                     |        |    |   |   |   |                     |                     |   |   |   |   |                     |        |    |   |   |   |                     |                     |   |   |   |   |                     |        |   |   |   |   |                     |                     |   |   |   |   |                     |        |    |   |   |   |                     |                     |   |   |   |   |                     |        |   |   |   |   |                     |                     |   |   |   |   |                     |        |    |   |   |   |                     |                     |   |   |   |   |                     |        |   |   |   |   |                     |                     |   |   |   |   |                     |        |   |   |   |   |                     |                     |   |   |   |   |
| 1.3236 <sub>7</sub>                                                                                    | 71.175 | 14                                                                          | 0                                                                                                                                                                                                                                                                                                                                                                                                                                                                                                                                                                                                                                                                                                                                                                                                                                                                                                                                                                                                                                                                                                                                                                                                                                                                                                                                                                                                                                                                                                                                                                                                                                                                                                                                                                                                                                                                                                                                                                                                                                                                                                                                                                                                                                                                                                                                                                                                                                                                                                                                                                                                                                                                                                                                                                                                                                                                                                                                                                                                                                                                                                                                                                                                                                                                                                                                                                                                                                                                                                                                                                                                                                                                                                                                                                                                                                                                                                                                                                                                                                                                                                                                                                                                                                                                                                                                                                                                                                                                                                                                                                                                                                                                                                                                                                                                                                                                                                                                                                                                                                                                                                                                                                                                                                                                                                                                                                                                                             | 3 | 2 | 0.9605 <sub>4</sub> | 106.63 <sub>3</sub> | 10       | 1 | 4 | 1 |  |  |  |   |    |          |   |   |   |   |    |          |   |   |   |                     |        |     |   |   |   |                     |        |    |   |   |   |                     |        |     |   |   |   |                     |        |    |   |   |   |                     |        |    |   |   |   |                     |        |   |   |   |   |                     |        |    |   |   |   |                     |        |    |   |   |   |                     |        |    |   |   |   |                     |        |   |   |   |  |                     |        |    |   |   |   |                     |        |    |   |   |   |                     |        |    |   |   |   |                     |        |   |   |   |   |                     |        |     |   |   |   |                     |        |   |   |   |   |                     |        |   |   |   |   |                     |        |   |   |   |   |                     |        |    |   |   |   |                     |        |   |   |   |   |                     |        |   |   |   |   |                     |        |   |   |   |   |                     |        |    |   |   |   |                     |        |   |   |   |   |                     |        |   |   |   |   |                     |        |   |   |   |   |                     |        |    |   |   |   |                     |                     |   |   |   |   |                     |        |    |   |   |   |                     |                     |   |   |   |   |                     |        |    |   |   |   |                     |                     |   |   |   |   |                     |        |    |   |   |   |                     |                     |   |   |   |   |                     |        |   |   |   |   |                     |                     |   |   |   |   |                     |        |    |   |   |   |                     |                     |    |   |   |   |                     |        |    |   |   |   |                     |                     |   |   |   |   |                     |        |    |   |   |   |                     |                     |   |   |   |   |                     |        |    |   |   |   |                     |                     |   |   |   |   |                     |        |   |   |   |   |                     |                     |   |   |   |   |                     |        |    |   |   |   |                     |                     |   |   |   |   |                     |        |   |   |   |   |                     |                     |   |   |   |   |                     |        |    |   |   |   |                     |                     |   |   |   |   |                     |        |   |   |   |   |                     |                     |   |   |   |   |                     |        |   |   |   |   |                     |                     |   |   |   |   |
| 1.2884 <sub>8</sub>                                                                                    | 73.430 | 13                                                                          | 2                                                                                                                                                                                                                                                                                                                                                                                                                                                                                                                                                                                                                                                                                                                                                                                                                                                                                                                                                                                                                                                                                                                                                                                                                                                                                                                                                                                                                                                                                                                                                                                                                                                                                                                                                                                                                                                                                                                                                                                                                                                                                                                                                                                                                                                                                                                                                                                                                                                                                                                                                                                                                                                                                                                                                                                                                                                                                                                                                                                                                                                                                                                                                                                                                                                                                                                                                                                                                                                                                                                                                                                                                                                                                                                                                                                                                                                                                                                                                                                                                                                                                                                                                                                                                                                                                                                                                                                                                                                                                                                                                                                                                                                                                                                                                                                                                                                                                                                                                                                                                                                                                                                                                                                                                                                                                                                                                                                                                             | 2 | 0 | 0.9556 <sub>3</sub> | 107.42 <sub>7</sub> | 7        | 1 | 2 | 5 |  |  |  |   |    |          |   |   |   |   |    |          |   |   |   |                     |        |     |   |   |   |                     |        |    |   |   |   |                     |        |     |   |   |   |                     |        |    |   |   |   |                     |        |    |   |   |   |                     |        |   |   |   |   |                     |        |    |   |   |   |                     |        |    |   |   |   |                     |        |    |   |   |   |                     |        |   |   |   |  |                     |        |    |   |   |   |                     |        |    |   |   |   |                     |        |    |   |   |   |                     |        |   |   |   |   |                     |        |     |   |   |   |                     |        |   |   |   |   |                     |        |   |   |   |   |                     |        |   |   |   |   |                     |        |    |   |   |   |                     |        |   |   |   |   |                     |        |   |   |   |   |                     |        |   |   |   |   |                     |        |    |   |   |   |                     |        |   |   |   |   |                     |        |   |   |   |   |                     |        |   |   |   |   |                     |        |    |   |   |   |                     |                     |   |   |   |   |                     |        |    |   |   |   |                     |                     |   |   |   |   |                     |        |    |   |   |   |                     |                     |   |   |   |   |                     |        |    |   |   |   |                     |                     |   |   |   |   |                     |        |   |   |   |   |                     |                     |   |   |   |   |                     |        |    |   |   |   |                     |                     |    |   |   |   |                     |        |    |   |   |   |                     |                     |   |   |   |   |                     |        |    |   |   |   |                     |                     |   |   |   |   |                     |        |    |   |   |   |                     |                     |   |   |   |   |                     |        |   |   |   |   |                     |                     |   |   |   |   |                     |        |    |   |   |   |                     |                     |   |   |   |   |                     |        |   |   |   |   |                     |                     |   |   |   |   |                     |        |    |   |   |   |                     |                     |   |   |   |   |                     |        |   |   |   |   |                     |                     |   |   |   |   |                     |        |   |   |   |   |                     |                     |   |   |   |   |
| 1.2709 <sub>4</sub>                                                                                    | 74.614 | 26                                                                          | 1                                                                                                                                                                                                                                                                                                                                                                                                                                                                                                                                                                                                                                                                                                                                                                                                                                                                                                                                                                                                                                                                                                                                                                                                                                                                                                                                                                                                                                                                                                                                                                                                                                                                                                                                                                                                                                                                                                                                                                                                                                                                                                                                                                                                                                                                                                                                                                                                                                                                                                                                                                                                                                                                                                                                                                                                                                                                                                                                                                                                                                                                                                                                                                                                                                                                                                                                                                                                                                                                                                                                                                                                                                                                                                                                                                                                                                                                                                                                                                                                                                                                                                                                                                                                                                                                                                                                                                                                                                                                                                                                                                                                                                                                                                                                                                                                                                                                                                                                                                                                                                                                                                                                                                                                                                                                                                                                                                                                                             | 2 | 3 | 0.9444 <sub>7</sub> | 109.29 <sub>2</sub> | 3        | 1 | 0 | 6 |  |  |  |   |    |          |   |   |   |   |    |          |   |   |   |                     |        |     |   |   |   |                     |        |    |   |   |   |                     |        |     |   |   |   |                     |        |    |   |   |   |                     |        |    |   |   |   |                     |        |   |   |   |   |                     |        |    |   |   |   |                     |        |    |   |   |   |                     |        |    |   |   |   |                     |        |   |   |   |  |                     |        |    |   |   |   |                     |        |    |   |   |   |                     |        |    |   |   |   |                     |        |   |   |   |   |                     |        |     |   |   |   |                     |        |   |   |   |   |                     |        |   |   |   |   |                     |        |   |   |   |   |                     |        |    |   |   |   |                     |        |   |   |   |   |                     |        |   |   |   |   |                     |        |   |   |   |   |                     |        |    |   |   |   |                     |        |   |   |   |   |                     |        |   |   |   |   |                     |        |   |   |   |   |                     |        |    |   |   |   |                     |                     |   |   |   |   |                     |        |    |   |   |   |                     |                     |   |   |   |   |                     |        |    |   |   |   |                     |                     |   |   |   |   |                     |        |    |   |   |   |                     |                     |   |   |   |   |                     |        |   |   |   |   |                     |                     |   |   |   |   |                     |        |    |   |   |   |                     |                     |    |   |   |   |                     |        |    |   |   |   |                     |                     |   |   |   |   |                     |        |    |   |   |   |                     |                     |   |   |   |   |                     |        |    |   |   |   |                     |                     |   |   |   |   |                     |        |   |   |   |   |                     |                     |   |   |   |   |                     |        |    |   |   |   |                     |                     |   |   |   |   |                     |        |   |   |   |   |                     |                     |   |   |   |   |                     |        |    |   |   |   |                     |                     |   |   |   |   |                     |        |   |   |   |   |                     |                     |   |   |   |   |                     |        |   |   |   |   |                     |                     |   |   |   |   |
| 1.2633 <sub>7</sub>                                                                                    | 75.138 | 25                                                                          | 1                                                                                                                                                                                                                                                                                                                                                                                                                                                                                                                                                                                                                                                                                                                                                                                                                                                                                                                                                                                                                                                                                                                                                                                                                                                                                                                                                                                                                                                                                                                                                                                                                                                                                                                                                                                                                                                                                                                                                                                                                                                                                                                                                                                                                                                                                                                                                                                                                                                                                                                                                                                                                                                                                                                                                                                                                                                                                                                                                                                                                                                                                                                                                                                                                                                                                                                                                                                                                                                                                                                                                                                                                                                                                                                                                                                                                                                                                                                                                                                                                                                                                                                                                                                                                                                                                                                                                                                                                                                                                                                                                                                                                                                                                                                                                                                                                                                                                                                                                                                                                                                                                                                                                                                                                                                                                                                                                                                                                             | 1 | 4 | 0.9413 <sub>5</sub> | 109.82 <sub>8</sub> | 5        | 3 | 1 | 4 |  |  |  |   |    |          |   |   |   |   |    |          |   |   |   |                     |        |     |   |   |   |                     |        |    |   |   |   |                     |        |     |   |   |   |                     |        |    |   |   |   |                     |        |    |   |   |   |                     |        |   |   |   |   |                     |        |    |   |   |   |                     |        |    |   |   |   |                     |        |    |   |   |   |                     |        |   |   |   |  |                     |        |    |   |   |   |                     |        |    |   |   |   |                     |        |    |   |   |   |                     |        |   |   |   |   |                     |        |     |   |   |   |                     |        |   |   |   |   |                     |        |   |   |   |   |                     |        |   |   |   |   |                     |        |    |   |   |   |                     |        |   |   |   |   |                     |        |   |   |   |   |                     |        |   |   |   |   |                     |        |    |   |   |   |                     |        |   |   |   |   |                     |        |   |   |   |   |                     |        |   |   |   |   |                     |        |    |   |   |   |                     |                     |   |   |   |   |                     |        |    |   |   |   |                     |                     |   |   |   |   |                     |        |    |   |   |   |                     |                     |   |   |   |   |                     |        |    |   |   |   |                     |                     |   |   |   |   |                     |        |   |   |   |   |                     |                     |   |   |   |   |                     |        |    |   |   |   |                     |                     |    |   |   |   |                     |        |    |   |   |   |                     |                     |   |   |   |   |                     |        |    |   |   |   |                     |                     |   |   |   |   |                     |        |    |   |   |   |                     |                     |   |   |   |   |                     |        |   |   |   |   |                     |                     |   |   |   |   |                     |        |    |   |   |   |                     |                     |   |   |   |   |                     |        |   |   |   |   |                     |                     |   |   |   |   |                     |        |    |   |   |   |                     |                     |   |   |   |   |                     |        |   |   |   |   |                     |                     |   |   |   |   |                     |        |   |   |   |   |                     |                     |   |   |   |   |
| 1.2577 <sub>9</sub>                                                                                    | 75.530 | 5                                                                           | 2                                                                                                                                                                                                                                                                                                                                                                                                                                                                                                                                                                                                                                                                                                                                                                                                                                                                                                                                                                                                                                                                                                                                                                                                                                                                                                                                                                                                                                                                                                                                                                                                                                                                                                                                                                                                                                                                                                                                                                                                                                                                                                                                                                                                                                                                                                                                                                                                                                                                                                                                                                                                                                                                                                                                                                                                                                                                                                                                                                                                                                                                                                                                                                                                                                                                                                                                                                                                                                                                                                                                                                                                                                                                                                                                                                                                                                                                                                                                                                                                                                                                                                                                                                                                                                                                                                                                                                                                                                                                                                                                                                                                                                                                                                                                                                                                                                                                                                                                                                                                                                                                                                                                                                                                                                                                                                                                                                                                                             | 2 | 1 | 0.9232 <sub>8</sub> | 113.08 <sub>8</sub> | 5        | 1 | 4 | 2 |  |  |  |   |    |          |   |   |   |   |    |          |   |   |   |                     |        |     |   |   |   |                     |        |    |   |   |   |                     |        |     |   |   |   |                     |        |    |   |   |   |                     |        |    |   |   |   |                     |        |   |   |   |   |                     |        |    |   |   |   |                     |        |    |   |   |   |                     |        |    |   |   |   |                     |        |   |   |   |  |                     |        |    |   |   |   |                     |        |    |   |   |   |                     |        |    |   |   |   |                     |        |   |   |   |   |                     |        |     |   |   |   |                     |        |   |   |   |   |                     |        |   |   |   |   |                     |        |   |   |   |   |                     |        |    |   |   |   |                     |        |   |   |   |   |                     |        |   |   |   |   |                     |        |   |   |   |   |                     |        |    |   |   |   |                     |        |   |   |   |   |                     |        |   |   |   |   |                     |        |   |   |   |   |                     |        |    |   |   |   |                     |                     |   |   |   |   |                     |        |    |   |   |   |                     |                     |   |   |   |   |                     |        |    |   |   |   |                     |                     |   |   |   |   |                     |        |    |   |   |   |                     |                     |   |   |   |   |                     |        |   |   |   |   |                     |                     |   |   |   |   |                     |        |    |   |   |   |                     |                     |    |   |   |   |                     |        |    |   |   |   |                     |                     |   |   |   |   |                     |        |    |   |   |   |                     |                     |   |   |   |   |                     |        |    |   |   |   |                     |                     |   |   |   |   |                     |        |   |   |   |   |                     |                     |   |   |   |   |                     |        |    |   |   |   |                     |                     |   |   |   |   |                     |        |   |   |   |   |                     |                     |   |   |   |   |                     |        |    |   |   |   |                     |                     |   |   |   |   |                     |        |   |   |   |   |                     |                     |   |   |   |   |                     |        |   |   |   |   |                     |                     |   |   |   |   |
| 1.2379 <sub>3</sub>                                                                                    | 76.961 | 13                                                                          | 3                                                                                                                                                                                                                                                                                                                                                                                                                                                                                                                                                                                                                                                                                                                                                                                                                                                                                                                                                                                                                                                                                                                                                                                                                                                                                                                                                                                                                                                                                                                                                                                                                                                                                                                                                                                                                                                                                                                                                                                                                                                                                                                                                                                                                                                                                                                                                                                                                                                                                                                                                                                                                                                                                                                                                                                                                                                                                                                                                                                                                                                                                                                                                                                                                                                                                                                                                                                                                                                                                                                                                                                                                                                                                                                                                                                                                                                                                                                                                                                                                                                                                                                                                                                                                                                                                                                                                                                                                                                                                                                                                                                                                                                                                                                                                                                                                                                                                                                                                                                                                                                                                                                                                                                                                                                                                                                                                                                                                             | 1 | 0 | 0.9146 <sub>2</sub> | 114.74 <sub>8</sub> | 3        | 0 | 3 | 5 |  |  |  |   |    |          |   |   |   |   |    |          |   |   |   |                     |        |     |   |   |   |                     |        |    |   |   |   |                     |        |     |   |   |   |                     |        |    |   |   |   |                     |        |    |   |   |   |                     |        |   |   |   |   |                     |        |    |   |   |   |                     |        |    |   |   |   |                     |        |    |   |   |   |                     |        |   |   |   |  |                     |        |    |   |   |   |                     |        |    |   |   |   |                     |        |    |   |   |   |                     |        |   |   |   |   |                     |        |     |   |   |   |                     |        |   |   |   |   |                     |        |   |   |   |   |                     |        |   |   |   |   |                     |        |    |   |   |   |                     |        |   |   |   |   |                     |        |   |   |   |   |                     |        |   |   |   |   |                     |        |    |   |   |   |                     |        |   |   |   |   |                     |        |   |   |   |   |                     |        |   |   |   |   |                     |        |    |   |   |   |                     |                     |   |   |   |   |                     |        |    |   |   |   |                     |                     |   |   |   |   |                     |        |    |   |   |   |                     |                     |   |   |   |   |                     |        |    |   |   |   |                     |                     |   |   |   |   |                     |        |   |   |   |   |                     |                     |   |   |   |   |                     |        |    |   |   |   |                     |                     |    |   |   |   |                     |        |    |   |   |   |                     |                     |   |   |   |   |                     |        |    |   |   |   |                     |                     |   |   |   |   |                     |        |    |   |   |   |                     |                     |   |   |   |   |                     |        |   |   |   |   |                     |                     |   |   |   |   |                     |        |    |   |   |   |                     |                     |   |   |   |   |                     |        |   |   |   |   |                     |                     |   |   |   |   |                     |        |    |   |   |   |                     |                     |   |   |   |   |                     |        |   |   |   |   |                     |                     |   |   |   |   |                     |        |   |   |   |   |                     |                     |   |   |   |   |
| 1.2156 <sub>1</sub>                                                                                    | 78.643 | 5                                                                           | 2                                                                                                                                                                                                                                                                                                                                                                                                                                                                                                                                                                                                                                                                                                                                                                                                                                                                                                                                                                                                                                                                                                                                                                                                                                                                                                                                                                                                                                                                                                                                                                                                                                                                                                                                                                                                                                                                                                                                                                                                                                                                                                                                                                                                                                                                                                                                                                                                                                                                                                                                                                                                                                                                                                                                                                                                                                                                                                                                                                                                                                                                                                                                                                                                                                                                                                                                                                                                                                                                                                                                                                                                                                                                                                                                                                                                                                                                                                                                                                                                                                                                                                                                                                                                                                                                                                                                                                                                                                                                                                                                                                                                                                                                                                                                                                                                                                                                                                                                                                                                                                                                                                                                                                                                                                                                                                                                                                                                                             | 0 | 4 | 0.9048 <sub>2</sub> | 116.71 <sub>3</sub> | 2        | 1 | 1 | 6 |  |  |  |   |    |          |   |   |   |   |    |          |   |   |   |                     |        |     |   |   |   |                     |        |    |   |   |   |                     |        |     |   |   |   |                     |        |    |   |   |   |                     |        |    |   |   |   |                     |        |   |   |   |   |                     |        |    |   |   |   |                     |        |    |   |   |   |                     |        |    |   |   |   |                     |        |   |   |   |  |                     |        |    |   |   |   |                     |        |    |   |   |   |                     |        |    |   |   |   |                     |        |   |   |   |   |                     |        |     |   |   |   |                     |        |   |   |   |   |                     |        |   |   |   |   |                     |        |   |   |   |   |                     |        |    |   |   |   |                     |        |   |   |   |   |                     |        |   |   |   |   |                     |        |   |   |   |   |                     |        |    |   |   |   |                     |        |   |   |   |   |                     |        |   |   |   |   |                     |        |   |   |   |   |                     |        |    |   |   |   |                     |                     |   |   |   |   |                     |        |    |   |   |   |                     |                     |   |   |   |   |                     |        |    |   |   |   |                     |                     |   |   |   |   |                     |        |    |   |   |   |                     |                     |   |   |   |   |                     |        |   |   |   |   |                     |                     |   |   |   |   |                     |        |    |   |   |   |                     |                     |    |   |   |   |                     |        |    |   |   |   |                     |                     |   |   |   |   |                     |        |    |   |   |   |                     |                     |   |   |   |   |                     |        |    |   |   |   |                     |                     |   |   |   |   |                     |        |   |   |   |   |                     |                     |   |   |   |   |                     |        |    |   |   |   |                     |                     |   |   |   |   |                     |        |   |   |   |   |                     |                     |   |   |   |   |                     |        |    |   |   |   |                     |                     |   |   |   |   |                     |        |   |   |   |   |                     |                     |   |   |   |   |                     |        |   |   |   |   |                     |                     |   |   |   |   |
| 1.2106 <sub>4</sub>                                                                                    | 79.029 | 28                                                                          | 1                                                                                                                                                                                                                                                                                                                                                                                                                                                                                                                                                                                                                                                                                                                                                                                                                                                                                                                                                                                                                                                                                                                                                                                                                                                                                                                                                                                                                                                                                                                                                                                                                                                                                                                                                                                                                                                                                                                                                                                                                                                                                                                                                                                                                                                                                                                                                                                                                                                                                                                                                                                                                                                                                                                                                                                                                                                                                                                                                                                                                                                                                                                                                                                                                                                                                                                                                                                                                                                                                                                                                                                                                                                                                                                                                                                                                                                                                                                                                                                                                                                                                                                                                                                                                                                                                                                                                                                                                                                                                                                                                                                                                                                                                                                                                                                                                                                                                                                                                                                                                                                                                                                                                                                                                                                                                                                                                                                                                             | 3 | 1 | 0.9048 <sub>3</sub> | 116.71 <sub>2</sub> | 2        | 2 | 3 | 3 |  |  |  |   |    |          |   |   |   |   |    |          |   |   |   |                     |        |     |   |   |   |                     |        |    |   |   |   |                     |        |     |   |   |   |                     |        |    |   |   |   |                     |        |    |   |   |   |                     |        |   |   |   |   |                     |        |    |   |   |   |                     |        |    |   |   |   |                     |        |    |   |   |   |                     |        |   |   |   |  |                     |        |    |   |   |   |                     |        |    |   |   |   |                     |        |    |   |   |   |                     |        |   |   |   |   |                     |        |     |   |   |   |                     |        |   |   |   |   |                     |        |   |   |   |   |                     |        |   |   |   |   |                     |        |    |   |   |   |                     |        |   |   |   |   |                     |        |   |   |   |   |                     |        |   |   |   |   |                     |        |    |   |   |   |                     |        |   |   |   |   |                     |        |   |   |   |   |                     |        |   |   |   |   |                     |        |    |   |   |   |                     |                     |   |   |   |   |                     |        |    |   |   |   |                     |                     |   |   |   |   |                     |        |    |   |   |   |                     |                     |   |   |   |   |                     |        |    |   |   |   |                     |                     |   |   |   |   |                     |        |   |   |   |   |                     |                     |   |   |   |   |                     |        |    |   |   |   |                     |                     |    |   |   |   |                     |        |    |   |   |   |                     |                     |   |   |   |   |                     |        |    |   |   |   |                     |                     |   |   |   |   |                     |        |    |   |   |   |                     |                     |   |   |   |   |                     |        |   |   |   |   |                     |                     |   |   |   |   |                     |        |    |   |   |   |                     |                     |   |   |   |   |                     |        |   |   |   |   |                     |                     |   |   |   |   |                     |        |    |   |   |   |                     |                     |   |   |   |   |                     |        |   |   |   |   |                     |                     |   |   |   |   |                     |        |   |   |   |   |                     |                     |   |   |   |   |
| 1.1789 <sub>4</sub>                                                                                    | 81.594 | 2                                                                           | 0                                                                                                                                                                                                                                                                                                                                                                                                                                                                                                                                                                                                                                                                                                                                                                                                                                                                                                                                                                                                                                                                                                                                                                                                                                                                                                                                                                                                                                                                                                                                                                                                                                                                                                                                                                                                                                                                                                                                                                                                                                                                                                                                                                                                                                                                                                                                                                                                                                                                                                                                                                                                                                                                                                                                                                                                                                                                                                                                                                                                                                                                                                                                                                                                                                                                                                                                                                                                                                                                                                                                                                                                                                                                                                                                                                                                                                                                                                                                                                                                                                                                                                                                                                                                                                                                                                                                                                                                                                                                                                                                                                                                                                                                                                                                                                                                                                                                                                                                                                                                                                                                                                                                                                                                                                                                                                                                                                                                                             | 3 | 3 | 0.8926 <sub>8</sub> | 119.28 <sub>9</sub> | 2        | 5 | 0 | 0 |  |  |  |   |    |          |   |   |   |   |    |          |   |   |   |                     |        |     |   |   |   |                     |        |    |   |   |   |                     |        |     |   |   |   |                     |        |    |   |   |   |                     |        |    |   |   |   |                     |        |   |   |   |   |                     |        |    |   |   |   |                     |        |    |   |   |   |                     |        |    |   |   |   |                     |        |   |   |   |  |                     |        |    |   |   |   |                     |        |    |   |   |   |                     |        |    |   |   |   |                     |        |   |   |   |   |                     |        |     |   |   |   |                     |        |   |   |   |   |                     |        |   |   |   |   |                     |        |   |   |   |   |                     |        |    |   |   |   |                     |        |   |   |   |   |                     |        |   |   |   |   |                     |        |   |   |   |   |                     |        |    |   |   |   |                     |        |   |   |   |   |                     |        |   |   |   |   |                     |        |   |   |   |   |                     |        |    |   |   |   |                     |                     |   |   |   |   |                     |        |    |   |   |   |                     |                     |   |   |   |   |                     |        |    |   |   |   |                     |                     |   |   |   |   |                     |        |    |   |   |   |                     |                     |   |   |   |   |                     |        |   |   |   |   |                     |                     |   |   |   |   |                     |        |    |   |   |   |                     |                     |    |   |   |   |                     |        |    |   |   |   |                     |                     |   |   |   |   |                     |        |    |   |   |   |                     |                     |   |   |   |   |                     |        |    |   |   |   |                     |                     |   |   |   |   |                     |        |   |   |   |   |                     |                     |   |   |   |   |                     |        |    |   |   |   |                     |                     |   |   |   |   |                     |        |   |   |   |   |                     |                     |   |   |   |   |                     |        |    |   |   |   |                     |                     |   |   |   |   |                     |        |   |   |   |   |                     |                     |   |   |   |   |                     |        |   |   |   |   |                     |                     |   |   |   |   |
| 1.1774 <sub>2</sub>                                                                                    | 81.722 | 3                                                                           | 2                                                                                                                                                                                                                                                                                                                                                                                                                                                                                                                                                                                                                                                                                                                                                                                                                                                                                                                                                                                                                                                                                                                                                                                                                                                                                                                                                                                                                                                                                                                                                                                                                                                                                                                                                                                                                                                                                                                                                                                                                                                                                                                                                                                                                                                                                                                                                                                                                                                                                                                                                                                                                                                                                                                                                                                                                                                                                                                                                                                                                                                                                                                                                                                                                                                                                                                                                                                                                                                                                                                                                                                                                                                                                                                                                                                                                                                                                                                                                                                                                                                                                                                                                                                                                                                                                                                                                                                                                                                                                                                                                                                                                                                                                                                                                                                                                                                                                                                                                                                                                                                                                                                                                                                                                                                                                                                                                                                                                             | 2 | 2 | 0.8867 <sub>8</sub> | 120.60 <sub>3</sub> | 5        | 0 | 2 | 6 |  |  |  |   |    |          |   |   |   |   |    |          |   |   |   |                     |        |     |   |   |   |                     |        |    |   |   |   |                     |        |     |   |   |   |                     |        |    |   |   |   |                     |        |    |   |   |   |                     |        |   |   |   |   |                     |        |    |   |   |   |                     |        |    |   |   |   |                     |        |    |   |   |   |                     |        |   |   |   |  |                     |        |    |   |   |   |                     |        |    |   |   |   |                     |        |    |   |   |   |                     |        |   |   |   |   |                     |        |     |   |   |   |                     |        |   |   |   |   |                     |        |   |   |   |   |                     |        |   |   |   |   |                     |        |    |   |   |   |                     |        |   |   |   |   |                     |        |   |   |   |   |                     |        |   |   |   |   |                     |        |    |   |   |   |                     |        |   |   |   |   |                     |        |   |   |   |   |                     |        |   |   |   |   |                     |        |    |   |   |   |                     |                     |   |   |   |   |                     |        |    |   |   |   |                     |                     |   |   |   |   |                     |        |    |   |   |   |                     |                     |   |   |   |   |                     |        |    |   |   |   |                     |                     |   |   |   |   |                     |        |   |   |   |   |                     |                     |   |   |   |   |                     |        |    |   |   |   |                     |                     |    |   |   |   |                     |        |    |   |   |   |                     |                     |   |   |   |   |                     |        |    |   |   |   |                     |                     |   |   |   |   |                     |        |    |   |   |   |                     |                     |   |   |   |   |                     |        |   |   |   |   |                     |                     |   |   |   |   |                     |        |    |   |   |   |                     |                     |   |   |   |   |                     |        |   |   |   |   |                     |                     |   |   |   |   |                     |        |    |   |   |   |                     |                     |   |   |   |   |                     |        |   |   |   |   |                     |                     |   |   |   |   |                     |        |   |   |   |   |                     |                     |   |   |   |   |
| <b>Lattice:</b> Hexagonal                                                                              |        |                                                                             | <b>Mol. weight =</b> 60.08                                                                                                                                                                                                                                                                                                                                                                                                                                                                                                                                                                                                                                                                                                                                                                                                                                                                                                                                                                                                                                                                                                                                                                                                                                                                                                                                                                                                                                                                                                                                                                                                                                                                                                                                                                                                                                                                                                                                                                                                                                                                                                                                                                                                                                                                                                                                                                                                                                                                                                                                                                                                                                                                                                                                                                                                                                                                                                                                                                                                                                                                                                                                                                                                                                                                                                                                                                                                                                                                                                                                                                                                                                                                                                                                                                                                                                                                                                                                                                                                                                                                                                                                                                                                                                                                                                                                                                                                                                                                                                                                                                                                                                                                                                                                                                                                                                                                                                                                                                                                                                                                                                                                                                                                                                                                                                                                                                                                    |   |   |                     |                     |          |   |   |   |  |  |  |   |    |          |   |   |   |   |    |          |   |   |   |                     |        |     |   |   |   |                     |        |    |   |   |   |                     |        |     |   |   |   |                     |        |    |   |   |   |                     |        |    |   |   |   |                     |        |   |   |   |   |                     |        |    |   |   |   |                     |        |    |   |   |   |                     |        |    |   |   |   |                     |        |   |   |   |  |                     |        |    |   |   |   |                     |        |    |   |   |   |                     |        |    |   |   |   |                     |        |   |   |   |   |                     |        |     |   |   |   |                     |        |   |   |   |   |                     |        |   |   |   |   |                     |        |   |   |   |   |                     |        |    |   |   |   |                     |        |   |   |   |   |                     |        |   |   |   |   |                     |        |   |   |   |   |                     |        |    |   |   |   |                     |        |   |   |   |   |                     |        |   |   |   |   |                     |        |   |   |   |   |                     |        |    |   |   |   |                     |                     |   |   |   |   |                     |        |    |   |   |   |                     |                     |   |   |   |   |                     |        |    |   |   |   |                     |                     |   |   |   |   |                     |        |    |   |   |   |                     |                     |   |   |   |   |                     |        |   |   |   |   |                     |                     |   |   |   |   |                     |        |    |   |   |   |                     |                     |    |   |   |   |                     |        |    |   |   |   |                     |                     |   |   |   |   |                     |        |    |   |   |   |                     |                     |   |   |   |   |                     |        |    |   |   |   |                     |                     |   |   |   |   |                     |        |   |   |   |   |                     |                     |   |   |   |   |                     |        |    |   |   |   |                     |                     |   |   |   |   |                     |        |   |   |   |   |                     |                     |   |   |   |   |                     |        |    |   |   |   |                     |                     |   |   |   |   |                     |        |   |   |   |   |                     |                     |   |   |   |   |                     |        |   |   |   |   |                     |                     |   |   |   |   |
| <b>S.G.:</b> P3221 (154)                                                                               |        |                                                                             | <b>Volume [CD] =</b> 133.38                                                                                                                                                                                                                                                                                                                                                                                                                                                                                                                                                                                                                                                                                                                                                                                                                                                                                                                                                                                                                                                                                                                                                                                                                                                                                                                                                                                                                                                                                                                                                                                                                                                                                                                                                                                                                                                                                                                                                                                                                                                                                                                                                                                                                                                                                                                                                                                                                                                                                                                                                                                                                                                                                                                                                                                                                                                                                                                                                                                                                                                                                                                                                                                                                                                                                                                                                                                                                                                                                                                                                                                                                                                                                                                                                                                                                                                                                                                                                                                                                                                                                                                                                                                                                                                                                                                                                                                                                                                                                                                                                                                                                                                                                                                                                                                                                                                                                                                                                                                                                                                                                                                                                                                                                                                                                                                                                                                                   |   |   |                     |                     |          |   |   |   |  |  |  |   |    |          |   |   |   |   |    |          |   |   |   |                     |        |     |   |   |   |                     |        |    |   |   |   |                     |        |     |   |   |   |                     |        |    |   |   |   |                     |        |    |   |   |   |                     |        |   |   |   |   |                     |        |    |   |   |   |                     |        |    |   |   |   |                     |        |    |   |   |   |                     |        |   |   |   |  |                     |        |    |   |   |   |                     |        |    |   |   |   |                     |        |    |   |   |   |                     |        |   |   |   |   |                     |        |     |   |   |   |                     |        |   |   |   |   |                     |        |   |   |   |   |                     |        |   |   |   |   |                     |        |    |   |   |   |                     |        |   |   |   |   |                     |        |   |   |   |   |                     |        |   |   |   |   |                     |        |    |   |   |   |                     |        |   |   |   |   |                     |        |   |   |   |   |                     |        |   |   |   |   |                     |        |    |   |   |   |                     |                     |   |   |   |   |                     |        |    |   |   |   |                     |                     |   |   |   |   |                     |        |    |   |   |   |                     |                     |   |   |   |   |                     |        |    |   |   |   |                     |                     |   |   |   |   |                     |        |   |   |   |   |                     |                     |   |   |   |   |                     |        |    |   |   |   |                     |                     |    |   |   |   |                     |        |    |   |   |   |                     |                     |   |   |   |   |                     |        |    |   |   |   |                     |                     |   |   |   |   |                     |        |    |   |   |   |                     |                     |   |   |   |   |                     |        |   |   |   |   |                     |                     |   |   |   |   |                     |        |    |   |   |   |                     |                     |   |   |   |   |                     |        |   |   |   |   |                     |                     |   |   |   |   |                     |        |    |   |   |   |                     |                     |   |   |   |   |                     |        |   |   |   |   |                     |                     |   |   |   |   |                     |        |   |   |   |   |                     |                     |   |   |   |   |
|                                                                                                        |        |                                                                             | <b>Dx =</b> 2.24                                                                                                                                                                                                                                                                                                                                                                                                                                                                                                                                                                                                                                                                                                                                                                                                                                                                                                                                                                                                                                                                                                                                                                                                                                                                                                                                                                                                                                                                                                                                                                                                                                                                                                                                                                                                                                                                                                                                                                                                                                                                                                                                                                                                                                                                                                                                                                                                                                                                                                                                                                                                                                                                                                                                                                                                                                                                                                                                                                                                                                                                                                                                                                                                                                                                                                                                                                                                                                                                                                                                                                                                                                                                                                                                                                                                                                                                                                                                                                                                                                                                                                                                                                                                                                                                                                                                                                                                                                                                                                                                                                                                                                                                                                                                                                                                                                                                                                                                                                                                                                                                                                                                                                                                                                                                                                                                                                                                              |   |   |                     |                     |          |   |   |   |  |  |  |   |    |          |   |   |   |   |    |          |   |   |   |                     |        |     |   |   |   |                     |        |    |   |   |   |                     |        |     |   |   |   |                     |        |    |   |   |   |                     |        |    |   |   |   |                     |        |   |   |   |   |                     |        |    |   |   |   |                     |        |    |   |   |   |                     |        |    |   |   |   |                     |        |   |   |   |  |                     |        |    |   |   |   |                     |        |    |   |   |   |                     |        |    |   |   |   |                     |        |   |   |   |   |                     |        |     |   |   |   |                     |        |   |   |   |   |                     |        |   |   |   |   |                     |        |   |   |   |   |                     |        |    |   |   |   |                     |        |   |   |   |   |                     |        |   |   |   |   |                     |        |   |   |   |   |                     |        |    |   |   |   |                     |        |   |   |   |   |                     |        |   |   |   |   |                     |        |   |   |   |   |                     |        |    |   |   |   |                     |                     |   |   |   |   |                     |        |    |   |   |   |                     |                     |   |   |   |   |                     |        |    |   |   |   |                     |                     |   |   |   |   |                     |        |    |   |   |   |                     |                     |   |   |   |   |                     |        |   |   |   |   |                     |                     |   |   |   |   |                     |        |    |   |   |   |                     |                     |    |   |   |   |                     |        |    |   |   |   |                     |                     |   |   |   |   |                     |        |    |   |   |   |                     |                     |   |   |   |   |                     |        |    |   |   |   |                     |                     |   |   |   |   |                     |        |   |   |   |   |                     |                     |   |   |   |   |                     |        |    |   |   |   |                     |                     |   |   |   |   |                     |        |   |   |   |   |                     |                     |   |   |   |   |                     |        |    |   |   |   |                     |                     |   |   |   |   |                     |        |   |   |   |   |                     |                     |   |   |   |   |                     |        |   |   |   |   |                     |                     |   |   |   |   |
|                                                                                                        |        |                                                                             | <b>Dm =</b>                                                                                                                                                                                                                                                                                                                                                                                                                                                                                                                                                                                                                                                                                                                                                                                                                                                                                                                                                                                                                                                                                                                                                                                                                                                                                                                                                                                                                                                                                                                                                                                                                                                                                                                                                                                                                                                                                                                                                                                                                                                                                                                                                                                                                                                                                                                                                                                                                                                                                                                                                                                                                                                                                                                                                                                                                                                                                                                                                                                                                                                                                                                                                                                                                                                                                                                                                                                                                                                                                                                                                                                                                                                                                                                                                                                                                                                                                                                                                                                                                                                                                                                                                                                                                                                                                                                                                                                                                                                                                                                                                                                                                                                                                                                                                                                                                                                                                                                                                                                                                                                                                                                                                                                                                                                                                                                                                                                                                   |   |   |                     |                     |          |   |   |   |  |  |  |   |    |          |   |   |   |   |    |          |   |   |   |                     |        |     |   |   |   |                     |        |    |   |   |   |                     |        |     |   |   |   |                     |        |    |   |   |   |                     |        |    |   |   |   |                     |        |   |   |   |   |                     |        |    |   |   |   |                     |        |    |   |   |   |                     |        |    |   |   |   |                     |        |   |   |   |  |                     |        |    |   |   |   |                     |        |    |   |   |   |                     |        |    |   |   |   |                     |        |   |   |   |   |                     |        |     |   |   |   |                     |        |   |   |   |   |                     |        |   |   |   |   |                     |        |   |   |   |   |                     |        |    |   |   |   |                     |        |   |   |   |   |                     |        |   |   |   |   |                     |        |   |   |   |   |                     |        |    |   |   |   |                     |        |   |   |   |   |                     |        |   |   |   |   |                     |        |   |   |   |   |                     |        |    |   |   |   |                     |                     |   |   |   |   |                     |        |    |   |   |   |                     |                     |   |   |   |   |                     |        |    |   |   |   |                     |                     |   |   |   |   |                     |        |    |   |   |   |                     |                     |   |   |   |   |                     |        |   |   |   |   |                     |                     |   |   |   |   |                     |        |    |   |   |   |                     |                     |    |   |   |   |                     |        |    |   |   |   |                     |                     |   |   |   |   |                     |        |    |   |   |   |                     |                     |   |   |   |   |                     |        |    |   |   |   |                     |                     |   |   |   |   |                     |        |   |   |   |   |                     |                     |   |   |   |   |                     |        |    |   |   |   |                     |                     |   |   |   |   |                     |        |   |   |   |   |                     |                     |   |   |   |   |                     |        |    |   |   |   |                     |                     |   |   |   |   |                     |        |   |   |   |   |                     |                     |   |   |   |   |                     |        |   |   |   |   |                     |                     |   |   |   |   |
|                                                                                                        |        |                                                                             | <b>I/Icor =</b> 2.880                                                                                                                                                                                                                                                                                                                                                                                                                                                                                                                                                                                                                                                                                                                                                                                                                                                                                                                                                                                                                                                                                                                                                                                                                                                                                                                                                                                                                                                                                                                                                                                                                                                                                                                                                                                                                                                                                                                                                                                                                                                                                                                                                                                                                                                                                                                                                                                                                                                                                                                                                                                                                                                                                                                                                                                                                                                                                                                                                                                                                                                                                                                                                                                                                                                                                                                                                                                                                                                                                                                                                                                                                                                                                                                                                                                                                                                                                                                                                                                                                                                                                                                                                                                                                                                                                                                                                                                                                                                                                                                                                                                                                                                                                                                                                                                                                                                                                                                                                                                                                                                                                                                                                                                                                                                                                                                                                                                                         |   |   |                     |                     |          |   |   |   |  |  |  |   |    |          |   |   |   |   |    |          |   |   |   |                     |        |     |   |   |   |                     |        |    |   |   |   |                     |        |     |   |   |   |                     |        |    |   |   |   |                     |        |    |   |   |   |                     |        |   |   |   |   |                     |        |    |   |   |   |                     |        |    |   |   |   |                     |        |    |   |   |   |                     |        |   |   |   |  |                     |        |    |   |   |   |                     |        |    |   |   |   |                     |        |    |   |   |   |                     |        |   |   |   |   |                     |        |     |   |   |   |                     |        |   |   |   |   |                     |        |   |   |   |   |                     |        |   |   |   |   |                     |        |    |   |   |   |                     |        |   |   |   |   |                     |        |   |   |   |   |                     |        |   |   |   |   |                     |        |    |   |   |   |                     |        |   |   |   |   |                     |        |   |   |   |   |                     |        |   |   |   |   |                     |        |    |   |   |   |                     |                     |   |   |   |   |                     |        |    |   |   |   |                     |                     |   |   |   |   |                     |        |    |   |   |   |                     |                     |   |   |   |   |                     |        |    |   |   |   |                     |                     |   |   |   |   |                     |        |   |   |   |   |                     |                     |   |   |   |   |                     |        |    |   |   |   |                     |                     |    |   |   |   |                     |        |    |   |   |   |                     |                     |   |   |   |   |                     |        |    |   |   |   |                     |                     |   |   |   |   |                     |        |    |   |   |   |                     |                     |   |   |   |   |                     |        |   |   |   |   |                     |                     |   |   |   |   |                     |        |    |   |   |   |                     |                     |   |   |   |   |                     |        |   |   |   |   |                     |                     |   |   |   |   |                     |        |    |   |   |   |                     |                     |   |   |   |   |                     |        |   |   |   |   |                     |                     |   |   |   |   |                     |        |   |   |   |   |                     |                     |   |   |   |   |
| <b>a =</b> 5.15390                                                                                     |        | <b>alpha =</b><br><b>beta =</b><br><b>gamma</b><br><b>=</b><br><b>Z =</b> 3 |                                                                                                                                                                                                                                                                                                                                                                                                                                                                                                                                                                                                                                                                                                                                                                                                                                                                                                                                                                                                                                                                                                                                                                                                                                                                                                                                                                                                                                                                                                                                                                                                                                                                                                                                                                                                                                                                                                                                                                                                                                                                                                                                                                                                                                                                                                                                                                                                                                                                                                                                                                                                                                                                                                                                                                                                                                                                                                                                                                                                                                                                                                                                                                                                                                                                                                                                                                                                                                                                                                                                                                                                                                                                                                                                                                                                                                                                                                                                                                                                                                                                                                                                                                                                                                                                                                                                                                                                                                                                                                                                                                                                                                                                                                                                                                                                                                                                                                                                                                                                                                                                                                                                                                                                                                                                                                                                                                                                                               |   |   |                     |                     |          |   |   |   |  |  |  |   |    |          |   |   |   |   |    |          |   |   |   |                     |        |     |   |   |   |                     |        |    |   |   |   |                     |        |     |   |   |   |                     |        |    |   |   |   |                     |        |    |   |   |   |                     |        |   |   |   |   |                     |        |    |   |   |   |                     |        |    |   |   |   |                     |        |    |   |   |   |                     |        |   |   |   |  |                     |        |    |   |   |   |                     |        |    |   |   |   |                     |        |    |   |   |   |                     |        |   |   |   |   |                     |        |     |   |   |   |                     |        |   |   |   |   |                     |        |   |   |   |   |                     |        |   |   |   |   |                     |        |    |   |   |   |                     |        |   |   |   |   |                     |        |   |   |   |   |                     |        |   |   |   |   |                     |        |    |   |   |   |                     |        |   |   |   |   |                     |        |   |   |   |   |                     |        |   |   |   |   |                     |        |    |   |   |   |                     |                     |   |   |   |   |                     |        |    |   |   |   |                     |                     |   |   |   |   |                     |        |    |   |   |   |                     |                     |   |   |   |   |                     |        |    |   |   |   |                     |                     |   |   |   |   |                     |        |   |   |   |   |                     |                     |   |   |   |   |                     |        |    |   |   |   |                     |                     |    |   |   |   |                     |        |    |   |   |   |                     |                     |   |   |   |   |                     |        |    |   |   |   |                     |                     |   |   |   |   |                     |        |    |   |   |   |                     |                     |   |   |   |   |                     |        |   |   |   |   |                     |                     |   |   |   |   |                     |        |    |   |   |   |                     |                     |   |   |   |   |                     |        |   |   |   |   |                     |                     |   |   |   |   |                     |        |    |   |   |   |                     |                     |   |   |   |   |                     |        |   |   |   |   |                     |                     |   |   |   |   |                     |        |   |   |   |   |                     |                     |   |   |   |   |
| <b>b =</b>                                                                                             |        |                                                                             |                                                                                                                                                                                                                                                                                                                                                                                                                                                                                                                                                                                                                                                                                                                                                                                                                                                                                                                                                                                                                                                                                                                                                                                                                                                                                                                                                                                                                                                                                                                                                                                                                                                                                                                                                                                                                                                                                                                                                                                                                                                                                                                                                                                                                                                                                                                                                                                                                                                                                                                                                                                                                                                                                                                                                                                                                                                                                                                                                                                                                                                                                                                                                                                                                                                                                                                                                                                                                                                                                                                                                                                                                                                                                                                                                                                                                                                                                                                                                                                                                                                                                                                                                                                                                                                                                                                                                                                                                                                                                                                                                                                                                                                                                                                                                                                                                                                                                                                                                                                                                                                                                                                                                                                                                                                                                                                                                                                                                               |   |   |                     |                     |          |   |   |   |  |  |  |   |    |          |   |   |   |   |    |          |   |   |   |                     |        |     |   |   |   |                     |        |    |   |   |   |                     |        |     |   |   |   |                     |        |    |   |   |   |                     |        |    |   |   |   |                     |        |   |   |   |   |                     |        |    |   |   |   |                     |        |    |   |   |   |                     |        |    |   |   |   |                     |        |   |   |   |  |                     |        |    |   |   |   |                     |        |    |   |   |   |                     |        |    |   |   |   |                     |        |   |   |   |   |                     |        |     |   |   |   |                     |        |   |   |   |   |                     |        |   |   |   |   |                     |        |   |   |   |   |                     |        |    |   |   |   |                     |        |   |   |   |   |                     |        |   |   |   |   |                     |        |   |   |   |   |                     |        |    |   |   |   |                     |        |   |   |   |   |                     |        |   |   |   |   |                     |        |   |   |   |   |                     |        |    |   |   |   |                     |                     |   |   |   |   |                     |        |    |   |   |   |                     |                     |   |   |   |   |                     |        |    |   |   |   |                     |                     |   |   |   |   |                     |        |    |   |   |   |                     |                     |   |   |   |   |                     |        |   |   |   |   |                     |                     |   |   |   |   |                     |        |    |   |   |   |                     |                     |    |   |   |   |                     |        |    |   |   |   |                     |                     |   |   |   |   |                     |        |    |   |   |   |                     |                     |   |   |   |   |                     |        |    |   |   |   |                     |                     |   |   |   |   |                     |        |   |   |   |   |                     |                     |   |   |   |   |                     |        |    |   |   |   |                     |                     |   |   |   |   |                     |        |   |   |   |   |                     |                     |   |   |   |   |                     |        |    |   |   |   |                     |                     |   |   |   |   |                     |        |   |   |   |   |                     |                     |   |   |   |   |                     |        |   |   |   |   |                     |                     |   |   |   |   |
| <b>c =</b> 5.79810                                                                                     |        |                                                                             |                                                                                                                                                                                                                                                                                                                                                                                                                                                                                                                                                                                                                                                                                                                                                                                                                                                                                                                                                                                                                                                                                                                                                                                                                                                                                                                                                                                                                                                                                                                                                                                                                                                                                                                                                                                                                                                                                                                                                                                                                                                                                                                                                                                                                                                                                                                                                                                                                                                                                                                                                                                                                                                                                                                                                                                                                                                                                                                                                                                                                                                                                                                                                                                                                                                                                                                                                                                                                                                                                                                                                                                                                                                                                                                                                                                                                                                                                                                                                                                                                                                                                                                                                                                                                                                                                                                                                                                                                                                                                                                                                                                                                                                                                                                                                                                                                                                                                                                                                                                                                                                                                                                                                                                                                                                                                                                                                                                                                               |   |   |                     |                     |          |   |   |   |  |  |  |   |    |          |   |   |   |   |    |          |   |   |   |                     |        |     |   |   |   |                     |        |    |   |   |   |                     |        |     |   |   |   |                     |        |    |   |   |   |                     |        |    |   |   |   |                     |        |   |   |   |   |                     |        |    |   |   |   |                     |        |    |   |   |   |                     |        |    |   |   |   |                     |        |   |   |   |  |                     |        |    |   |   |   |                     |        |    |   |   |   |                     |        |    |   |   |   |                     |        |   |   |   |   |                     |        |     |   |   |   |                     |        |   |   |   |   |                     |        |   |   |   |   |                     |        |   |   |   |   |                     |        |    |   |   |   |                     |        |   |   |   |   |                     |        |   |   |   |   |                     |        |   |   |   |   |                     |        |    |   |   |   |                     |        |   |   |   |   |                     |        |   |   |   |   |                     |        |   |   |   |   |                     |        |    |   |   |   |                     |                     |   |   |   |   |                     |        |    |   |   |   |                     |                     |   |   |   |   |                     |        |    |   |   |   |                     |                     |   |   |   |   |                     |        |    |   |   |   |                     |                     |   |   |   |   |                     |        |   |   |   |   |                     |                     |   |   |   |   |                     |        |    |   |   |   |                     |                     |    |   |   |   |                     |        |    |   |   |   |                     |                     |   |   |   |   |                     |        |    |   |   |   |                     |                     |   |   |   |   |                     |        |    |   |   |   |                     |                     |   |   |   |   |                     |        |   |   |   |   |                     |                     |   |   |   |   |                     |        |    |   |   |   |                     |                     |   |   |   |   |                     |        |   |   |   |   |                     |                     |   |   |   |   |                     |        |    |   |   |   |                     |                     |   |   |   |   |                     |        |   |   |   |   |                     |                     |   |   |   |   |                     |        |   |   |   |   |                     |                     |   |   |   |   |
| <b>a/b</b><br>= 1.00000                                                                                |        |                                                                             |                                                                                                                                                                                                                                                                                                                                                                                                                                                                                                                                                                                                                                                                                                                                                                                                                                                                                                                                                                                                                                                                                                                                                                                                                                                                                                                                                                                                                                                                                                                                                                                                                                                                                                                                                                                                                                                                                                                                                                                                                                                                                                                                                                                                                                                                                                                                                                                                                                                                                                                                                                                                                                                                                                                                                                                                                                                                                                                                                                                                                                                                                                                                                                                                                                                                                                                                                                                                                                                                                                                                                                                                                                                                                                                                                                                                                                                                                                                                                                                                                                                                                                                                                                                                                                                                                                                                                                                                                                                                                                                                                                                                                                                                                                                                                                                                                                                                                                                                                                                                                                                                                                                                                                                                                                                                                                                                                                                                                               |   |   |                     |                     |          |   |   |   |  |  |  |   |    |          |   |   |   |   |    |          |   |   |   |                     |        |     |   |   |   |                     |        |    |   |   |   |                     |        |     |   |   |   |                     |        |    |   |   |   |                     |        |    |   |   |   |                     |        |   |   |   |   |                     |        |    |   |   |   |                     |        |    |   |   |   |                     |        |    |   |   |   |                     |        |   |   |   |  |                     |        |    |   |   |   |                     |        |    |   |   |   |                     |        |    |   |   |   |                     |        |   |   |   |   |                     |        |     |   |   |   |                     |        |   |   |   |   |                     |        |   |   |   |   |                     |        |   |   |   |   |                     |        |    |   |   |   |                     |        |   |   |   |   |                     |        |   |   |   |   |                     |        |   |   |   |   |                     |        |    |   |   |   |                     |        |   |   |   |   |                     |        |   |   |   |   |                     |        |   |   |   |   |                     |        |    |   |   |   |                     |                     |   |   |   |   |                     |        |    |   |   |   |                     |                     |   |   |   |   |                     |        |    |   |   |   |                     |                     |   |   |   |   |                     |        |    |   |   |   |                     |                     |   |   |   |   |                     |        |   |   |   |   |                     |                     |   |   |   |   |                     |        |    |   |   |   |                     |                     |    |   |   |   |                     |        |    |   |   |   |                     |                     |   |   |   |   |                     |        |    |   |   |   |                     |                     |   |   |   |   |                     |        |    |   |   |   |                     |                     |   |   |   |   |                     |        |   |   |   |   |                     |                     |   |   |   |   |                     |        |    |   |   |   |                     |                     |   |   |   |   |                     |        |   |   |   |   |                     |                     |   |   |   |   |                     |        |    |   |   |   |                     |                     |   |   |   |   |                     |        |   |   |   |   |                     |                     |   |   |   |   |                     |        |   |   |   |   |                     |                     |   |   |   |   |
| <b>c/b</b><br>= 1.12499                                                                                |        |                                                                             |                                                                                                                                                                                                                                                                                                                                                                                                                                                                                                                                                                                                                                                                                                                                                                                                                                                                                                                                                                                                                                                                                                                                                                                                                                                                                                                                                                                                                                                                                                                                                                                                                                                                                                                                                                                                                                                                                                                                                                                                                                                                                                                                                                                                                                                                                                                                                                                                                                                                                                                                                                                                                                                                                                                                                                                                                                                                                                                                                                                                                                                                                                                                                                                                                                                                                                                                                                                                                                                                                                                                                                                                                                                                                                                                                                                                                                                                                                                                                                                                                                                                                                                                                                                                                                                                                                                                                                                                                                                                                                                                                                                                                                                                                                                                                                                                                                                                                                                                                                                                                                                                                                                                                                                                                                                                                                                                                                                                                               |   |   |                     |                     |          |   |   |   |  |  |  |   |    |          |   |   |   |   |    |          |   |   |   |                     |        |     |   |   |   |                     |        |    |   |   |   |                     |        |     |   |   |   |                     |        |    |   |   |   |                     |        |    |   |   |   |                     |        |   |   |   |   |                     |        |    |   |   |   |                     |        |    |   |   |   |                     |        |    |   |   |   |                     |        |   |   |   |  |                     |        |    |   |   |   |                     |        |    |   |   |   |                     |        |    |   |   |   |                     |        |   |   |   |   |                     |        |     |   |   |   |                     |        |   |   |   |   |                     |        |   |   |   |   |                     |        |   |   |   |   |                     |        |    |   |   |   |                     |        |   |   |   |   |                     |        |   |   |   |   |                     |        |   |   |   |   |                     |        |    |   |   |   |                     |        |   |   |   |   |                     |        |   |   |   |   |                     |        |   |   |   |   |                     |        |    |   |   |   |                     |                     |   |   |   |   |                     |        |    |   |   |   |                     |                     |   |   |   |   |                     |        |    |   |   |   |                     |                     |   |   |   |   |                     |        |    |   |   |   |                     |                     |   |   |   |   |                     |        |   |   |   |   |                     |                     |   |   |   |   |                     |        |    |   |   |   |                     |                     |    |   |   |   |                     |        |    |   |   |   |                     |                     |   |   |   |   |                     |        |    |   |   |   |                     |                     |   |   |   |   |                     |        |    |   |   |   |                     |                     |   |   |   |   |                     |        |   |   |   |   |                     |                     |   |   |   |   |                     |        |    |   |   |   |                     |                     |   |   |   |   |                     |        |   |   |   |   |                     |                     |   |   |   |   |                     |        |    |   |   |   |                     |                     |   |   |   |   |                     |        |   |   |   |   |                     |                     |   |   |   |   |                     |        |   |   |   |   |                     |                     |   |   |   |   |
| <b>ANX:</b> AX2                                                                                        |        |                                                                             |                                                                                                                                                                                                                                                                                                                                                                                                                                                                                                                                                                                                                                                                                                                                                                                                                                                                                                                                                                                                                                                                                                                                                                                                                                                                                                                                                                                                                                                                                                                                                                                                                                                                                                                                                                                                                                                                                                                                                                                                                                                                                                                                                                                                                                                                                                                                                                                                                                                                                                                                                                                                                                                                                                                                                                                                                                                                                                                                                                                                                                                                                                                                                                                                                                                                                                                                                                                                                                                                                                                                                                                                                                                                                                                                                                                                                                                                                                                                                                                                                                                                                                                                                                                                                                                                                                                                                                                                                                                                                                                                                                                                                                                                                                                                                                                                                                                                                                                                                                                                                                                                                                                                                                                                                                                                                                                                                                                                                               |   |   |                     |                     |          |   |   |   |  |  |  |   |    |          |   |   |   |   |    |          |   |   |   |                     |        |     |   |   |   |                     |        |    |   |   |   |                     |        |     |   |   |   |                     |        |    |   |   |   |                     |        |    |   |   |   |                     |        |   |   |   |   |                     |        |    |   |   |   |                     |        |    |   |   |   |                     |        |    |   |   |   |                     |        |   |   |   |  |                     |        |    |   |   |   |                     |        |    |   |   |   |                     |        |    |   |   |   |                     |        |   |   |   |   |                     |        |     |   |   |   |                     |        |   |   |   |   |                     |        |   |   |   |   |                     |        |   |   |   |   |                     |        |    |   |   |   |                     |        |   |   |   |   |                     |        |   |   |   |   |                     |        |   |   |   |   |                     |        |    |   |   |   |                     |        |   |   |   |   |                     |        |   |   |   |   |                     |        |   |   |   |   |                     |        |    |   |   |   |                     |                     |   |   |   |   |                     |        |    |   |   |   |                     |                     |   |   |   |   |                     |        |    |   |   |   |                     |                     |   |   |   |   |                     |        |    |   |   |   |                     |                     |   |   |   |   |                     |        |   |   |   |   |                     |                     |   |   |   |   |                     |        |    |   |   |   |                     |                     |    |   |   |   |                     |        |    |   |   |   |                     |                     |   |   |   |   |                     |        |    |   |   |   |                     |                     |   |   |   |   |                     |        |    |   |   |   |                     |                     |   |   |   |   |                     |        |   |   |   |   |                     |                     |   |   |   |   |                     |        |    |   |   |   |                     |                     |   |   |   |   |                     |        |   |   |   |   |                     |                     |   |   |   |   |                     |        |    |   |   |   |                     |                     |   |   |   |   |                     |        |   |   |   |   |                     |                     |   |   |   |   |                     |        |   |   |   |   |                     |                     |   |   |   |   |
| <b>Analysis:</b> O2 Si1                                                                                |        |                                                                             |                                                                                                                                                                                                                                                                                                                                                                                                                                                                                                                                                                                                                                                                                                                                                                                                                                                                                                                                                                                                                                                                                                                                                                                                                                                                                                                                                                                                                                                                                                                                                                                                                                                                                                                                                                                                                                                                                                                                                                                                                                                                                                                                                                                                                                                                                                                                                                                                                                                                                                                                                                                                                                                                                                                                                                                                                                                                                                                                                                                                                                                                                                                                                                                                                                                                                                                                                                                                                                                                                                                                                                                                                                                                                                                                                                                                                                                                                                                                                                                                                                                                                                                                                                                                                                                                                                                                                                                                                                                                                                                                                                                                                                                                                                                                                                                                                                                                                                                                                                                                                                                                                                                                                                                                                                                                                                                                                                                                                               |   |   |                     |                     |          |   |   |   |  |  |  |   |    |          |   |   |   |   |    |          |   |   |   |                     |        |     |   |   |   |                     |        |    |   |   |   |                     |        |     |   |   |   |                     |        |    |   |   |   |                     |        |    |   |   |   |                     |        |   |   |   |   |                     |        |    |   |   |   |                     |        |    |   |   |   |                     |        |    |   |   |   |                     |        |   |   |   |  |                     |        |    |   |   |   |                     |        |    |   |   |   |                     |        |    |   |   |   |                     |        |   |   |   |   |                     |        |     |   |   |   |                     |        |   |   |   |   |                     |        |   |   |   |   |                     |        |   |   |   |   |                     |        |    |   |   |   |                     |        |   |   |   |   |                     |        |   |   |   |   |                     |        |   |   |   |   |                     |        |    |   |   |   |                     |        |   |   |   |   |                     |        |   |   |   |   |                     |        |   |   |   |   |                     |        |    |   |   |   |                     |                     |   |   |   |   |                     |        |    |   |   |   |                     |                     |   |   |   |   |                     |        |    |   |   |   |                     |                     |   |   |   |   |                     |        |    |   |   |   |                     |                     |   |   |   |   |                     |        |   |   |   |   |                     |                     |   |   |   |   |                     |        |    |   |   |   |                     |                     |    |   |   |   |                     |        |    |   |   |   |                     |                     |   |   |   |   |                     |        |    |   |   |   |                     |                     |   |   |   |   |                     |        |    |   |   |   |                     |                     |   |   |   |   |                     |        |   |   |   |   |                     |                     |   |   |   |   |                     |        |    |   |   |   |                     |                     |   |   |   |   |                     |        |   |   |   |   |                     |                     |   |   |   |   |                     |        |    |   |   |   |                     |                     |   |   |   |   |                     |        |   |   |   |   |                     |                     |   |   |   |   |                     |        |   |   |   |   |                     |                     |   |   |   |   |
| Formula from original source: Si O2                                                                    |        |                                                                             |                                                                                                                                                                                                                                                                                                                                                                                                                                                                                                                                                                                                                                                                                                                                                                                                                                                                                                                                                                                                                                                                                                                                                                                                                                                                                                                                                                                                                                                                                                                                                                                                                                                                                                                                                                                                                                                                                                                                                                                                                                                                                                                                                                                                                                                                                                                                                                                                                                                                                                                                                                                                                                                                                                                                                                                                                                                                                                                                                                                                                                                                                                                                                                                                                                                                                                                                                                                                                                                                                                                                                                                                                                                                                                                                                                                                                                                                                                                                                                                                                                                                                                                                                                                                                                                                                                                                                                                                                                                                                                                                                                                                                                                                                                                                                                                                                                                                                                                                                                                                                                                                                                                                                                                                                                                                                                                                                                                                                               |   |   |                     |                     |          |   |   |   |  |  |  |   |    |          |   |   |   |   |    |          |   |   |   |                     |        |     |   |   |   |                     |        |    |   |   |   |                     |        |     |   |   |   |                     |        |    |   |   |   |                     |        |    |   |   |   |                     |        |   |   |   |   |                     |        |    |   |   |   |                     |        |    |   |   |   |                     |        |    |   |   |   |                     |        |   |   |   |  |                     |        |    |   |   |   |                     |        |    |   |   |   |                     |        |    |   |   |   |                     |        |   |   |   |   |                     |        |     |   |   |   |                     |        |   |   |   |   |                     |        |   |   |   |   |                     |        |   |   |   |   |                     |        |    |   |   |   |                     |        |   |   |   |   |                     |        |   |   |   |   |                     |        |   |   |   |   |                     |        |    |   |   |   |                     |        |   |   |   |   |                     |        |   |   |   |   |                     |        |   |   |   |   |                     |        |    |   |   |   |                     |                     |   |   |   |   |                     |        |    |   |   |   |                     |                     |   |   |   |   |                     |        |    |   |   |   |                     |                     |   |   |   |   |                     |        |    |   |   |   |                     |                     |   |   |   |   |                     |        |   |   |   |   |                     |                     |   |   |   |   |                     |        |    |   |   |   |                     |                     |    |   |   |   |                     |        |    |   |   |   |                     |                     |   |   |   |   |                     |        |    |   |   |   |                     |                     |   |   |   |   |                     |        |    |   |   |   |                     |                     |   |   |   |   |                     |        |   |   |   |   |                     |                     |   |   |   |   |                     |        |    |   |   |   |                     |                     |   |   |   |   |                     |        |   |   |   |   |                     |                     |   |   |   |   |                     |        |    |   |   |   |                     |                     |   |   |   |   |                     |        |   |   |   |   |                     |                     |   |   |   |   |                     |        |   |   |   |   |                     |                     |   |   |   |   |
| ICSD Collection Code: 70006                                                                            |        |                                                                             |                                                                                                                                                                                                                                                                                                                                                                                                                                                                                                                                                                                                                                                                                                                                                                                                                                                                                                                                                                                                                                                                                                                                                                                                                                                                                                                                                                                                                                                                                                                                                                                                                                                                                                                                                                                                                                                                                                                                                                                                                                                                                                                                                                                                                                                                                                                                                                                                                                                                                                                                                                                                                                                                                                                                                                                                                                                                                                                                                                                                                                                                                                                                                                                                                                                                                                                                                                                                                                                                                                                                                                                                                                                                                                                                                                                                                                                                                                                                                                                                                                                                                                                                                                                                                                                                                                                                                                                                                                                                                                                                                                                                                                                                                                                                                                                                                                                                                                                                                                                                                                                                                                                                                                                                                                                                                                                                                                                                                               |   |   |                     |                     |          |   |   |   |  |  |  |   |    |          |   |   |   |   |    |          |   |   |   |                     |        |     |   |   |   |                     |        |    |   |   |   |                     |        |     |   |   |   |                     |        |    |   |   |   |                     |        |    |   |   |   |                     |        |   |   |   |   |                     |        |    |   |   |   |                     |        |    |   |   |   |                     |        |    |   |   |   |                     |        |   |   |   |  |                     |        |    |   |   |   |                     |        |    |   |   |   |                     |        |    |   |   |   |                     |        |   |   |   |   |                     |        |     |   |   |   |                     |        |   |   |   |   |                     |        |   |   |   |   |                     |        |   |   |   |   |                     |        |    |   |   |   |                     |        |   |   |   |   |                     |        |   |   |   |   |                     |        |   |   |   |   |                     |        |    |   |   |   |                     |        |   |   |   |   |                     |        |   |   |   |   |                     |        |   |   |   |   |                     |        |    |   |   |   |                     |                     |   |   |   |   |                     |        |    |   |   |   |                     |                     |   |   |   |   |                     |        |    |   |   |   |                     |                     |   |   |   |   |                     |        |    |   |   |   |                     |                     |   |   |   |   |                     |        |   |   |   |   |                     |                     |   |   |   |   |                     |        |    |   |   |   |                     |                     |    |   |   |   |                     |        |    |   |   |   |                     |                     |   |   |   |   |                     |        |    |   |   |   |                     |                     |   |   |   |   |                     |        |    |   |   |   |                     |                     |   |   |   |   |                     |        |   |   |   |   |                     |                     |   |   |   |   |                     |        |    |   |   |   |                     |                     |   |   |   |   |                     |        |   |   |   |   |                     |                     |   |   |   |   |                     |        |    |   |   |   |                     |                     |   |   |   |   |                     |        |   |   |   |   |                     |                     |   |   |   |   |                     |        |   |   |   |   |                     |                     |   |   |   |   |
| Hypothetical Structure: Structure calculated theoretically                                             |        |                                                                             |                                                                                                                                                                                                                                                                                                                                                                                                                                                                                                                                                                                                                                                                                                                                                                                                                                                                                                                                                                                                                                                                                                                                                                                                                                                                                                                                                                                                                                                                                                                                                                                                                                                                                                                                                                                                                                                                                                                                                                                                                                                                                                                                                                                                                                                                                                                                                                                                                                                                                                                                                                                                                                                                                                                                                                                                                                                                                                                                                                                                                                                                                                                                                                                                                                                                                                                                                                                                                                                                                                                                                                                                                                                                                                                                                                                                                                                                                                                                                                                                                                                                                                                                                                                                                                                                                                                                                                                                                                                                                                                                                                                                                                                                                                                                                                                                                                                                                                                                                                                                                                                                                                                                                                                                                                                                                                                                                                                                                               |   |   |                     |                     |          |   |   |   |  |  |  |   |    |          |   |   |   |   |    |          |   |   |   |                     |        |     |   |   |   |                     |        |    |   |   |   |                     |        |     |   |   |   |                     |        |    |   |   |   |                     |        |    |   |   |   |                     |        |   |   |   |   |                     |        |    |   |   |   |                     |        |    |   |   |   |                     |        |    |   |   |   |                     |        |   |   |   |  |                     |        |    |   |   |   |                     |        |    |   |   |   |                     |        |    |   |   |   |                     |        |   |   |   |   |                     |        |     |   |   |   |                     |        |   |   |   |   |                     |        |   |   |   |   |                     |        |   |   |   |   |                     |        |    |   |   |   |                     |        |   |   |   |   |                     |        |   |   |   |   |                     |        |   |   |   |   |                     |        |    |   |   |   |                     |        |   |   |   |   |                     |        |   |   |   |   |                     |        |   |   |   |   |                     |        |    |   |   |   |                     |                     |   |   |   |   |                     |        |    |   |   |   |                     |                     |   |   |   |   |                     |        |    |   |   |   |                     |                     |   |   |   |   |                     |        |    |   |   |   |                     |                     |   |   |   |   |                     |        |   |   |   |   |                     |                     |   |   |   |   |                     |        |    |   |   |   |                     |                     |    |   |   |   |                     |        |    |   |   |   |                     |                     |   |   |   |   |                     |        |    |   |   |   |                     |                     |   |   |   |   |                     |        |    |   |   |   |                     |                     |   |   |   |   |                     |        |   |   |   |   |                     |                     |   |   |   |   |                     |        |    |   |   |   |                     |                     |   |   |   |   |                     |        |   |   |   |   |                     |                     |   |   |   |   |                     |        |    |   |   |   |                     |                     |   |   |   |   |                     |        |   |   |   |   |                     |                     |   |   |   |   |                     |        |   |   |   |   |                     |                     |   |   |   |   |
| Calculated Pattern Original Remarks: Stable up to 846 K, above P6222, above 1143 K tridymite is stable |        |                                                                             |                                                                                                                                                                                                                                                                                                                                                                                                                                                                                                                                                                                                                                                                                                                                                                                                                                                                                                                                                                                                                                                                                                                                                                                                                                                                                                                                                                                                                                                                                                                                                                                                                                                                                                                                                                                                                                                                                                                                                                                                                                                                                                                                                                                                                                                                                                                                                                                                                                                                                                                                                                                                                                                                                                                                                                                                                                                                                                                                                                                                                                                                                                                                                                                                                                                                                                                                                                                                                                                                                                                                                                                                                                                                                                                                                                                                                                                                                                                                                                                                                                                                                                                                                                                                                                                                                                                                                                                                                                                                                                                                                                                                                                                                                                                                                                                                                                                                                                                                                                                                                                                                                                                                                                                                                                                                                                                                                                                                                               |   |   |                     |                     |          |   |   |   |  |  |  |   |    |          |   |   |   |   |    |          |   |   |   |                     |        |     |   |   |   |                     |        |    |   |   |   |                     |        |     |   |   |   |                     |        |    |   |   |   |                     |        |    |   |   |   |                     |        |   |   |   |   |                     |        |    |   |   |   |                     |        |    |   |   |   |                     |        |    |   |   |   |                     |        |   |   |   |  |                     |        |    |   |   |   |                     |        |    |   |   |   |                     |        |    |   |   |   |                     |        |   |   |   |   |                     |        |     |   |   |   |                     |        |   |   |   |   |                     |        |   |   |   |   |                     |        |   |   |   |   |                     |        |    |   |   |   |                     |        |   |   |   |   |                     |        |   |   |   |   |                     |        |   |   |   |   |                     |        |    |   |   |   |                     |        |   |   |   |   |                     |        |   |   |   |   |                     |        |   |   |   |   |                     |        |    |   |   |   |                     |                     |   |   |   |   |                     |        |    |   |   |   |                     |                     |   |   |   |   |                     |        |    |   |   |   |                     |                     |   |   |   |   |                     |        |    |   |   |   |                     |                     |   |   |   |   |                     |        |   |   |   |   |                     |                     |   |   |   |   |                     |        |    |   |   |   |                     |                     |    |   |   |   |                     |        |    |   |   |   |                     |                     |   |   |   |   |                     |        |    |   |   |   |                     |                     |   |   |   |   |                     |        |    |   |   |   |                     |                     |   |   |   |   |                     |        |   |   |   |   |                     |                     |   |   |   |   |                     |        |    |   |   |   |                     |                     |   |   |   |   |                     |        |   |   |   |   |                     |                     |   |   |   |   |                     |        |    |   |   |   |                     |                     |   |   |   |   |                     |        |   |   |   |   |                     |                     |   |   |   |   |                     |        |   |   |   |   |                     |                     |   |   |   |   |
| Minor Warning: No e.s.d reported/abstracted on the cell dimension                                      |        |                                                                             |                                                                                                                                                                                                                                                                                                                                                                                                                                                                                                                                                                                                                                                                                                                                                                                                                                                                                                                                                                                                                                                                                                                                                                                                                                                                                                                                                                                                                                                                                                                                                                                                                                                                                                                                                                                                                                                                                                                                                                                                                                                                                                                                                                                                                                                                                                                                                                                                                                                                                                                                                                                                                                                                                                                                                                                                                                                                                                                                                                                                                                                                                                                                                                                                                                                                                                                                                                                                                                                                                                                                                                                                                                                                                                                                                                                                                                                                                                                                                                                                                                                                                                                                                                                                                                                                                                                                                                                                                                                                                                                                                                                                                                                                                                                                                                                                                                                                                                                                                                                                                                                                                                                                                                                                                                                                                                                                                                                                                               |   |   |                     |                     |          |   |   |   |  |  |  |   |    |          |   |   |   |   |    |          |   |   |   |                     |        |     |   |   |   |                     |        |    |   |   |   |                     |        |     |   |   |   |                     |        |    |   |   |   |                     |        |    |   |   |   |                     |        |   |   |   |   |                     |        |    |   |   |   |                     |        |    |   |   |   |                     |        |    |   |   |   |                     |        |   |   |   |  |                     |        |    |   |   |   |                     |        |    |   |   |   |                     |        |    |   |   |   |                     |        |   |   |   |   |                     |        |     |   |   |   |                     |        |   |   |   |   |                     |        |   |   |   |   |                     |        |   |   |   |   |                     |        |    |   |   |   |                     |        |   |   |   |   |                     |        |   |   |   |   |                     |        |   |   |   |   |                     |        |    |   |   |   |                     |        |   |   |   |   |                     |        |   |   |   |   |                     |        |   |   |   |   |                     |        |    |   |   |   |                     |                     |   |   |   |   |                     |        |    |   |   |   |                     |                     |   |   |   |   |                     |        |    |   |   |   |                     |                     |   |   |   |   |                     |        |    |   |   |   |                     |                     |   |   |   |   |                     |        |   |   |   |   |                     |                     |   |   |   |   |                     |        |    |   |   |   |                     |                     |    |   |   |   |                     |        |    |   |   |   |                     |                     |   |   |   |   |                     |        |    |   |   |   |                     |                     |   |   |   |   |                     |        |    |   |   |   |                     |                     |   |   |   |   |                     |        |   |   |   |   |                     |                     |   |   |   |   |                     |        |    |   |   |   |                     |                     |   |   |   |   |                     |        |   |   |   |   |                     |                     |   |   |   |   |                     |        |    |   |   |   |                     |                     |   |   |   |   |                     |        |   |   |   |   |                     |                     |   |   |   |   |                     |        |   |   |   |   |                     |                     |   |   |   |   |
| Wyckoff Sequence: c a(P3221)                                                                           |        |                                                                             |                                                                                                                                                                                                                                                                                                                                                                                                                                                                                                                                                                                                                                                                                                                                                                                                                                                                                                                                                                                                                                                                                                                                                                                                                                                                                                                                                                                                                                                                                                                                                                                                                                                                                                                                                                                                                                                                                                                                                                                                                                                                                                                                                                                                                                                                                                                                                                                                                                                                                                                                                                                                                                                                                                                                                                                                                                                                                                                                                                                                                                                                                                                                                                                                                                                                                                                                                                                                                                                                                                                                                                                                                                                                                                                                                                                                                                                                                                                                                                                                                                                                                                                                                                                                                                                                                                                                                                                                                                                                                                                                                                                                                                                                                                                                                                                                                                                                                                                                                                                                                                                                                                                                                                                                                                                                                                                                                                                                                               |   |   |                     |                     |          |   |   |   |  |  |  |   |    |          |   |   |   |   |    |          |   |   |   |                     |        |     |   |   |   |                     |        |    |   |   |   |                     |        |     |   |   |   |                     |        |    |   |   |   |                     |        |    |   |   |   |                     |        |   |   |   |   |                     |        |    |   |   |   |                     |        |    |   |   |   |                     |        |    |   |   |   |                     |        |   |   |   |  |                     |        |    |   |   |   |                     |        |    |   |   |   |                     |        |    |   |   |   |                     |        |   |   |   |   |                     |        |     |   |   |   |                     |        |   |   |   |   |                     |        |   |   |   |   |                     |        |   |   |   |   |                     |        |    |   |   |   |                     |        |   |   |   |   |                     |        |   |   |   |   |                     |        |   |   |   |   |                     |        |    |   |   |   |                     |        |   |   |   |   |                     |        |   |   |   |   |                     |        |   |   |   |   |                     |        |    |   |   |   |                     |                     |   |   |   |   |                     |        |    |   |   |   |                     |                     |   |   |   |   |                     |        |    |   |   |   |                     |                     |   |   |   |   |                     |        |    |   |   |   |                     |                     |   |   |   |   |                     |        |   |   |   |   |                     |                     |   |   |   |   |                     |        |    |   |   |   |                     |                     |    |   |   |   |                     |        |    |   |   |   |                     |                     |   |   |   |   |                     |        |    |   |   |   |                     |                     |   |   |   |   |                     |        |    |   |   |   |                     |                     |   |   |   |   |                     |        |   |   |   |   |                     |                     |   |   |   |   |                     |        |    |   |   |   |                     |                     |   |   |   |   |                     |        |   |   |   |   |                     |                     |   |   |   |   |                     |        |    |   |   |   |                     |                     |   |   |   |   |                     |        |   |   |   |   |                     |                     |   |   |   |   |                     |        |   |   |   |   |                     |                     |   |   |   |   |
| Unit Cell Data Source: Single Crystal                                                                  |        |                                                                             |                                                                                                                                                                                                                                                                                                                                                                                                                                                                                                                                                                                                                                                                                                                                                                                                                                                                                                                                                                                                                                                                                                                                                                                                                                                                                                                                                                                                                                                                                                                                                                                                                                                                                                                                                                                                                                                                                                                                                                                                                                                                                                                                                                                                                                                                                                                                                                                                                                                                                                                                                                                                                                                                                                                                                                                                                                                                                                                                                                                                                                                                                                                                                                                                                                                                                                                                                                                                                                                                                                                                                                                                                                                                                                                                                                                                                                                                                                                                                                                                                                                                                                                                                                                                                                                                                                                                                                                                                                                                                                                                                                                                                                                                                                                                                                                                                                                                                                                                                                                                                                                                                                                                                                                                                                                                                                                                                                                                                               |   |   |                     |                     |          |   |   |   |  |  |  |   |    |          |   |   |   |   |    |          |   |   |   |                     |        |     |   |   |   |                     |        |    |   |   |   |                     |        |     |   |   |   |                     |        |    |   |   |   |                     |        |    |   |   |   |                     |        |   |   |   |   |                     |        |    |   |   |   |                     |        |    |   |   |   |                     |        |    |   |   |   |                     |        |   |   |   |  |                     |        |    |   |   |   |                     |        |    |   |   |   |                     |        |    |   |   |   |                     |        |   |   |   |   |                     |        |     |   |   |   |                     |        |   |   |   |   |                     |        |   |   |   |   |                     |        |   |   |   |   |                     |        |    |   |   |   |                     |        |   |   |   |   |                     |        |   |   |   |   |                     |        |   |   |   |   |                     |        |    |   |   |   |                     |        |   |   |   |   |                     |        |   |   |   |   |                     |        |   |   |   |   |                     |        |    |   |   |   |                     |                     |   |   |   |   |                     |        |    |   |   |   |                     |                     |   |   |   |   |                     |        |    |   |   |   |                     |                     |   |   |   |   |                     |        |    |   |   |   |                     |                     |   |   |   |   |                     |        |   |   |   |   |                     |                     |   |   |   |   |                     |        |    |   |   |   |                     |                     |    |   |   |   |                     |        |    |   |   |   |                     |                     |   |   |   |   |                     |        |    |   |   |   |                     |                     |   |   |   |   |                     |        |    |   |   |   |                     |                     |   |   |   |   |                     |        |   |   |   |   |                     |                     |   |   |   |   |                     |        |    |   |   |   |                     |                     |   |   |   |   |                     |        |   |   |   |   |                     |                     |   |   |   |   |                     |        |    |   |   |   |                     |                     |   |   |   |   |                     |        |   |   |   |   |                     |                     |   |   |   |   |                     |        |   |   |   |   |                     |                     |   |   |   |   |
| <b>Structure</b>                                                                                       |        |                                                                             |                                                                                                                                                                                                                                                                                                                                                                                                                                                                                                                                                                                                                                                                                                                                                                                                                                                                                                                                                                                                                                                                                                                                                                                                                                                                                                                                                                                                                                                                                                                                                                                                                                                                                                                                                                                                                                                                                                                                                                                                                                                                                                                                                                                                                                                                                                                                                                                                                                                                                                                                                                                                                                                                                                                                                                                                                                                                                                                                                                                                                                                                                                                                                                                                                                                                                                                                                                                                                                                                                                                                                                                                                                                                                                                                                                                                                                                                                                                                                                                                                                                                                                                                                                                                                                                                                                                                                                                                                                                                                                                                                                                                                                                                                                                                                                                                                                                                                                                                                                                                                                                                                                                                                                                                                                                                                                                                                                                                                               |   |   |                     |                     |          |   |   |   |  |  |  |   |    |          |   |   |   |   |    |          |   |   |   |                     |        |     |   |   |   |                     |        |    |   |   |   |                     |        |     |   |   |   |                     |        |    |   |   |   |                     |        |    |   |   |   |                     |        |   |   |   |   |                     |        |    |   |   |   |                     |        |    |   |   |   |                     |        |    |   |   |   |                     |        |   |   |   |  |                     |        |    |   |   |   |                     |        |    |   |   |   |                     |        |    |   |   |   |                     |        |   |   |   |   |                     |        |     |   |   |   |                     |        |   |   |   |   |                     |        |   |   |   |   |                     |        |   |   |   |   |                     |        |    |   |   |   |                     |        |   |   |   |   |                     |        |   |   |   |   |                     |        |   |   |   |   |                     |        |    |   |   |   |                     |        |   |   |   |   |                     |        |   |   |   |   |                     |        |   |   |   |   |                     |        |    |   |   |   |                     |                     |   |   |   |   |                     |        |    |   |   |   |                     |                     |   |   |   |   |                     |        |    |   |   |   |                     |                     |   |   |   |   |                     |        |    |   |   |   |                     |                     |   |   |   |   |                     |        |   |   |   |   |                     |                     |   |   |   |   |                     |        |    |   |   |   |                     |                     |    |   |   |   |                     |        |    |   |   |   |                     |                     |   |   |   |   |                     |        |    |   |   |   |                     |                     |   |   |   |   |                     |        |    |   |   |   |                     |                     |   |   |   |   |                     |        |   |   |   |   |                     |                     |   |   |   |   |                     |        |    |   |   |   |                     |                     |   |   |   |   |                     |        |   |   |   |   |                     |                     |   |   |   |   |                     |        |    |   |   |   |                     |                     |   |   |   |   |                     |        |   |   |   |   |                     |                     |   |   |   |   |                     |        |   |   |   |   |                     |                     |   |   |   |   |
| Publication: Phys. Rev. B: Condens. Matter. Mater. Phys.                                               |        |                                                                             |                                                                                                                                                                                                                                                                                                                                                                                                                                                                                                                                                                                                                                                                                                                                                                                                                                                                                                                                                                                                                                                                                                                                                                                                                                                                                                                                                                                                                                                                                                                                                                                                                                                                                                                                                                                                                                                                                                                                                                                                                                                                                                                                                                                                                                                                                                                                                                                                                                                                                                                                                                                                                                                                                                                                                                                                                                                                                                                                                                                                                                                                                                                                                                                                                                                                                                                                                                                                                                                                                                                                                                                                                                                                                                                                                                                                                                                                                                                                                                                                                                                                                                                                                                                                                                                                                                                                                                                                                                                                                                                                                                                                                                                                                                                                                                                                                                                                                                                                                                                                                                                                                                                                                                                                                                                                                                                                                                                                                               |   |   |                     |                     |          |   |   |   |  |  |  |   |    |          |   |   |   |   |    |          |   |   |   |                     |        |     |   |   |   |                     |        |    |   |   |   |                     |        |     |   |   |   |                     |        |    |   |   |   |                     |        |    |   |   |   |                     |        |   |   |   |   |                     |        |    |   |   |   |                     |        |    |   |   |   |                     |        |    |   |   |   |                     |        |   |   |   |  |                     |        |    |   |   |   |                     |        |    |   |   |   |                     |        |    |   |   |   |                     |        |   |   |   |   |                     |        |     |   |   |   |                     |        |   |   |   |   |                     |        |   |   |   |   |                     |        |   |   |   |   |                     |        |    |   |   |   |                     |        |   |   |   |   |                     |        |   |   |   |   |                     |        |   |   |   |   |                     |        |    |   |   |   |                     |        |   |   |   |   |                     |        |   |   |   |   |                     |        |   |   |   |   |                     |        |    |   |   |   |                     |                     |   |   |   |   |                     |        |    |   |   |   |                     |                     |   |   |   |   |                     |        |    |   |   |   |                     |                     |   |   |   |   |                     |        |    |   |   |   |                     |                     |   |   |   |   |                     |        |   |   |   |   |                     |                     |   |   |   |   |                     |        |    |   |   |   |                     |                     |    |   |   |   |                     |        |    |   |   |   |                     |                     |   |   |   |   |                     |        |    |   |   |   |                     |                     |   |   |   |   |                     |        |    |   |   |   |                     |                     |   |   |   |   |                     |        |   |   |   |   |                     |                     |   |   |   |   |                     |        |    |   |   |   |                     |                     |   |   |   |   |                     |        |   |   |   |   |                     |                     |   |   |   |   |                     |        |    |   |   |   |                     |                     |   |   |   |   |                     |        |   |   |   |   |                     |                     |   |   |   |   |                     |        |   |   |   |   |                     |                     |   |   |   |   |
| Detail: volume 44, page 489 (1991)                                                                     |        |                                                                             |                                                                                                                                                                                                                                                                                                                                                                                                                                                                                                                                                                                                                                                                                                                                                                                                                                                                                                                                                                                                                                                                                                                                                                                                                                                                                                                                                                                                                                                                                                                                                                                                                                                                                                                                                                                                                                                                                                                                                                                                                                                                                                                                                                                                                                                                                                                                                                                                                                                                                                                                                                                                                                                                                                                                                                                                                                                                                                                                                                                                                                                                                                                                                                                                                                                                                                                                                                                                                                                                                                                                                                                                                                                                                                                                                                                                                                                                                                                                                                                                                                                                                                                                                                                                                                                                                                                                                                                                                                                                                                                                                                                                                                                                                                                                                                                                                                                                                                                                                                                                                                                                                                                                                                                                                                                                                                                                                                                                                               |   |   |                     |                     |          |   |   |   |  |  |  |   |    |          |   |   |   |   |    |          |   |   |   |                     |        |     |   |   |   |                     |        |    |   |   |   |                     |        |     |   |   |   |                     |        |    |   |   |   |                     |        |    |   |   |   |                     |        |   |   |   |   |                     |        |    |   |   |   |                     |        |    |   |   |   |                     |        |    |   |   |   |                     |        |   |   |   |  |                     |        |    |   |   |   |                     |        |    |   |   |   |                     |        |    |   |   |   |                     |        |   |   |   |   |                     |        |     |   |   |   |                     |        |   |   |   |   |                     |        |   |   |   |   |                     |        |   |   |   |   |                     |        |    |   |   |   |                     |        |   |   |   |   |                     |        |   |   |   |   |                     |        |   |   |   |   |                     |        |    |   |   |   |                     |        |   |   |   |   |                     |        |   |   |   |   |                     |        |   |   |   |   |                     |        |    |   |   |   |                     |                     |   |   |   |   |                     |        |    |   |   |   |                     |                     |   |   |   |   |                     |        |    |   |   |   |                     |                     |   |   |   |   |                     |        |    |   |   |   |                     |                     |   |   |   |   |                     |        |   |   |   |   |                     |                     |   |   |   |   |                     |        |    |   |   |   |                     |                     |    |   |   |   |                     |        |    |   |   |   |                     |                     |   |   |   |   |                     |        |    |   |   |   |                     |                     |   |   |   |   |                     |        |    |   |   |   |                     |                     |   |   |   |   |                     |        |   |   |   |   |                     |                     |   |   |   |   |                     |        |    |   |   |   |                     |                     |   |   |   |   |                     |        |   |   |   |   |                     |                     |   |   |   |   |                     |        |    |   |   |   |                     |                     |   |   |   |   |                     |        |   |   |   |   |                     |                     |   |   |   |   |                     |        |   |   |   |   |                     |                     |   |   |   |   |
| Authors: Chelikowsky, J.R., Troullier, N., Martins, J.L., King, Jr., H.E.                              |        |                                                                             |                                                                                                                                                                                                                                                                                                                                                                                                                                                                                                                                                                                                                                                                                                                                                                                                                                                                                                                                                                                                                                                                                                                                                                                                                                                                                                                                                                                                                                                                                                                                                                                                                                                                                                                                                                                                                                                                                                                                                                                                                                                                                                                                                                                                                                                                                                                                                                                                                                                                                                                                                                                                                                                                                                                                                                                                                                                                                                                                                                                                                                                                                                                                                                                                                                                                                                                                                                                                                                                                                                                                                                                                                                                                                                                                                                                                                                                                                                                                                                                                                                                                                                                                                                                                                                                                                                                                                                                                                                                                                                                                                                                                                                                                                                                                                                                                                                                                                                                                                                                                                                                                                                                                                                                                                                                                                                                                                                                                                               |   |   |                     |                     |          |   |   |   |  |  |  |   |    |          |   |   |   |   |    |          |   |   |   |                     |        |     |   |   |   |                     |        |    |   |   |   |                     |        |     |   |   |   |                     |        |    |   |   |   |                     |        |    |   |   |   |                     |        |   |   |   |   |                     |        |    |   |   |   |                     |        |    |   |   |   |                     |        |    |   |   |   |                     |        |   |   |   |  |                     |        |    |   |   |   |                     |        |    |   |   |   |                     |        |    |   |   |   |                     |        |   |   |   |   |                     |        |     |   |   |   |                     |        |   |   |   |   |                     |        |   |   |   |   |                     |        |   |   |   |   |                     |        |    |   |   |   |                     |        |   |   |   |   |                     |        |   |   |   |   |                     |        |   |   |   |   |                     |        |    |   |   |   |                     |        |   |   |   |   |                     |        |   |   |   |   |                     |        |   |   |   |   |                     |        |    |   |   |   |                     |                     |   |   |   |   |                     |        |    |   |   |   |                     |                     |   |   |   |   |                     |        |    |   |   |   |                     |                     |   |   |   |   |                     |        |    |   |   |   |                     |                     |   |   |   |   |                     |        |   |   |   |   |                     |                     |   |   |   |   |                     |        |    |   |   |   |                     |                     |    |   |   |   |                     |        |    |   |   |   |                     |                     |   |   |   |   |                     |        |    |   |   |   |                     |                     |   |   |   |   |                     |        |    |   |   |   |                     |                     |   |   |   |   |                     |        |   |   |   |   |                     |                     |   |   |   |   |                     |        |    |   |   |   |                     |                     |   |   |   |   |                     |        |   |   |   |   |                     |                     |   |   |   |   |                     |        |    |   |   |   |                     |                     |   |   |   |   |                     |        |   |   |   |   |                     |                     |   |   |   |   |                     |        |   |   |   |   |                     |                     |   |   |   |   |
| Primary Reference                                                                                      |        |                                                                             |                                                                                                                                                                                                                                                                                                                                                                                                                                                                                                                                                                                                                                                                                                                                                                                                                                                                                                                                                                                                                                                                                                                                                                                                                                                                                                                                                                                                                                                                                                                                                                                                                                                                                                                                                                                                                                                                                                                                                                                                                                                                                                                                                                                                                                                                                                                                                                                                                                                                                                                                                                                                                                                                                                                                                                                                                                                                                                                                                                                                                                                                                                                                                                                                                                                                                                                                                                                                                                                                                                                                                                                                                                                                                                                                                                                                                                                                                                                                                                                                                                                                                                                                                                                                                                                                                                                                                                                                                                                                                                                                                                                                                                                                                                                                                                                                                                                                                                                                                                                                                                                                                                                                                                                                                                                                                                                                                                                                                               |   |   |                     |                     |          |   |   |   |  |  |  |   |    |          |   |   |   |   |    |          |   |   |   |                     |        |     |   |   |   |                     |        |    |   |   |   |                     |        |     |   |   |   |                     |        |    |   |   |   |                     |        |    |   |   |   |                     |        |   |   |   |   |                     |        |    |   |   |   |                     |        |    |   |   |   |                     |        |    |   |   |   |                     |        |   |   |   |  |                     |        |    |   |   |   |                     |        |    |   |   |   |                     |        |    |   |   |   |                     |        |   |   |   |   |                     |        |     |   |   |   |                     |        |   |   |   |   |                     |        |   |   |   |   |                     |        |   |   |   |   |                     |        |    |   |   |   |                     |        |   |   |   |   |                     |        |   |   |   |   |                     |        |   |   |   |   |                     |        |    |   |   |   |                     |        |   |   |   |   |                     |        |   |   |   |   |                     |        |   |   |   |   |                     |        |    |   |   |   |                     |                     |   |   |   |   |                     |        |    |   |   |   |                     |                     |   |   |   |   |                     |        |    |   |   |   |                     |                     |   |   |   |   |                     |        |    |   |   |   |                     |                     |   |   |   |   |                     |        |   |   |   |   |                     |                     |   |   |   |   |                     |        |    |   |   |   |                     |                     |    |   |   |   |                     |        |    |   |   |   |                     |                     |   |   |   |   |                     |        |    |   |   |   |                     |                     |   |   |   |   |                     |        |    |   |   |   |                     |                     |   |   |   |   |                     |        |   |   |   |   |                     |                     |   |   |   |   |                     |        |    |   |   |   |                     |                     |   |   |   |   |                     |        |   |   |   |   |                     |                     |   |   |   |   |                     |        |    |   |   |   |                     |                     |   |   |   |   |                     |        |   |   |   |   |                     |                     |   |   |   |   |                     |        |   |   |   |   |                     |                     |   |   |   |   |
| Publication: Calculated from ICSD using POWD-12++                                                      |        |                                                                             |                                                                                                                                                                                                                                                                                                                                                                                                                                                                                                                                                                                                                                                                                                                                                                                                                                                                                                                                                                                                                                                                                                                                                                                                                                                                                                                                                                                                                                                                                                                                                                                                                                                                                                                                                                                                                                                                                                                                                                                                                                                                                                                                                                                                                                                                                                                                                                                                                                                                                                                                                                                                                                                                                                                                                                                                                                                                                                                                                                                                                                                                                                                                                                                                                                                                                                                                                                                                                                                                                                                                                                                                                                                                                                                                                                                                                                                                                                                                                                                                                                                                                                                                                                                                                                                                                                                                                                                                                                                                                                                                                                                                                                                                                                                                                                                                                                                                                                                                                                                                                                                                                                                                                                                                                                                                                                                                                                                                                               |   |   |                     |                     |          |   |   |   |  |  |  |   |    |          |   |   |   |   |    |          |   |   |   |                     |        |     |   |   |   |                     |        |    |   |   |   |                     |        |     |   |   |   |                     |        |    |   |   |   |                     |        |    |   |   |   |                     |        |   |   |   |   |                     |        |    |   |   |   |                     |        |    |   |   |   |                     |        |    |   |   |   |                     |        |   |   |   |  |                     |        |    |   |   |   |                     |        |    |   |   |   |                     |        |    |   |   |   |                     |        |   |   |   |   |                     |        |     |   |   |   |                     |        |   |   |   |   |                     |        |   |   |   |   |                     |        |   |   |   |   |                     |        |    |   |   |   |                     |        |   |   |   |   |                     |        |   |   |   |   |                     |        |   |   |   |   |                     |        |    |   |   |   |                     |        |   |   |   |   |                     |        |   |   |   |   |                     |        |   |   |   |   |                     |        |    |   |   |   |                     |                     |   |   |   |   |                     |        |    |   |   |   |                     |                     |   |   |   |   |                     |        |    |   |   |   |                     |                     |   |   |   |   |                     |        |    |   |   |   |                     |                     |   |   |   |   |                     |        |   |   |   |   |                     |                     |   |   |   |   |                     |        |    |   |   |   |                     |                     |    |   |   |   |                     |        |    |   |   |   |                     |                     |   |   |   |   |                     |        |    |   |   |   |                     |                     |   |   |   |   |                     |        |    |   |   |   |                     |                     |   |   |   |   |                     |        |   |   |   |   |                     |                     |   |   |   |   |                     |        |    |   |   |   |                     |                     |   |   |   |   |                     |        |   |   |   |   |                     |                     |   |   |   |   |                     |        |    |   |   |   |                     |                     |   |   |   |   |                     |        |   |   |   |   |                     |                     |   |   |   |   |                     |        |   |   |   |   |                     |                     |   |   |   |   |
| <b>Radiation:</b> CuKα1                                                                                |        |                                                                             | <b>Filter:</b> Not specified                                                                                                                                                                                                                                                                                                                                                                                                                                                                                                                                                                                                                                                                                                                                                                                                                                                                                                                                                                                                                                                                                                                                                                                                                                                                                                                                                                                                                                                                                                                                                                                                                                                                                                                                                                                                                                                                                                                                                                                                                                                                                                                                                                                                                                                                                                                                                                                                                                                                                                                                                                                                                                                                                                                                                                                                                                                                                                                                                                                                                                                                                                                                                                                                                                                                                                                                                                                                                                                                                                                                                                                                                                                                                                                                                                                                                                                                                                                                                                                                                                                                                                                                                                                                                                                                                                                                                                                                                                                                                                                                                                                                                                                                                                                                                                                                                                                                                                                                                                                                                                                                                                                                                                                                                                                                                                                                                                                                  |   |   |                     |                     |          |   |   |   |  |  |  |   |    |          |   |   |   |   |    |          |   |   |   |                     |        |     |   |   |   |                     |        |    |   |   |   |                     |        |     |   |   |   |                     |        |    |   |   |   |                     |        |    |   |   |   |                     |        |   |   |   |   |                     |        |    |   |   |   |                     |        |    |   |   |   |                     |        |    |   |   |   |                     |        |   |   |   |  |                     |        |    |   |   |   |                     |        |    |   |   |   |                     |        |    |   |   |   |                     |        |   |   |   |   |                     |        |     |   |   |   |                     |        |   |   |   |   |                     |        |   |   |   |   |                     |        |   |   |   |   |                     |        |    |   |   |   |                     |        |   |   |   |   |                     |        |   |   |   |   |                     |        |   |   |   |   |                     |        |    |   |   |   |                     |        |   |   |   |   |                     |        |   |   |   |   |                     |        |   |   |   |   |                     |        |    |   |   |   |                     |                     |   |   |   |   |                     |        |    |   |   |   |                     |                     |   |   |   |   |                     |        |    |   |   |   |                     |                     |   |   |   |   |                     |        |    |   |   |   |                     |                     |   |   |   |   |                     |        |   |   |   |   |                     |                     |   |   |   |   |                     |        |    |   |   |   |                     |                     |    |   |   |   |                     |        |    |   |   |   |                     |                     |   |   |   |   |                     |        |    |   |   |   |                     |                     |   |   |   |   |                     |        |    |   |   |   |                     |                     |   |   |   |   |                     |        |   |   |   |   |                     |                     |   |   |   |   |                     |        |    |   |   |   |                     |                     |   |   |   |   |                     |        |   |   |   |   |                     |                     |   |   |   |   |                     |        |    |   |   |   |                     |                     |   |   |   |   |                     |        |   |   |   |   |                     |                     |   |   |   |   |                     |        |   |   |   |   |                     |                     |   |   |   |   |
| <b>Wavelength:</b> 1.54060                                                                             |        |                                                                             | <b>d-spacing:</b>                                                                                                                                                                                                                                                                                                                                                                                                                                                                                                                                                                                                                                                                                                                                                                                                                                                                                                                                                                                                                                                                                                                                                                                                                                                                                                                                                                                                                                                                                                                                                                                                                                                                                                                                                                                                                                                                                                                                                                                                                                                                                                                                                                                                                                                                                                                                                                                                                                                                                                                                                                                                                                                                                                                                                                                                                                                                                                                                                                                                                                                                                                                                                                                                                                                                                                                                                                                                                                                                                                                                                                                                                                                                                                                                                                                                                                                                                                                                                                                                                                                                                                                                                                                                                                                                                                                                                                                                                                                                                                                                                                                                                                                                                                                                                                                                                                                                                                                                                                                                                                                                                                                                                                                                                                                                                                                                                                                                             |   |   |                     |                     |          |   |   |   |  |  |  |   |    |          |   |   |   |   |    |          |   |   |   |                     |        |     |   |   |   |                     |        |    |   |   |   |                     |        |     |   |   |   |                     |        |    |   |   |   |                     |        |    |   |   |   |                     |        |   |   |   |   |                     |        |    |   |   |   |                     |        |    |   |   |   |                     |        |    |   |   |   |                     |        |   |   |   |  |                     |        |    |   |   |   |                     |        |    |   |   |   |                     |        |    |   |   |   |                     |        |   |   |   |   |                     |        |     |   |   |   |                     |        |   |   |   |   |                     |        |   |   |   |   |                     |        |   |   |   |   |                     |        |    |   |   |   |                     |        |   |   |   |   |                     |        |   |   |   |   |                     |        |   |   |   |   |                     |        |    |   |   |   |                     |        |   |   |   |   |                     |        |   |   |   |   |                     |        |   |   |   |   |                     |        |    |   |   |   |                     |                     |   |   |   |   |                     |        |    |   |   |   |                     |                     |   |   |   |   |                     |        |    |   |   |   |                     |                     |   |   |   |   |                     |        |    |   |   |   |                     |                     |   |   |   |   |                     |        |   |   |   |   |                     |                     |   |   |   |   |                     |        |    |   |   |   |                     |                     |    |   |   |   |                     |        |    |   |   |   |                     |                     |   |   |   |   |                     |        |    |   |   |   |                     |                     |   |   |   |   |                     |        |    |   |   |   |                     |                     |   |   |   |   |                     |        |   |   |   |   |                     |                     |   |   |   |   |                     |        |    |   |   |   |                     |                     |   |   |   |   |                     |        |   |   |   |   |                     |                     |   |   |   |   |                     |        |    |   |   |   |                     |                     |   |   |   |   |                     |        |   |   |   |   |                     |                     |   |   |   |   |                     |        |   |   |   |   |                     |                     |   |   |   |   |
| <b>SS/FOM:</b> 999.9 (0,31)                                                                            |        |                                                                             |                                                                                                                                                                                                                                                                                                                                                                                                                                                                                                                                                                                                                                                                                                                                                                                                                                                                                                                                                                                                                                                                                                                                                                                                                                                                                                                                                                                                                                                                                                                                                                                                                                                                                                                                                                                                                                                                                                                                                                                                                                                                                                                                                                                                                                                                                                                                                                                                                                                                                                                                                                                                                                                                                                                                                                                                                                                                                                                                                                                                                                                                                                                                                                                                                                                                                                                                                                                                                                                                                                                                                                                                                                                                                                                                                                                                                                                                                                                                                                                                                                                                                                                                                                                                                                                                                                                                                                                                                                                                                                                                                                                                                                                                                                                                                                                                                                                                                                                                                                                                                                                                                                                                                                                                                                                                                                                                                                                                                               |   |   |                     |                     |          |   |   |   |  |  |  |   |    |          |   |   |   |   |    |          |   |   |   |                     |        |     |   |   |   |                     |        |    |   |   |   |                     |        |     |   |   |   |                     |        |    |   |   |   |                     |        |    |   |   |   |                     |        |   |   |   |   |                     |        |    |   |   |   |                     |        |    |   |   |   |                     |        |    |   |   |   |                     |        |   |   |   |  |                     |        |    |   |   |   |                     |        |    |   |   |   |                     |        |    |   |   |   |                     |        |   |   |   |   |                     |        |     |   |   |   |                     |        |   |   |   |   |                     |        |   |   |   |   |                     |        |   |   |   |   |                     |        |    |   |   |   |                     |        |   |   |   |   |                     |        |   |   |   |   |                     |        |   |   |   |   |                     |        |    |   |   |   |                     |        |   |   |   |   |                     |        |   |   |   |   |                     |        |   |   |   |   |                     |        |    |   |   |   |                     |                     |   |   |   |   |                     |        |    |   |   |   |                     |                     |   |   |   |   |                     |        |    |   |   |   |                     |                     |   |   |   |   |                     |        |    |   |   |   |                     |                     |   |   |   |   |                     |        |   |   |   |   |                     |                     |   |   |   |   |                     |        |    |   |   |   |                     |                     |    |   |   |   |                     |        |    |   |   |   |                     |                     |   |   |   |   |                     |        |    |   |   |   |                     |                     |   |   |   |   |                     |        |    |   |   |   |                     |                     |   |   |   |   |                     |        |   |   |   |   |                     |                     |   |   |   |   |                     |        |    |   |   |   |                     |                     |   |   |   |   |                     |        |   |   |   |   |                     |                     |   |   |   |   |                     |        |    |   |   |   |                     |                     |   |   |   |   |                     |        |   |   |   |   |                     |                     |   |   |   |   |                     |        |   |   |   |   |                     |                     |   |   |   |   |

| d           | 2θ          | l<br>fix | h | k | l |
|-------------|-------------|----------|---|---|---|
| 0.8842<br>1 | 121.19<br>2 | 2        | 0 | 4 | 4 |
| 0.8822<br>9 | 121.63<br>5 | 3        | 0 | 5 | 1 |
| 0.8697<br>9 | 124.65<br>5 | 4        | 1 | 4 | 3 |
| 0.8619<br>4 | 126.67<br>9 | 3        | 2 | 2 | 5 |
| 0.8589<br>8 | 127.47<br>0 | 2        | 3 | 3 | 0 |
| 0.8531<br>5 | 129.08<br>1 | 5        | 0 | 5 | 2 |
| 0.8497<br>1 | 130.06<br>4 | 4        | 3 | 3 | 1 |
| 0.8463<br>1 | 131.06<br>4 | 7        | 3 | 1 | 5 |
| 0.8435<br>0 | 131.90<br>7 | 5        | 4 | 2 | 0 |
| 0.8385<br>2 | 133.45<br>5 | 2        | 1 | 2 | 6 |
| 0.8363<br>4 | 134.15<br>5 | 9        | 2 | 3 | 4 |
| 0.8347<br>2 | 134.68<br>6 | 2        | 2 | 4 | 1 |
| 0.8235<br>9 | 138.55<br>1 | 2        | 3 | 3 | 2 |
| 0.8144<br>0 | 142.11<br>9 | 4        | 0 | 1 | 7 |
| 0.8104<br>1 | 143.79<br>7 | 5        | 0 | 3 | 6 |
| 0.8104<br>1 | 143.79<br>6 | 5        | 5 | 0 | 3 |
| 0.8099<br>2 | 144.01<br>0 | 4        | 2 | 4 | 2 |
| 0.8084<br>4 | 144.66<br>1 | 5        | 1 | 4 | 4 |
| 0.8040<br>5 | 146.67<br>9 | 2        | 0 | 4 | 5 |
| 0.8016<br>5 | 147.84<br>6 | 3        | 5 | 1 | 0 |

Pattern: PDF 01-070-9854 (Tune Cell)    Radiation: 1.54060    Quality:  
User modified

|                                                                                                 |                       |              |                                                                                                                        |  |  |  |  |  |  |  |  |  |  |  |
|-------------------------------------------------------------------------------------------------|-----------------------|--------------|------------------------------------------------------------------------------------------------------------------------|--|--|--|--|--|--|--|--|--|--|--|
| <b>Formula</b> Ca ( C O3 )                                                                      |                       |              |                                                                                                                        |  |  |  |  |  |  |  |  |  |  |  |
| <b>Name</b> Calcium Carbonate                                                                   |                       |              |                                                                                                                        |  |  |  |  |  |  |  |  |  |  |  |
| <b>Name (mineral)</b> Aragonite                                                                 |                       |              |                                                                                                                        |  |  |  |  |  |  |  |  |  |  |  |
| <b>Name (common)</b>                                                                            |                       |              |                                                                                                                        |  |  |  |  |  |  |  |  |  |  |  |
| <b>Lattice:</b> Triclinic                                                                       |                       |              | <b>Mol. weight</b> = 100.09<br><b>Volume [CD]</b> = 226.96<br><b>Dx</b> = 2.93<br><b>Dm</b> =<br><b>I/Icor</b> = 0.330 |  |  |  |  |  |  |  |  |  |  |  |
| <b>S.G.:</b> P-1 (2)                                                                            |                       |              |                                                                                                                        |  |  |  |  |  |  |  |  |  |  |  |
| <b>a</b> = 5.73940                                                                              | <b>alpha</b> = 89.999 |              |                                                                                                                        |  |  |  |  |  |  |  |  |  |  |  |
| <b>b</b> = 4.96160                                                                              | <b>beta</b> = 90.012  |              |                                                                                                                        |  |  |  |  |  |  |  |  |  |  |  |
| <b>c</b> = 7.97000                                                                              | <b>gamma</b> = 89.996 |              |                                                                                                                        |  |  |  |  |  |  |  |  |  |  |  |
| <b>a/b</b> = 1.15676                                                                            |                       | <b>Z</b> = 4 |                                                                                                                        |  |  |  |  |  |  |  |  |  |  |  |
| <b>c/b</b> = 1.60634                                                                            |                       |              |                                                                                                                        |  |  |  |  |  |  |  |  |  |  |  |
| <b>ANX:</b> ABX3                                                                                |                       |              |                                                                                                                        |  |  |  |  |  |  |  |  |  |  |  |
| <b>Analysis:</b> C1 Ca1 O3                                                                      |                       |              |                                                                                                                        |  |  |  |  |  |  |  |  |  |  |  |
| <b>Formula from original source:</b> Ca (C O3)                                                  |                       |              |                                                                                                                        |  |  |  |  |  |  |  |  |  |  |  |
| <b>ICSD Collection Code:</b> 280991                                                             |                       |              |                                                                                                                        |  |  |  |  |  |  |  |  |  |  |  |
| <b>Note:</b> Structure determined on a twinned crystal                                          |                       |              |                                                                                                                        |  |  |  |  |  |  |  |  |  |  |  |
| <b>Sample Source or Locality:</b> Specimen from British Museum, UK                              |                       |              |                                                                                                                        |  |  |  |  |  |  |  |  |  |  |  |
| <b>Wyckoff Sequence:</b> i10(P1-)                                                               |                       |              |                                                                                                                        |  |  |  |  |  |  |  |  |  |  |  |
| <b>Unit Cell Data Source:</b> Single Crystal                                                    |                       |              |                                                                                                                        |  |  |  |  |  |  |  |  |  |  |  |
| <b>Structure</b>                                                                                |                       |              |                                                                                                                        |  |  |  |  |  |  |  |  |  |  |  |
| <b>Publication:</b> Acta Crystallogr., Sec. B: Struct. Sci.                                     |                       |              |                                                                                                                        |  |  |  |  |  |  |  |  |  |  |  |
| <b>Detail:</b> volume 58, page 448 (2002)                                                       |                       |              |                                                                                                                        |  |  |  |  |  |  |  |  |  |  |  |
| <b>Authors:</b> Bevan, D.J.M., Rossmanith, E., Mylrea, D.K., Ness, S.E., Taylor, M.R., Cuff, C. |                       |              |                                                                                                                        |  |  |  |  |  |  |  |  |  |  |  |
| <b>Primary Reference</b>                                                                        |                       |              |                                                                                                                        |  |  |  |  |  |  |  |  |  |  |  |
| <b>Publication:</b> Calculated from ICSD using POWD-12++                                        |                       |              |                                                                                                                        |  |  |  |  |  |  |  |  |  |  |  |
| <b>Radiation:</b> CuKα1                                                                         |                       |              | <b>Filter:</b> Not specified<br><b>d-spacing:</b>                                                                      |  |  |  |  |  |  |  |  |  |  |  |
| <b>Wavelength:</b> 1.54060                                                                      |                       |              |                                                                                                                        |  |  |  |  |  |  |  |  |  |  |  |
| <b>SS/FOM:</b> 148.1 (0.0023,88)                                                                |                       |              |                                                                                                                        |  |  |  |  |  |  |  |  |  |  |  |

| d       | 2θ     | I fix | h  | k  | l | d       | 2θ     | I fix | h  | k  | l |
|---------|--------|-------|----|----|---|---------|--------|-------|----|----|---|
| 7.97000 | 11.093 | 2     | 0  | 0  | 1 | 2.34204 | 38.404 | 278   | 0  | -1 | 3 |
| 5.73940 | 15.426 | 2     | 1  | 0  | 0 | 2.32895 | 38.629 | 194   | -2 | 0  | 2 |
| 4.96160 | 17.863 | 2     | 0  | 1  | 0 | 2.32849 | 38.637 | 194   | 2  | 0  | 2 |
| 4.65698 | 19.042 | 3     | 1  | 0  | 1 | 2.18957 | 41.195 | 128   | 1  | 2  | 1 |
| 4.65791 | 19.038 | 3     | -1 | 0  | 1 | 2.18945 | 41.198 | 128   | 1  | -2 |   |
| 4.21206 | 21.075 | 18    | 0  | -1 | 1 | 2.16829 | 41.618 | 6     | 1  | -1 | 3 |
| 4.21212 | 21.075 | 18    | 0  | 1  | 1 | 2.16836 | 41.617 | 6     | 1  | 1  | 3 |
| 3.98500 | 22.291 | 9     | 0  | 0  | 2 | 2.10603 | 42.909 | 200   | 0  | -2 | 2 |
| 3.75361 | 23.684 | 2     | 1  | 1  | 0 | 2.10606 | 42.908 | 200   | 0  | 2  | 2 |
| 3.75336 | 23.686 | 2     | -1 | 1  | 0 | 1.99250 | 45.486 | 40    | 0  | 0  | 4 |
| 3.39585 | 26.222 | 1000  | -1 | 1  | 1 | 1.97702 | 45.863 | 676   | 1  | -2 | 2 |
| 3.39568 | 26.223 | 1000  | 1  | 1  | 1 | 1.97712 | 45.860 | 676   | 1  | 2  | 2 |
| 3.27367 | 27.219 | 572   | -1 | 0  | 2 | 1.94972 | 46.542 | 6     | -2 | 0  | 3 |
| 3.27302 | 27.224 | 572   | 1  | 0  | 2 | 1.94931 | 46.553 | 6     | 2  | 0  | 3 |
| 3.10698 | 28.710 | 2     | 0  | 1  | 2 | 1.88242 | 48.310 | 298   | -1 | 0  | 4 |
| 3.10693 | 28.710 | 2     | 0  | -1 | 2 | 1.88218 | 48.317 | 298   | 1  | 0  | 4 |
| 2.86970 | 31.141 | 48    | 2  | 0  | 0 | 1.87668 | 48.467 | 194   | -2 | 2  | 0 |
| 2.73204 | 32.753 | 86    | 1  | -1 | 2 | 1.87681 | 48.464 | 194   | 2  | 2  | 0 |
| 2.73218 | 32.752 | 86    | 1  | 1  | 2 | 1.86038 | 48.920 | 5     | -3 | 0  | 1 |
| 2.69983 | 33.155 | 502   | 2  | 0  | 1 | 1.86020 | 48.925 | 5     | 3  | 0  | 1 |
| 2.70019 | 33.151 | 502   | -2 | 0  | 1 | 1.82678 | 49.880 | 22    | -2 | 2  | 1 |
| 2.48080 | 36.179 | 338   | 0  | 2  | 0 | 1.82666 | 49.884 | 22    | 2  | -2 | 1 |
| 2.48405 | 36.130 | 338   | -2 | 1  | 0 | 1.81435 | 50.246 | 278   | 2  | 1  | 3 |
| 2.41110 | 37.263 | 144   | -1 | 0  | 3 | 1.81427 | 50.248 | 278   | 2  | -1 | 3 |
| 2.41072 | 37.269 | 144   | 1  | 0  | 3 | 1.75978 | 51.918 | 33    | 1  | -1 | 4 |
| 2.37154 | 37.908 | 397   | 2  | 1  | 1 | 1.75983 | 51.916 | 33    | 1  | 1  | 4 |
| 2.37140 | 37.910 | 397   | 2  | -1 | 1 | 1.74176 | 52.495 | 289   | 3  | -1 | 1 |
| 2.34208 | 38.404 | 278   | 0  | 1  | 3 | 1.74191 | 52.491 | 289   | -3 | 1  | 1 |

| d                   | 2θ     | I<br>fix | h  | k  | l | d                   | 2θ     | I<br>fix | h  | k  | l | d                   | 2θ     | I<br>fix | h  | k  | l | d                   | 2θ     | I<br>fix | h  | k  | l |
|---------------------|--------|----------|----|----|---|---------------------|--------|----------|----|----|---|---------------------|--------|----------|----|----|---|---------------------|--------|----------|----|----|---|
| 1.7288 <sub>4</sub> | 52.918 | 77       | 1  | -2 | 3 | 1.4883 <sub>3</sub> | 62.338 | 2        | 3  | 2  | 1 | 1.3283 <sub>3</sub> | 70.887 | 19       | 0  | 0  | 6 | 1.1936 <sub>2</sub> | 80.383 | 4        | 3  | -3 | 2 |
| 1.7289 <sub>2</sub> | 52.916 | 77       | 1  | 2  | 3 | 1.4815 <sub>4</sub> | 62.655 | 2        | 3  | 1  | 3 | 1.3293 <sub>8</sub> | 70.823 | 19       | 3  | -1 | 4 | 1.1888 <sub>5</sub> | 80.772 | 53       | 3  | 1  | 5 |
| 1.7248 <sub>2</sub> | 53.051 | 133      | -3 | 0  | 2 | 1.4817 <sub>6</sub> | 62.645 | 2        | -3 | 1  | 3 | 1.3161 <sub>0</sub> | 71.647 | 2        | -3 | 2  | 3 | 1.1888 <sub>2</sub> | 80.775 | 53       | 3  | -1 | 5 |
| 1.7245 <sub>4</sub> | 53.061 | 133      | 3  | 0  | 2 | 1.4760 <sub>9</sub> | 62.913 | 30       | 1  | -3 | 2 | 1.3159 <sub>0</sub> | 71.660 | 2        | 3  | -2 | 3 | 1.1858 <sub>9</sub> | 81.016 | 6        | -4 | -2 | 2 |
| 1.6977 <sub>3</sub> | 53.966 | 23       | 2  | -2 | 2 | 1.4761 <sub>5</sub> | 62.910 | 30       | 1  | 3  | 2 | 1.3058 <sub>3</sub> | 72.299 | 8        | 1  | 2  | 5 | 1.1857 <sub>0</sub> | 81.032 | 6        | 4  | -2 | 2 |
| 1.6979 <sub>2</sub> | 53.959 | 23       | -2 | 2  | 2 | 1.4670 <sub>9</sub> | 63.343 | 65       | 1  | -1 | 5 | 1.3057 <sub>9</sub> | 72.301 | 8        | 1  | -2 | 5 | 1.1710 <sub>4</sub> | 82.263 | 86       | 0  | 2  | 6 |
| 1.6365 <sub>1</sub> | 56.159 | 26       | 2  | 0  | 4 | 1.4672 <sub>5</sub> | 63.336 | 65       | -1 | -1 | 5 | 1.3025 <sub>9</sub> | 72.507 | 5        | 4  | 1  | 2 | 1.1710 <sub>2</sub> | 82.265 | 86       | 0  | -2 | 6 |
| 1.6368 <sub>3</sub> | 56.147 | 26       | -2 | 0  | 4 | 1.4348 <sub>5</sub> | 64.939 | 4        | 4  | 0  | 0 | 1.3025 <sub>4</sub> | 72.510 | 5        | 4  | -1 | 2 | 1.1632 <sub>4</sub> | 82.936 | 7        | 2  | -3 | 4 |
| 1.6289 <sub>1</sub> | 56.444 | 10       | 3  | -1 | 2 | 1.4328 <sub>9</sub> | 65.039 | 6        | -2 | 3  | 0 | 1.2941 <sub>9</sub> | 73.054 | 2        | -1 | 0  | 6 | 1.1642 <sub>5</sub> | 82.849 | 7        | 4  | 0  | 4 |
| 1.6289 <sub>8</sub> | 56.442 | 10       | 3  | 1  | 2 | 1.4329 <sub>7</sub> | 65.035 | 6        | 2  | 3  | 0 | 1.2940 <sub>7</sub> | 73.062 | 2        | 1  | 0  | 6 | 1.1598 <sub>8</sub> | 83.230 | 29       | 1  | -4 | 2 |
| 1.6193 <sub>6</sub> | 56.807 | 18       | 0  | -3 | 1 | 1.4159 <sub>7</sub> | 65.914 | 5        | 3  | -2 | 2 | 1.2831 <sub>4</sub> | 73.786 | 2        | 0  | -1 | 6 | 1.1599 <sub>2</sub> | 83.226 | 29       | 1  | 4  | 2 |
| 1.6193 <sub>7</sub> | 56.807 | 18       | 0  | 3  | 1 | 1.4160 <sub>6</sub> | 65.909 | 5        | 3  | 2  | 2 | 1.2831 <sub>5</sub> | 73.786 | 2        | 0  | 1  | 6 | 1.1474 <sub>3</sub> | 84.339 | 2        | -1 | 2  | 6 |
| 1.5940 <sub>0</sub> | 57.796 | 2        | 0  | 0  | 5 | 1.4121 <sub>0</sub> | 66.118 | 39       | 4  | 0  | 1 | 1.2611 <sub>6</sub> | 75.293 | 62       | 2  | 3  | 3 | 1.1473 <sub>3</sub> | 84.348 | 2        | 1  | -2 | 6 |
| 1.5891 <sub>7</sub> | 57.988 | 2        | -1 | 3  | 0 | 1.4122 <sub>0</sub> | 66.112 | 39       | -4 | 0  | 1 | 1.2610 <sub>8</sub> | 75.298 | 62       | 2  | -3 | 3 | 1.1385 <sub>6</sub> | 85.150 | 8        | -2 | 4  | 0 |
| 1.5892 <sub>3</sub> | 57.986 | 2        | 1  | 3  | 0 | 1.4102 <sub>5</sub> | 66.216 | 33       | 2  | -3 | 1 | 1.2521 <sub>9</sub> | 75.928 | 2        | 1  | 1  | 6 | 1.1385 <sub>7</sub> | 85.149 | 8        | 0  | 0  | 7 |
| 1.5584 <sub>7</sub> | 59.243 | 59       | 1  | -3 | 1 | 1.4103 <sub>0</sub> | 66.213 | 33       | -2 | 3  | 1 | 1.2521 <sub>7</sub> | 75.929 | 2        | 1  | -1 | 6 | 1.1361 <sub>9</sub> | 85.370 | 3        | -5 | 0  | 1 |
| 1.5585 <sub>6</sub> | 59.239 | 59       | -1 | -3 | 1 | 1.4040 <sub>2</sub> | 66.547 | 34       | 0  | -3 | 3 | 1.2420 <sub>2</sub> | 76.661 | 33       | -4 | 2  | 0 | 1.1361 <sub>2</sub> | 85.376 | 3        | 5  | 0  | 1 |
| 1.5534 <sub>6</sub> | 59.453 | 12       | 0  | -2 | 4 | 1.4040 <sub>4</sub> | 66.546 | 34       | 0  | 3  | 3 | 1.2421 <sub>0</sub> | 76.656 | 33       | 4  | 2  | 0 | 1.1334 <sub>8</sub> | 85.623 | 3        | 4  | 1  | 4 |
| 1.5534 <sub>9</sub> | 59.452 | 12       | 0  | 2  | 4 | 1.3783 <sub>4</sub> | 67.954 | 3        | -4 | 1  | 0 | 1.2404 <sub>0</sub> | 76.780 | 56       | 0  | 4  | 0 | 1.1334 <sub>4</sub> | 85.627 | 3        | 4  | -1 | 4 |
| 1.5357 <sub>8</sub> | 60.208 | 21       | 1  | 0  | 5 | 1.3784 <sub>0</sub> | 67.951 | 3        | 4  | 1  | 0 | 1.2359 <sub>5</sub> | 77.107 | 81       | 3  | -3 | 1 | 1.1318 <sub>2</sub> | 85.779 | 5        | 3  | -3 | 3 |
| 1.5359 <sub>5</sub> | 60.200 | 21       | -1 | 0  | 5 | 1.3660 <sub>2</sub> | 68.652 | 32       | 2  | -2 | 4 | 1.2360 <sub>4</sub> | 77.100 | 81       | 3  | 3  | 1 | 1.1318 <sub>9</sub> | 85.772 | 5        | 3  | 3  | 3 |
| 1.5327 <sub>0</sub> | 60.341 | 5        | 2  | -2 | 3 | 1.3660 <sub>9</sub> | 68.648 | 32       | 2  | 2  | 4 | 1.2233 <sub>7</sub> | 78.049 | 59       | 4  | -1 | 3 | 1.1271 <sub>0</sub> | 86.225 | 16       | 2  | -4 | 1 |
| 1.5327 <sub>9</sub> | 60.337 | 5        | 2  | 2  | 3 | 1.3581 <sub>4</sub> | 69.107 | 47       | 4  | -1 | 1 | 1.2234 <sub>2</sub> | 78.046 | 59       | 4  | 1  | 3 | 1.1271 <sub>3</sub> | 86.222 | 16       | -2 | 4  | 1 |
| 1.5176 <sub>0</sub> | 61.005 | 2        | 0  | -1 | 5 | 1.3581 <sub>9</sub> | 69.104 | 47       | 4  | 1  | 1 | 1.2148 <sub>2</sub> | 78.705 | 16       | 2  | -2 | 5 | 1.1254 <sub>6</sub> | 86.382 | 36       | -1 | 3  | 5 |
| 1.5176 <sub>1</sub> | 61.005 | 2        | 0  | 1  | 5 | 1.3501 <sub>0</sub> | 69.577 | 19       | -4 | 0  | 2 | 1.2150 <sub>0</sub> | 78.691 | 16       | -2 | 2  | 5 | 1.1253 <sub>8</sub> | 86.390 | 36       | 1  | -3 | 5 |
| 1.4994 <sub>3</sub> | 61.825 | 57       | 1  | -2 | 4 | 1.3499 <sub>2</sub> | 69.588 | 19       | 4  | 0  | 2 | 1.2058 <sub>4</sub> | 79.406 | 81       | 3  | -2 | 4 | 1.1168 <sub>5</sub> | 87.214 | 2        | -1 | 0  | 7 |
| 1.4994 <sub>9</sub> | 61.822 | 57       | 1  | 2  | 4 | 1.3416 <sub>8</sub> | 70.078 | 26       | -2 | -1 | 5 | 1.2053 <sub>6</sub> | 79.444 | 81       | 2  | 0  | 6 | 1.1167 <sub>6</sub> | 87.222 | 2        | 1  | 0  | 7 |
| 1.4882 <sub>2</sub> | 62.342 | 2        | 3  | -2 | 1 | 1.3414 <sub>3</sub> | 70.092 | 26       | 2  | -1 | 5 | 1.1937 <sub>0</sub> | 80.377 | 4        | 3  | 3  | 2 | 1.1097 <sub>3</sub> | 87.916 | 5        | 0  | 1  | 7 |

| d                   | 2θ     | l<br>fix | h  | k  | l | d                   | 2θ     | l<br>fix | h | k  | l |
|---------------------|--------|----------|----|----|---|---------------------|--------|----------|---|----|---|
| 1.1097 <sub>2</sub> | 87.917 | 5        | 0  | -1 | 7 | 1.0425 <sub>0</sub> | 95.275 | 12       | 4 | -1 | 5 |
| 1.1075 <sub>4</sub> | 88.135 | 23       | -5 | -1 | 1 | 1.0356 <sub>9</sub> | 96.104 | 39       | 1 | -4 | 4 |
| 1.1074 <sub>4</sub> | 88.145 | 23       | 5  | -1 | 1 | 1.0349 <sub>5</sub> | 96.195 | 39       | 2 | -1 | 7 |
| 1.1029 <sub>4</sub> | 88.598 | 14       | 1  | -4 | 3 |                     |        |          |   |    |   |
| 1.1029 <sub>7</sub> | 88.596 | 14       | 5  | 0  | 2 |                     |        |          |   |    |   |
| 1.0980 <sub>6</sub> | 89.097 | 2        | 3  | 2  | 5 |                     |        |          |   |    |   |
| 1.0980 <sub>1</sub> | 89.102 | 2        | 3  | -2 | 5 |                     |        |          |   |    |   |
| 1.0947 <sub>3</sub> | 89.441 | 15       | 2  | -4 | 2 |                     |        |          |   |    |   |
| 1.0948 <sub>2</sub> | 89.430 | 15       | -2 | -4 | 2 |                     |        |          |   |    |   |
| 1.0895 <sub>0</sub> | 89.986 | 13       | 1  | -1 | 7 |                     |        |          |   |    |   |
| 1.0895 <sub>9</sub> | 89.977 | 13       | -1 | 1  | 7 |                     |        |          |   |    |   |
| 1.0843 <sub>0</sub> | 90.537 | 13       | -2 | 2  | 6 |                     |        |          |   |    |   |
| 1.0841 <sub>4</sub> | 90.554 | 13       | 2  | -2 | 6 |                     |        |          |   |    |   |
| 1.0766 <sub>7</sub> | 91.360 | 2        | 5  | -1 | 2 |                     |        |          |   |    |   |
| 1.0767 <sub>0</sub> | 91.356 | 2        | 5  | 1  | 2 |                     |        |          |   |    |   |
| 1.0738 <sub>7</sub> | 91.666 | 10       | 4  | -3 | 1 |                     |        |          |   |    |   |
| 1.0739 <sub>2</sub> | 91.661 | 10       | -4 | 3  | 1 |                     |        |          |   |    |   |
| 1.0656 <sub>9</sub> | 92.575 | 14       | -2 | 3  | 5 |                     |        |          |   |    |   |
| 1.0655 <sub>6</sub> | 92.590 | 14       | 2  | -3 | 5 |                     |        |          |   |    |   |
| 1.0595 <sub>5</sub> | 93.272 | 2        | 3  | 3  | 4 |                     |        |          |   |    |   |
| 1.0594 <sub>8</sub> | 93.280 | 2        | 3  | -3 | 4 |                     |        |          |   |    |   |
| 1.0582 <sub>4</sub> | 93.422 | 3        | 2  | 0  | 7 |                     |        |          |   |    |   |
| 1.0583 <sub>9</sub> | 93.405 | 3        | -2 | 0  | 7 |                     |        |          |   |    |   |
| 1.0530 <sub>1</sub> | 94.028 | 14       | 0  | -4 | 4 |                     |        |          |   |    |   |
| 1.0539 <sub>3</sub> | 93.922 | 14       | 4  | -2 | 4 |                     |        |          |   |    |   |
| 1.0465 <sub>7</sub> | 94.787 | 2        | -2 | -4 | 3 |                     |        |          |   |    |   |
| 1.0464 <sub>7</sub> | 94.800 | 2        | 2  | -4 | 3 |                     |        |          |   |    |   |
| 1.0427 <sub>3</sub> | 95.247 | 12       | -4 | -1 | 5 |                     |        |          |   |    |   |
