# Supplementary material
Source: MDPI journal article supplement (https://www.mdpi.com/2076-3417/7/5/514)
Supplement: s1 [file s1]

## Rice Husk (Coupled TwoTheta/Theta)

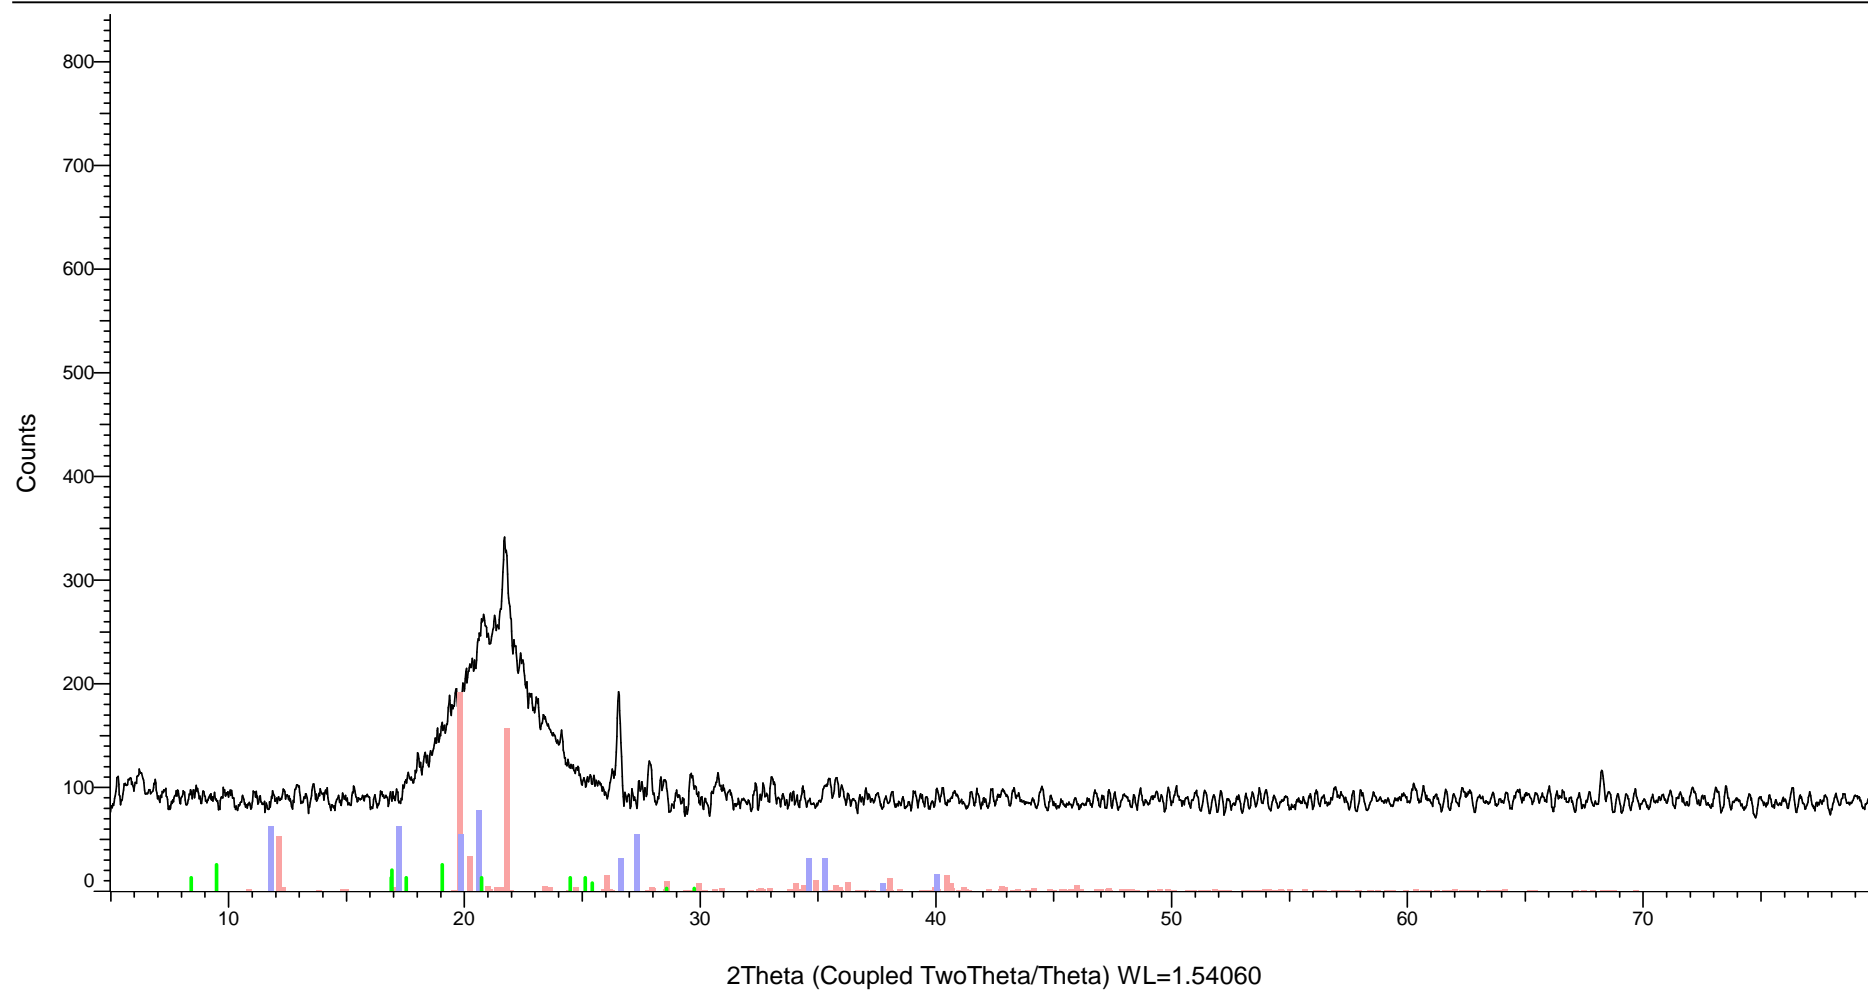

Pattern: PDF 00-063-1436    Radiation: 1.54060    Quality: Rietveld

|                                                                                                                                                                                                                                                                                                                                                                                  |  |  |  |  |  |  |  |  |  |  |  |  |  |  |
|----------------------------------------------------------------------------------------------------------------------------------------------------------------------------------------------------------------------------------------------------------------------------------------------------------------------------------------------------------------------------------|--|--|--|--|--|--|--|--|--|--|--|--|--|--|
| <b>Formula</b> (C6 H10 O5)n                                                                                                                                                                                                                                                                                                                                                      |  |  |  |  |  |  |  |  |  |  |  |  |  |  |
| <b>Name</b> Cellulose II                                                                                                                                                                                                                                                                                                                                                         |  |  |  |  |  |  |  |  |  |  |  |  |  |  |
| <b>Name (mineral)</b>                                                                                                                                                                                                                                                                                                                                                            |  |  |  |  |  |  |  |  |  |  |  |  |  |  |
| <b>Name (common)</b>                                                                                                                                                                                                                                                                                                                                                             |  |  |  |  |  |  |  |  |  |  |  |  |  |  |
| <b>Lattice:</b> Monoclinic                                                                                                                                                                                                                                                                                                                                                       |  |  |  |  |  |  |  |  |  |  |  |  |  |  |
| <b>S.G.:</b> P21 (4)                                                                                                                                                                                                                                                                                                                                                             |  |  |  |  |  |  |  |  |  |  |  |  |  |  |
| <b>Mol. weight =</b> 162.14                                                                                                                                                                                                                                                                                                                                                      |  |  |  |  |  |  |  |  |  |  |  |  |  |  |
| <b>Volume [CD] =</b> 683.53                                                                                                                                                                                                                                                                                                                                                      |  |  |  |  |  |  |  |  |  |  |  |  |  |  |
| <b>Dx =</b>                                                                                                                                                                                                                                                                                                                                                                      |  |  |  |  |  |  |  |  |  |  |  |  |  |  |
| <b>Dm =</b>                                                                                                                                                                                                                                                                                                                                                                      |  |  |  |  |  |  |  |  |  |  |  |  |  |  |
| <b>I/Icor =</b> 1.340                                                                                                                                                                                                                                                                                                                                                            |  |  |  |  |  |  |  |  |  |  |  |  |  |  |
| <b>a =</b> 8.07700                                                                                                                                                                                                                                                                                                                                                               |  |  |  |  |  |  |  |  |  |  |  |  |  |  |
| <b>b =</b> 9.14400                                                                                                                                                                                                                                                                                                                                                               |  |  |  |  |  |  |  |  |  |  |  |  |  |  |
| <b>c =</b> 10.38700                                                                                                                                                                                                                                                                                                                                                              |  |  |  |  |  |  |  |  |  |  |  |  |  |  |
| <b>a/b =</b> 0.88331                                                                                                                                                                                                                                                                                                                                                             |  |  |  |  |  |  |  |  |  |  |  |  |  |  |
| <b>c/b =</b> 1.13594                                                                                                                                                                                                                                                                                                                                                             |  |  |  |  |  |  |  |  |  |  |  |  |  |  |
| <b>alpha =</b>                                                                                                                                                                                                                                                                                                                                                                   |  |  |  |  |  |  |  |  |  |  |  |  |  |  |
| <b>beta =</b>                                                                                                                                                                                                                                                                                                                                                                    |  |  |  |  |  |  |  |  |  |  |  |  |  |  |
| <b>gamma =</b> 117.00                                                                                                                                                                                                                                                                                                                                                            |  |  |  |  |  |  |  |  |  |  |  |  |  |  |
| <b>Z =</b> 4                                                                                                                                                                                                                                                                                                                                                                     |  |  |  |  |  |  |  |  |  |  |  |  |  |  |
| <b>Additional Patterns:</b> See PDF 00-056-1717                                                                                                                                                                                                                                                                                                                                  |  |  |  |  |  |  |  |  |  |  |  |  |  |  |
| <b>Color:</b> White                                                                                                                                                                                                                                                                                                                                                              |  |  |  |  |  |  |  |  |  |  |  |  |  |  |
| <b>Sample Preparation:</b> 45 g Cellulose acetate (Eastman Kodak), 180 g deionized water and 180 g 29.8% aqueous ammonia were stirred at an ambient temperature for 45 hours, heated to 323 K in 1.5 hours and held for 3 hours. The slurry was cooled to 308 K, filtered, washed with 40% V/V acetic acid/water, glacial acetic acid and methanol. The solid was dried at 313 K |  |  |  |  |  |  |  |  |  |  |  |  |  |  |
| <b>Pressure of Datacollection:</b> 101.3 kPa                                                                                                                                                                                                                                                                                                                                     |  |  |  |  |  |  |  |  |  |  |  |  |  |  |
| <b>Temperature of Data Collection:</b> Pattern taken at 300 K                                                                                                                                                                                                                                                                                                                    |  |  |  |  |  |  |  |  |  |  |  |  |  |  |
| <b>Primary Reference</b>                                                                                                                                                                                                                                                                                                                                                         |  |  |  |  |  |  |  |  |  |  |  |  |  |  |
| <b>Publication:</b> Private Communication                                                                                                                                                                                                                                                                                                                                        |  |  |  |  |  |  |  |  |  |  |  |  |  |  |
| <b>Authors:</b> Kaduk, J., Poly Crystallography Inc., Naperville, IL, USA; Blanton, T., Eastman Kodak Company, Rochester, NY, USA.                                                                                                                                                                                                                                               |  |  |  |  |  |  |  |  |  |  |  |  |  |  |
| <b>Radiation:</b> CuKα1                                                                                                                                                                                                                                                                                                                                                          |  |  |  |  |  |  |  |  |  |  |  |  |  |  |
| <b>Wavelength:</b> 1.54060                                                                                                                                                                                                                                                                                                                                                       |  |  |  |  |  |  |  |  |  |  |  |  |  |  |
| <b>SS/FOM:</b> 999.9 (0.0007,30)                                                                                                                                                                                                                                                                                                                                                 |  |  |  |  |  |  |  |  |  |  |  |  |  |  |
| <b>Filter:</b> F                                                                                                                                                                                                                                                                                                                                                                 |  |  |  |  |  |  |  |  |  |  |  |  |  |  |
| <b>d-spacing:</b>                                                                                                                                                                                                                                                                                                                                                                |  |  |  |  |  |  |  |  |  |  |  |  |  |  |

| d                   | 2θ     | I<br>fix | h  | k | l | d                   | 2θ     | I<br>fix | h  | k | l | d                   | 2θ     | I<br>fix | h  | k | l | d                   | 2θ     | I<br>fix | h  | k | l |
|---------------------|--------|----------|----|---|---|---------------------|--------|----------|----|---|---|---------------------|--------|----------|----|---|---|---------------------|--------|----------|----|---|---|
| 2.3605 <sub>1</sub> | 38.092 | 5        | -3 | 1 | 2 | 1.9987 <sub>6</sub> | 45.336 | 12       | 0  | 4 | 1 | 1.7817 <sub>0</sub> | 51.232 | 3        | 2  | 3 | 1 | 1.6348 <sub>9</sub> | 56.220 | 5        | -3 | 1 | 5 |
| 2.3372 <sub>6</sub> | 38.486 | 7        | 3  | 0 | 1 | 1.9974 <sub>9</sub> | 45.366 | 10       | -1 | 1 | 5 | 1.7730 <sub>2</sub> | 51.501 | 5        | -3 | 5 | 0 | 1.6294 <sub>7</sub> | 56.423 | 2        | 0  | 5 | 0 |
| 2.2830 <sub>1</sub> | 39.438 | 4        | -1 | 3 | 3 | 1.9958 <sub>2</sub> | 45.406 | 9        | 1  | 0 | 5 | 1.7726 <sub>9</sub> | 51.512 | 4        | 4  | 0 | 1 | 1.6280 <sub>2</sub> | 56.478 | 4        | -3 | 4 | 4 |
| 2.2705 <sub>6</sub> | 39.663 | 6        | 1  | 2 | 3 | 1.9864 <sub>8</sub> | 45.632 | 2        | -3 | 3 | 3 | 1.7724 <sub>7</sub> | 51.519 | 4        | -3 | 3 | 4 | 1.6170 <sub>7</sub> | 56.895 | 2        | -2 | 5 | 3 |
| 2.2681 <sub>5</sub> | 39.707 | 3        | -2 | 4 | 0 | 1.9819 <sub>0</sub> | 45.743 | 8        | -4 | 2 | 1 | 1.7712 <sub>6</sub> | 51.556 | 5        | 3  | 1 | 3 | 1.6145 <sub>3</sub> | 56.993 | 3        | 3  | 1 | 4 |
| 2.2535 <sub>5</sub> | 39.975 | 20       | -1 | 2 | 4 | 1.9735 <sub>5</sub> | 45.948 | 2        | -1 | 3 | 4 | 1.7619 <sub>9</sub> | 51.848 | 11       | 3  | 0 | 4 | 1.6095 <sub>1</sub> | 57.187 | 3        | -5 | 3 | 0 |
| 2.2463 <sub>4</sub> | 40.109 | 11       | 1  | 1 | 4 | 1.9717 <sub>6</sub> | 45.992 | 27       | 3  | 0 | 3 | 1.7555 <sub>6</sub> | 52.052 | 5        | 0  | 4 | 3 | 1.6029 <sub>9</sub> | 57.441 | 5        | 2  | 3 | 3 |
| 2.2285 <sub>3</sub> | 40.443 | 80       | 1  | 3 | 0 | 1.9654 <sub>9</sub> | 46.147 | 7        | 1  | 2 | 4 | 1.7477 <sub>4</sub> | 52.302 | 5        | -3 | 5 | 1 | 1.6026 <sub>1</sub> | 57.456 | 5        | 0  | 4 | 4 |
| 2.2176 <sub>9</sub> | 40.650 | 42       | -2 | 3 | 3 | 1.9386 <sub>9</sub> | 46.823 | 8        | -3 | 4 | 2 | 1.7441 <sub>0</sub> | 52.420 | 2        | -4 | 2 | 3 | 1.5910 <sub>4</sub> | 57.913 | 3        | -2 | 1 | 6 |
| 2.2159 <sub>3</sub> | 40.684 | 14       | -2 | 4 | 1 | 1.9317 <sub>9</sub> | 47.000 | 9        | -4 | 3 | 1 | 1.7245 <sub>5</sub> | 53.060 | 3        | 3  | 2 | 1 | 1.5906 <sub>4</sub> | 57.929 | 4        | 4  | 1 | 1 |
| 2.1995 <sub>1</sub> | 41.001 | 3        | 2  | 1 | 3 | 1.9308 <sub>9</sub> | 47.023 | 6        | -2 | 3 | 4 | 1.7168 <sub>0</sub> | 53.319 | 4        | -4 | 4 | 2 | 1.5781 <sub>2</sub> | 58.433 | 2        | -3 | 5 | 3 |
| 2.1975 <sub>8</sub> | 41.038 | 5        | -3 | 3 | 2 | 1.9197 <sub>4</sub> | 47.313 | 7        | -4 | 1 | 1 | 1.7096 <sub>6</sub> | 53.559 | 3        | -4 | 3 | 3 | 1.5773 <sub>5</sub> | 58.464 | 5        | -1 | 5 | 3 |
| 2.1943 <sub>8</sub> | 41.101 | 4        | -1 | 4 | 1 | 1.9188 <sub>6</sub> | 47.336 | 14       | 2  | 1 | 4 | 1.7092 <sub>6</sub> | 53.572 | 5        | 1  | 2 | 5 | 1.5703 <sub>3</sub> | 58.751 | 2        | 3  | 0 | 5 |
| 2.1896 <sub>3</sub> | 41.194 | 13       | 0  | 2 | 4 | 1.9160 <sub>4</sub> | 47.410 | 2        | 3  | 1 | 2 | 1.7082 <sub>3</sub> | 53.607 | 3        | -2 | 4 | 4 | 1.5699 <sub>5</sub> | 58.767 | 4        | 1  | 4 | 3 |
| 2.1888 <sub>8</sub> | 41.209 | 22       | 2  | 2 | 1 | 1.8972 <sub>6</sub> | 47.908 | 11       | -2 | 4 | 3 | 1.7079 <sub>1</sub> | 53.618 | 2        | 2  | 3 | 2 | 1.5609 <sub>9</sub> | 59.138 | 3        | 3  | 2 | 3 |
| 2.1840 <sub>4</sub> | 41.304 | 7        | -2 | 1 | 4 | 1.8962 <sub>0</sub> | 47.937 | 5        | 0  | 4 | 2 | 1.7012 <sub>9</sub> | 53.844 | 2        | -4 | 1 | 3 | 1.5547 <sub>3</sub> | 59.400 | 4        | 0  | 5 | 2 |
| 2.1789 <sub>4</sub> | 41.406 | 3        | 1  | 3 | 1 | 1.8886 <sub>9</sub> | 48.140 | 10       | -1 | 2 | 5 | 1.6999 <sub>7</sub> | 53.889 | 5        | 4  | 0 | 2 | 1.5423 <sub>5</sub> | 59.925 | 2        | -5 | 1 | 0 |
| 2.1368 <sub>1</sub> | 42.261 | 9        | 0  | 3 | 3 | 1.8844 <sub>4</sub> | 48.255 | 5        | 1  | 1 | 5 | 1.6983 <sub>0</sub> | 53.946 | 8        | -1 | 4 | 4 | 1.5319 <sub>1</sub> | 60.376 | 7        | -2 | 4 | 5 |
| 2.1135 <sub>3</sub> | 42.749 | 7        | -2 | 2 | 4 | 1.8836 <sub>8</sub> | 48.276 | 2        | -1 | 4 | 3 | 1.6957 <sub>4</sub> | 54.034 | 3        | 2  | 2 | 4 | 1.5256 <sub>2</sub> | 60.651 | 3        | -5 | 1 | 1 |
| 2.1102 <sub>9</sub> | 42.818 | 24       | -3 | 2 | 3 | 1.8817 <sub>9</sub> | 48.327 | 11       | -4 | 2 | 2 | 1.6932 <sub>9</sub> | 54.119 | 8        | 0  | 1 | 6 | 1.5228 <sub>9</sub> | 60.771 | 4        | 2  | 2 | 5 |
| 2.1056 <sub>0</sub> | 42.918 | 3        | 2  | 0 | 4 | 1.8768 <sub>0</sub> | 48.464 | 5        | 0  | 3 | 4 | 1.6911 <sub>1</sub> | 54.194 | 5        | 1  | 3 | 4 | 1.5195 <sub>3</sub> | 60.920 | 3        | 1  | 3 | 5 |
| 2.1043 <sub>7</sub> | 42.944 | 19       | -3 | 1 | 3 | 1.8738 <sub>9</sub> | 48.544 | 2        | 1  | 3 | 3 | 1.6863 <sub>6</sub> | 54.359 | 2        | -2 | 3 | 5 | 1.5121 <sub>0</sub> | 61.251 | 4        | -3 | 6 | 0 |
| 2.0897 <sub>7</sub> | 43.259 | 4        | -3 | 4 | 0 | 1.8547 <sub>0</sub> | 49.079 | 5        | -3 | 1 | 4 | 1.6840 <sub>8</sub> | 54.439 | 2        | -1 | 1 | 6 | 1.5038 <sub>5</sub> | 61.623 | 3        | 2  | 4 | 0 |
| 2.0785 <sub>5</sub> | 43.505 | 8        | -2 | 4 | 2 | 1.8505 <sub>8</sub> | 49.196 | 4        | 0  | 2 | 5 | 1.6783 <sub>2</sub> | 54.641 | 8        | 2  | 1 | 5 | 1.5003 <sub>3</sub> | 61.784 | 4        | 1  | 2 | 6 |
| 2.0607 <sub>4</sub> | 43.900 | 6        | -1 | 4 | 2 | 1.8387 <sub>4</sub> | 49.534 | 9        | -4 | 3 | 2 | 1.6779 <sub>2</sub> | 54.656 | 8        | -3 | 5 | 2 | 1.4963 <sub>2</sub> | 61.968 | 6        | -3 | 6 | 1 |
| 2.0487 <sub>1</sub> | 44.171 | 14       | -3 | 4 | 1 | 1.8283 <sub>4</sub> | 49.835 | 11       | -4 | 1 | 2 | 1.6770 <sub>0</sub> | 54.688 | 4        | -1 | 5 | 2 | 1.4951 <sub>9</sub> | 62.020 | 7        | -2 | 5 | 4 |
| 2.0479 <sub>3</sub> | 44.189 | 3        | 1  | 3 | 2 | 1.8190 <sub>8</sub> | 50.106 | 6        | -4 | 4 | 0 | 1.6681 <sub>1</sub> | 55.004 | 7        | 1  | 4 | 2 | 1.4888 <sub>6</sub> | 62.313 | 4        | -5 | 4 | 2 |
| 2.0189 <sub>9</sub> | 44.857 | 7        | -4 | 2 | 0 | 1.7990 <sub>2</sub> | 50.704 | 4        | 2  | 0 | 5 | 1.6499 <sub>7</sub> | 55.661 | 8        | 0  | 3 | 5 | 1.4883 <sub>3</sub> | 62.337 | 3        | 2  | 4 | 1 |
| 2.0129 <sub>0</sub> | 45.000 | 3        | 0  | 1 | 5 | 1.7918 <sub>0</sub> | 50.923 | 3        | -4 | 4 | 1 | 1.6376 <sub>6</sub> | 56.116 | 3        | -3 | 2 | 5 | 1.4847 <sub>7</sub> | 62.504 | 4        | -2 | 3 | 6 |

| d           | 2θ     | l<br>fix | h  | k | l |
|-------------|--------|----------|----|---|---|
| 1.4840<br>3 | 62.538 | 2        | 2  | 3 | 4 |
| 1.4788<br>2 | 62.784 | 2        | 4  | 0 | 4 |
| 1.4785<br>2 | 62.798 | 5        | -5 | 1 | 2 |
| 1.4776<br>0 | 62.841 | 3        | 3  | 3 | 1 |
| 1.4743<br>4 | 62.996 | 2        | 0  | 5 | 3 |
| 1.4642<br>4 | 63.481 | 3        | -3 | 5 | 4 |
| 1.4632<br>5 | 63.529 | 3        | 3  | 1 | 5 |
| 1.4595<br>9 | 63.707 | 3        | 4  | 1 | 3 |
| 1.4595<br>1 | 63.711 | 2        | -5 | 3 | 3 |
| 1.4543<br>6 | 63.963 | 2        | 0  | 4 | 5 |
| 1.4534<br>5 | 64.008 | 2        | 1  | 5 | 0 |
| 1.4518<br>1 | 64.089 | 3        | -3 | 6 | 2 |
| 1.4505<br>2 | 64.153 | 7        | 3  | 2 | 4 |
| 1.4302<br>1 | 65.176 | 3        | -4 | 6 | 1 |
| 1.4256<br>5 | 65.410 | 3        | 5  | 0 | 1 |
| 1.3927<br>4 | 67.157 | 2        | -2 | 1 | 7 |
| 1.3869<br>9 | 67.473 | 4        | 5  | 0 | 2 |
| 1.3802<br>1 | 67.849 | 3        | 0  | 5 | 4 |
| 1.3726<br>6 | 68.274 | 2        | -2 | 5 | 5 |
| 1.3680<br>9 | 68.534 | 2        | 4  | 1 | 4 |
| 1.3640<br>1 | 68.767 | 4        | 2  | 3 | 5 |
| 1.3481<br>1 | 69.695 | 2        | -1 | 5 | 5 |
