# Supplementary material
Source: MDPI journal article supplement (https://www.mdpi.com/2076-3417/7/5/514)
Supplement: s1 [file s1]

OPT5 Before (Coupled TwoTheta/Theta)

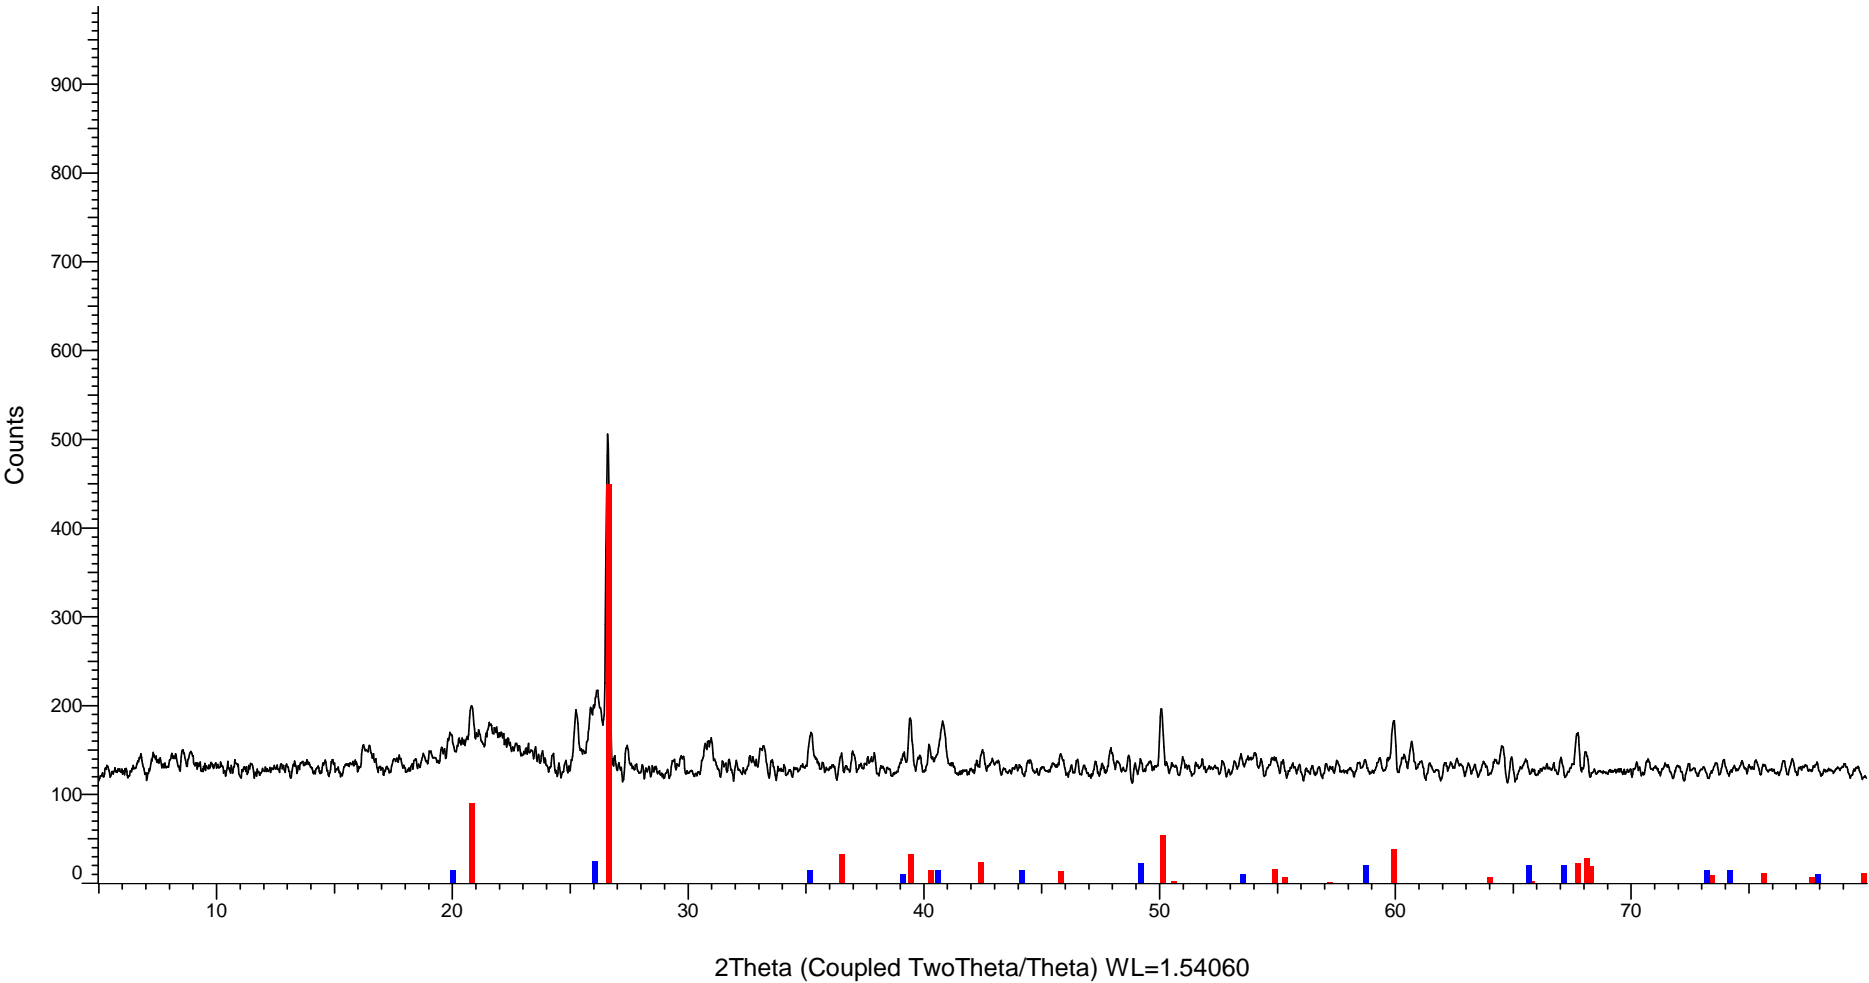

Pattern: PDF 00-007-0346    Radiation: 1.54060    Quality: Low precision

|                                                                                                                                                                                                                                                                                                                                 |  |                                              |        |       |   |   |   |
|---------------------------------------------------------------------------------------------------------------------------------------------------------------------------------------------------------------------------------------------------------------------------------------------------------------------------------|--|----------------------------------------------|--------|-------|---|---|---|
| Formula      Si O2                                                                                                                                                                                                                                                                                                              |  | d                                            | 2θ     | I fix | h | k | l |
| Name            Silicon Oxide                                                                                                                                                                                                                                                                                                   |  | 4.43000                                      | 20.027 | 61    | 1 | 0 | 0 |
| Name (mineral) Quartz                                                                                                                                                                                                                                                                                                           |  | 3.42000                                      | 26.033 | 101   | 1 | 0 | 1 |
| Name            β-Si O2                                                                                                                                                                                                                                                                                                         |  | 2.55000                                      | 35.165 | 61    | 1 | 1 | 0 |
| (common)                                                                                                                                                                                                                                                                                                                        |  | 2.30000                                      | 39.134 | 40    | 1 | 0 | 2 |
|                                                                                                                                                                                                                                                                                                                                 |  | 2.22000                                      | 40.606 | 61    | 2 | 0 | 0 |
|                                                                                                                                                                                                                                                                                                                                 |  | 2.05000                                      | 44.142 | 61    | 2 | 0 | 1 |
|                                                                                                                                                                                                                                                                                                                                 |  | 1.85000                                      | 49.212 | 91    | 1 | 1 | 2 |
| Lattice:      Hexagonal                                                                                                                                                                                                                                                                                                         |  | 1.71000                                      | 53.547 | 40    | 2 | 0 | 2 |
| S.G.:          P6222 (180)                                                                                                                                                                                                                                                                                                      |  | 1.57000                                      | 58.765 | 80    |   |   |   |
|                                                                                                                                                                                                                                                                                                                                 |  | 1.42100                                      | 65.651 | 80    | 2 | 1 | 2 |
|                                                                                                                                                                                                                                                                                                                                 |  | 1.39300                                      | 67.143 | 80    | 2 | 0 | 3 |
|                                                                                                                                                                                                                                                                                                                                 |  | 1.29200                                      | 73.198 | 61    | 3 | 0 | 2 |
|                                                                                                                                                                                                                                                                                                                                 |  | 1.27700                                      | 74.200 | 61    | 2 | 2 | 0 |
|                                                                                                                                                                                                                                                                                                                                 |  | 1.22500                                      | 77.926 | 40    | 3 | 1 | 0 |
|                                                                                                                                                                                                                                                                                                                                 |  | 1.19600                                      | 80.191 | 61    | 3 | 1 | 1 |
|                                                                                                                                                                                                                                                                                                                                 |  | 1.19000                                      | 80.678 | 40    | 1 | 1 | 4 |
|                                                                                                                                                                                                                                                                                                                                 |  | 1.11300                                      | 87.592 | 20    | 3 | 1 | 2 |
|                                                                                                                                                                                                                                                                                                                                 |  | 1.10500                                      | 88.390 | 20    | 4 | 0 | 0 |
|                                                                                                                                                                                                                                                                                                                                 |  | 1.04400                                      | 95.095 | 20    | 1 | 0 | 5 |
| Deleted Or Rejected By: Deleted: JVS during 6-10 revision<br>Sample Preparation: Fired to 1000 C, the sample develops β-quartz which is retained down to room temperature<br>Sample Source or Locality: Sample of montmorillonite from Otay, California, USA<br>Warning: One or more of the three strongest lines are unindexed |  |                                              |        |       |   |   |   |
| Primary Reference<br>Publication: Am. Mineral.<br>Detail: volume 36, page 182 (1951)<br>Authors: Bradley, Grim.                                                                                                                                                                                                                 |  |                                              |        |       |   |   |   |
| Radiation:<br>Wavelength: 1.54060<br>h:            5.8 (0.091,34)<br>SS/FOM:                                                                                                                                                                                                                                                    |  | Filter:          Not specified<br>d-spacing: |        |       |   |   |   |

Pattern: PDF 01-079-1910    Radiation: 1.54060    Quality: Star (\*)

|                                                                                                                                                                                                                                                                                                                                                                                                                                                                                      |  |         |            |       |   |   |   |
|--------------------------------------------------------------------------------------------------------------------------------------------------------------------------------------------------------------------------------------------------------------------------------------------------------------------------------------------------------------------------------------------------------------------------------------------------------------------------------------|--|---------|------------|-------|---|---|---|
| <div>FormulaSi O2</div> <div>NameSilicon Oxide</div> <div>Name (mineral)Quartz, syn</div> <div>Name (common)<math>\alpha</math>-Si O2</div>                                                                                                                                                                                                                                                                                                                                          |  | d       | 2 $\theta$ | I fix | h | k | l |
|                                                                                                                                                                                                                                                                                                                                                                                                                                                                                      |  | 4.25565 | 20.857     | 200   | 1 | 0 | 0 |
|                                                                                                                                                                                                                                                                                                                                                                                                                                                                                      |  | 3.34387 | 26.637     | 1000  | 0 | 1 | 1 |
|                                                                                                                                                                                                                                                                                                                                                                                                                                                                                      |  | 2.45700 | 36.542     | 72    | 1 | 1 | 0 |
|                                                                                                                                                                                                                                                                                                                                                                                                                                                                                      |  | 2.28166 | 39.462     | 72    | 0 | 1 | 2 |
|                                                                                                                                                                                                                                                                                                                                                                                                                                                                                      |  | 2.23681 | 40.287     | 32    | 1 | 1 | 1 |
|                                                                                                                                                                                                                                                                                                                                                                                                                                                                                      |  | 2.12782 | 42.448     | 53    | 2 | 0 | 0 |
|                                                                                                                                                                                                                                                                                                                                                                                                                                                                                      |  | 1.97997 | 45.790     | 30    | 0 | 2 | 1 |
| <div>Lattice:Hexagonal</div> <div>S.G.:P3121 (152)</div> <div>Mol. weight = 60.08</div> <div>Volume [CD] = 113.05</div> <div>Dx = 2.65</div> <div>Dm =</div> <div>I/Icor = 3.070</div>                                                                                                                                                                                                                                                                                               |  | 1.81812 | 50.134     | 120   | 1 | 1 | 2 |
|                                                                                                                                                                                                                                                                                                                                                                                                                                                                                      |  | 1.80200 | 50.614     | 4     | 0 | 0 | 3 |
|                                                                                                                                                                                                                                                                                                                                                                                                                                                                                      |  | 1.67193 | 54.868     | 36    | 0 | 2 | 2 |
|                                                                                                                                                                                                                                                                                                                                                                                                                                                                                      |  | 1.65937 | 55.319     | 16    | 1 | 0 | 3 |
|                                                                                                                                                                                                                                                                                                                                                                                                                                                                                      |  | 1.60848 | 57.227     | 2     | 2 | 1 | 0 |
|                                                                                                                                                                                                                                                                                                                                                                                                                                                                                      |  | 1.54169 | 59.953     | 85    | 2 | 1 | 1 |
|                                                                                                                                                                                                                                                                                                                                                                                                                                                                                      |  | 1.45309 | 64.026     | 16    | 1 | 1 | 3 |
|                                                                                                                                                                                                                                                                                                                                                                                                                                                                                      |  | 1.41855 | 65.779     | 4     | 3 | 0 | 0 |
| <div>a = 4.91400</div> <div>b =</div> <div>c = 5.40600</div> <div>a/b = 1.00000</div> <div>c/b = 1.10012</div> <div>alpha =</div> <div>beta =</div> <div>gamma =</div> <div>Z = 3</div>                                                                                                                                                                                                                                                                                              |  | 1.38226 | 67.735     | 51    | 2 | 1 | 2 |
|                                                                                                                                                                                                                                                                                                                                                                                                                                                                                      |  | 1.37513 | 68.134     | 63    | 0 | 2 | 3 |
|                                                                                                                                                                                                                                                                                                                                                                                                                                                                                      |  | 1.37210 | 68.306     | 41    | 0 | 3 | 1 |
|                                                                                                                                                                                                                                                                                                                                                                                                                                                                                      |  | 1.28810 | 73.455     | 20    | 0 | 1 | 4 |
|                                                                                                                                                                                                                                                                                                                                                                                                                                                                                      |  | 1.25608 | 75.651     | 25    | 0 | 3 | 2 |
|                                                                                                                                                                                                                                                                                                                                                                                                                                                                                      |  | 1.22850 | 77.662     | 14    | 2 | 2 | 0 |
|                                                                                                                                                                                                                                                                                                                                                                                                                                                                                      |  | 1.19998 | 79.871     | 26    | 1 | 2 | 3 |
|                                                                                                                                                                                                                                                                                                                                                                                                                                                                                      |  | 1.19796 | 80.033     | 8     | 2 | 2 | 1 |
| <div>ANX: AX2</div> <div>Analysis: O2 Si1</div> <div>Formula from original source: Si O2</div> <div>ICSD Collection Code: 67121</div> <div>Calculated Pattern Original Remarks: Isotropic temperature factors obtained from room pressure refinement. Refinement was constrained to have a twin fraction of .035+3. Stable up to 846 K, above P6222, above 1143 K tridymite is stable</div> <div>Wyckoff Sequence: c a(P3121)</div> <div>Unit Cell Data Source: Single Crystal</div> |  | 1.18418 | 81.157     | 22    | 1 | 1 | 4 |
|                                                                                                                                                                                                                                                                                                                                                                                                                                                                                      |  | 1.18030 | 81.480     | 24    | 3 | 1 | 0 |
|                                                                                                                                                                                                                                                                                                                                                                                                                                                                                      |  | 1.15314 | 83.826     | 16    | 1 | 3 | 1 |
|                                                                                                                                                                                                                                                                                                                                                                                                                                                                                      |  | 1.14083 | 84.941     | 2     | 0 | 2 | 4 |
|                                                                                                                                                                                                                                                                                                                                                                                                                                                                                      |  | 1.11841 | 87.062     | 1     | 2 | 2 | 2 |
|                                                                                                                                                                                                                                                                                                                                                                                                                                                                                      |  | 1.11462 | 87.433     | 2     | 0 | 3 | 3 |
|                                                                                                                                                                                                                                                                                                                                                                                                                                                                                      |  | 1.08168 | 90.817     | 23    | 1 | 3 | 2 |
|                                                                                                                                                                                                                                                                                                                                                                                                                                                                                      |  | 1.06391 | 92.776     | 4     | 4 | 0 | 0 |
| <div>Structure</div> <div>Publication: Solid State Commun.</div> <div>Detail: volume 72, page 507 (1989)</div> <div>Authors: Hazen, R.M., Finger, L.W., Hemley, R.J., Mao, H.K.</div> <div>Primary Reference</div> <div>Publication: Calculated from ICSD using POWD-12++</div>                                                                                                                                                                                                      |  | 1.04791 | 94.628     | 13    | 1 | 0 | 5 |
|                                                                                                                                                                                                                                                                                                                                                                                                                                                                                      |  | 1.04389 | 95.108     | 8     | 0 | 4 | 1 |
|                                                                                                                                                                                                                                                                                                                                                                                                                                                                                      |  | 1.03473 | 96.223     | 13    | 1 | 2 | 4 |
|                                                                                                                                                                                                                                                                                                                                                                                                                                                                                      |  | 1.01506 | 98.730     | 11    | 2 | 2 | 3 |
|                                                                                                                                                                                                                                                                                                                                                                                                                                                                                      |  | 0.98962 | 102.225    | 8     | 1 | 1 | 5 |
|                                                                                                                                                                                                                                                                                                                                                                                                                                                                                      |  | 0.98962 | 102.225    | 8     | 0 | 4 | 2 |
|                                                                                                                                                                                                                                                                                                                                                                                                                                                                                      |  | 0.98736 | 102.551    | 6     | 3 | 1 | 3 |
|                                                                                                                                                                                                                                                                                                                                                                                                                                                                                      |  | 0.97850 | 103.854    | 4     | 0 | 3 | 4 |
| <div>Radiation: CuK<math>\alpha</math>1</div> <div>Wavelength: 1.54060</div> <div>SS/FOM: 999.9 (0,30)</div> <div>Filter: Not specified</div> <div>d-spacing:</div>                                                                                                                                                                                                                                                                                                                  |  | 0.97631 | 104.182    | 7     | 3 | 2 | 0 |
|                                                                                                                                                                                                                                                                                                                                                                                                                                                                                      |  | 0.96390 | 106.098    | 1     | 0 | 2 | 5 |
|                                                                                                                                                                                                                                                                                                                                                                                                                                                                                      |  | 0.96077 | 106.596    | 13    | 3 | 2 | 1 |
|                                                                                                                                                                                                                                                                                                                                                                                                                                                                                      |  | 0.92866 | 112.090    | 1     | 4 | 1 | 0 |
|                                                                                                                                                                                                                                                                                                                                                                                                                                                                                      |  | 0.91825 | 114.044    | 6     | 2 | 3 | 2 |
|                                                                                                                                                                                                                                                                                                                                                                                                                                                                                      |  | 0.91615 | 114.449    | 11    | 0 | 4 | 3 |
|                                                                                                                                                                                                                                                                                                                                                                                                                                                                                      |  | 0.91525 | 114.624    | 13    | 1 | 4 | 1 |
|                                                                                                                                                                                                                                                                                                                                                                                                                                                                                      |  | 0.90906 | 115.851    | 4     | 2 | 2 | 4 |
|                                                                                                                                                                                                                                                                                                                                                                                                                                                                                      |  | 0.90100 | 117.506    | 1     | 0 | 0 | 6 |
|                                                                                                                                                                                                                                                                                                                                                                                                                                                                                      |  | 0.89732 | 118.285    | 8     | 2 | 1 | 5 |
|                                                                                                                                                                                                                                                                                                                                                                                                                                                                                      |  | 0.88901 | 120.103    | 8     | 1 | 3 | 4 |

|         |         |    |   |   |   |
|---------|---------|----|---|---|---|
| 0.88146 | 121.828 | 2  | 0 | 1 | 6 |
| 0.87827 | 122.581 | 6  | 4 | 1 | 2 |
| 0.85990 | 127.222 | 2  | 0 | 3 | 5 |
| 0.85842 | 127.623 | 1  | 3 | 2 | 3 |
| 0.84592 | 131.180 | 2  | 1 | 1 | 6 |
| 0.84077 | 132.748 | 1  | 0 | 5 | 1 |
| 0.83597 | 134.277 | 1  | 0 | 4 | 4 |
| 0.82968 | 136.381 | 11 | 2 | 0 | 6 |
| 0.82549 | 137.861 | 12 | 1 | 4 | 3 |
| 0.81900 | 140.284 | 4  | 3 | 3 | 0 |
| 0.81183 | 143.187 | 14 | 2 | 2 | 5 |
| 0.81183 | 143.187 | 14 | 0 | 5 | 2 |
| 0.80976 | 144.079 | 4  | 3 | 3 | 1 |
| 0.80424 | 146.590 | 8  | 4 | 2 | 0 |
