# Supplementary material
Source: MDPI journal article supplement (https://www.mdpi.com/2076-3417/7/5/514)
Supplement: s1 [file s1]

OPT5 Before (Coupled TwoTheta/Theta)

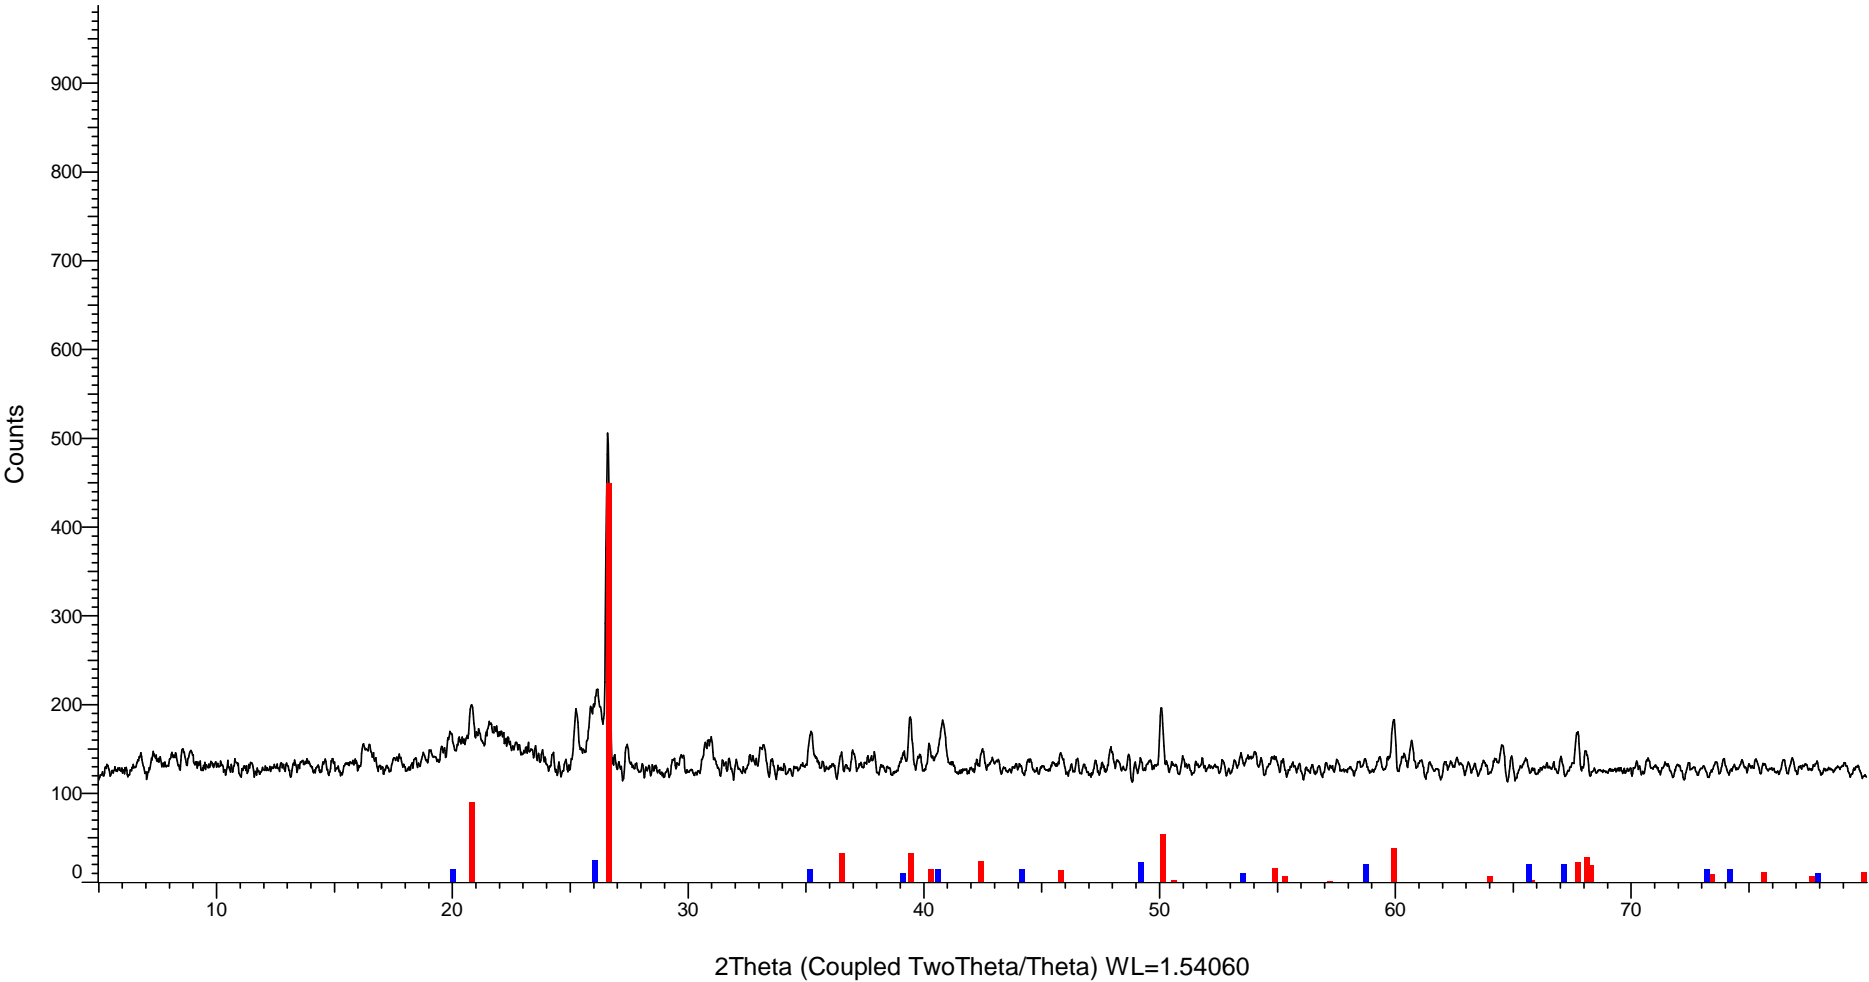

Pattern: PDF 00-007-0346    Radiation: 1.54060    Quality: Low precision

|                                                                                                                                                                                                                                                                                                                                 |  |                                              |        |       |   |   |   |
|---------------------------------------------------------------------------------------------------------------------------------------------------------------------------------------------------------------------------------------------------------------------------------------------------------------------------------|--|----------------------------------------------|--------|-------|---|---|---|
| Formula      Si O2                                                                                                                                                                                                                                                                                                              |  | d                                            | 2θ     | I fix | h | k | l |
| Name            Silicon Oxide                                                                                                                                                                                                                                                                                                   |  | 4.43000                                      | 20.027 | 61    | 1 | 0 | 0 |
| Name (mineral) Quartz                                                                                                                                                                                                                                                                                                           |  | 3.42000                                      | 26.033 | 101   | 1 | 0 | 1 |
| Name            β-Si O2                                                                                                                                                                                                                                                                                                         |  | 2.55000                                      | 35.165 | 61    | 1 | 1 | 0 |
| (common)                                                                                                                                                                                                                                                                                                                        |  | 2.30000                                      | 39.134 | 40    | 1 | 0 | 2 |
|                                                                                                                                                                                                                                                                                                                                 |  | 2.22000                                      | 40.606 | 61    | 2 | 0 | 0 |
|                                                                                                                                                                                                                                                                                                                                 |  | 2.05000                                      | 44.142 | 61    | 2 | 0 | 1 |
|                                                                                                                                                                                                                                                                                                                                 |  | 1.85000                                      | 49.212 | 91    | 1 | 1 | 2 |
| Lattice:      Hexagonal                                                                                                                                                                                                                                                                                                         |  | 1.71000                                      | 53.547 | 40    | 2 | 0 | 2 |
| S.G.:          P6222 (180)                                                                                                                                                                                                                                                                                                      |  | 1.57000                                      | 58.765 | 80    |   |   |   |
|                                                                                                                                                                                                                                                                                                                                 |  | 1.42100                                      | 65.651 | 80    | 2 | 1 | 2 |
|                                                                                                                                                                                                                                                                                                                                 |  | 1.39300                                      | 67.143 | 80    | 2 | 0 | 3 |
|                                                                                                                                                                                                                                                                                                                                 |  | 1.29200                                      | 73.198 | 61    | 3 | 0 | 2 |
|                                                                                                                                                                                                                                                                                                                                 |  | 1.27700                                      | 74.200 | 61    | 2 | 2 | 0 |
|                                                                                                                                                                                                                                                                                                                                 |  | 1.22500                                      | 77.926 | 40    | 3 | 1 | 0 |
|                                                                                                                                                                                                                                                                                                                                 |  | 1.19600                                      | 80.191 | 61    | 3 | 1 | 1 |
|                                                                                                                                                                                                                                                                                                                                 |  | 1.19000                                      | 80.678 | 40    | 1 | 1 | 4 |
|                                                                                                                                                                                                                                                                                                                                 |  | 1.11300                                      | 87.592 | 20    | 3 | 1 | 2 |
|                                                                                                                                                                                                                                                                                                                                 |  | 1.10500                                      | 88.390 | 20    | 4 | 0 | 0 |
|                                                                                                                                                                                                                                                                                                                                 |  | 1.04400                                      | 95.095 | 20    | 1 | 0 | 5 |
| Deleted Or Rejected By: Deleted: JVS during 6-10 revision<br>Sample Preparation: Fired to 1000 C, the sample develops β-quartz which is retained down to room temperature<br>Sample Source or Locality: Sample of montmorillonite from Otay, California, USA<br>Warning: One or more of the three strongest lines are unindexed |  |                                              |        |       |   |   |   |
| Primary Reference<br>Publication: Am. Mineral.<br>Detail: volume 36, page 182 (1951)<br>Authors: Bradley, Grim.                                                                                                                                                                                                                 |  |                                              |        |       |   |   |   |
| Radiation:<br>Wavelengt    1.54060<br>h:<br>SS/FOM:      5.8 (0.091,34)                                                                                                                                                                                                                                                         |  | Filter:          Not specified<br>d-spacing: |        |       |   |   |   |
