# Supplementary material
Source: MDPI journal article supplement (https://www.mdpi.com/2076-3417/7/5/514)
Supplement: s1 [file s1]

## POFA (Coupled TwoTheta/Theta)

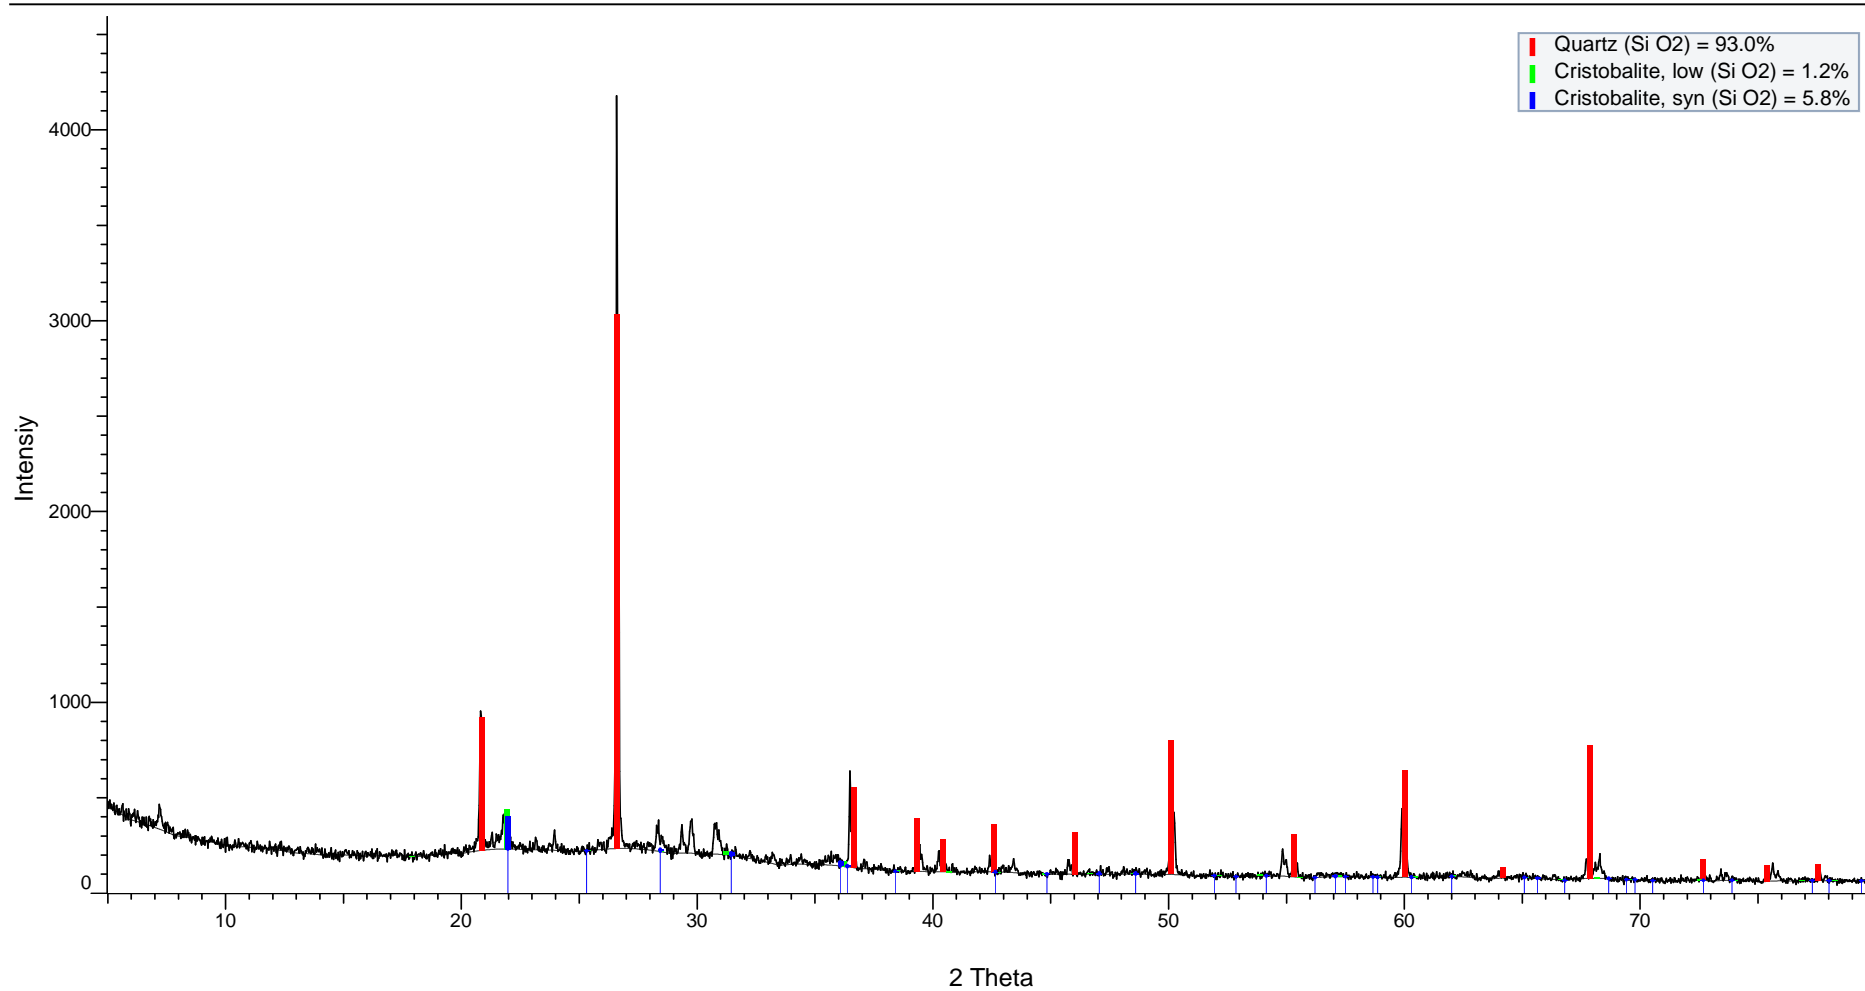

Pattern: PDF 00-001-0649    Radiation: 1.54060    Quality: Blank

|                                                                                                                                                                                   |  |                                       |           |              |          |          |          |
|-----------------------------------------------------------------------------------------------------------------------------------------------------------------------------------|--|---------------------------------------|-----------|--------------|----------|----------|----------|
| <b>Formula</b> Si O2<br><b>Name</b> Silicon Oxide<br><b>Name (mineral)</b> Quartz<br><b>Name (common)</b>                                                                         |  | <b>d</b>                              | <b>2θ</b> | <b>I fix</b> | <b>h</b> | <b>k</b> | <b>l</b> |
|                                                                                                                                                                                   |  | 4.25000                               | 20.885    | 26           | 1        | 0        | 0        |
|                                                                                                                                                                                   |  | 3.35000                               | 26.587    | 101          | 1        | 0        | 1        |
|                                                                                                                                                                                   |  | 2.45000                               | 36.650    | 16           | 1        | 1        | 0        |
|                                                                                                                                                                                   |  | 2.29000                               | 39.312    | 11           | 1        | 0        | 2        |
|                                                                                                                                                                                   |  | 2.23000                               | 40.416    | 7            | 1        | 1        | 1        |
|                                                                                                                                                                                   |  | 2.12000                               | 42.612    | 10           | 2        | 0        | 0        |
|                                                                                                                                                                                   |  | 1.97000                               | 46.035    | 9            | 2        | 0        | 1        |
|                                                                                                                                                                                   |  | 1.82000                               | 50.079    | 26           | 1        | 1        | 2        |
|                                                                                                                                                                                   |  | 1.66000                               | 55.296    | 9            | 1        | 0        | 3        |
|                                                                                                                                                                                   |  | 1.54000                               | 60.026    | 21           | 2        | 1        | 1        |
|                                                                                                                                                                                   |  | 1.45000                               | 64.179    | 3            | 1        | 1        | 3        |
|                                                                                                                                                                                   |  | 1.38000                               | 67.861    | 26           | 2        | 1        | 2        |
|                                                                                                                                                                                   |  | 1.30000                               | 72.675    | 5            | 1        | 0        | 4        |
|                                                                                                                                                                                   |  | 1.26000                               | 75.374    | 4            | 3        | 0        | 2        |
|                                                                                                                                                                                   |  | 1.23000                               | 77.549    | 4            | 2        | 2        | 0        |
|                                                                                                                                                                                   |  | 1.20000                               | 79.870    | 7            | 2        | 1        | 3        |
|                                                                                                                                                                                   |  | 1.18000                               | 81.506    | 9            | 1        | 1        | 4        |
|                                                                                                                                                                                   |  | 1.16000                               | 83.219    | 2            | 3        | 1        | 1        |
|                                                                                                                                                                                   |  | 1.08000                               | 90.998    | 5            | 3        | 1        | 2        |
|                                                                                                                                                                                   |  | 1.05000                               | 94.381    | 3            | 1        | 0        | 5        |
|                                                                                                                                                                                   |  | 1.04000                               | 95.578    | 2            | 4        | 0        | 1        |
|                                                                                                                                                                                   |  | 1.02000                               | 98.085    | 2            | 2        | 2        | 3        |
|                                                                                                                                                                                   |  |                                       |           |              |          |          |          |
| <b>Lattice:</b> Hexagonal<br><b>S.G.:</b> P3221 (154)<br><b>Mol. weight =</b> 60.08<br><b>Volume [CD] =</b> 112.28<br><b>Dx =</b><br><b>Dm =</b> 2.649<br><b>l/lcor =</b> -1.000  |  |                                       |           |              |          |          |          |
| <b>a =</b> 4.90300 <b>alpha =</b><br><b>b =</b><br><b>c =</b> 5.39300 <b>beta =</b><br><b>a/b</b> 1.00000 <b>gamma</b><br><b>=</b><br><b>c/b</b> 1.09994 <b>Z =</b> 3<br><b>=</b> |  |                                       |           |              |          |          |          |
| Color: Colorless<br>Deleted Or Rejected By: Deleted by NBS 00-005-0490<br>Warning: Lines with abs(delta 2Theta)>0.2 DEG                                                           |  |                                       |           |              |          |          |          |
| Primary Reference<br>Publication: Anal. Chem.<br>Detail: volume 10, page 475 (1938)<br>Authors: Hanawalt, J., et al.                                                              |  |                                       |           |              |          |          |          |
| <b>Radiation:</b> MoKα1<br><b>Wavelength:</b> 1.54060<br><b>h:</b><br><b>SS/FOM:</b> 6.4 (0.098,35)                                                                               |  | <b>Filter:</b> F<br><b>d-spacing:</b> |           |              |          |          |          |

Pattern: PDF 01-071-3839    Radiation: 1.54060    Quality: Indexed

|                                                                                                               |  |  |  |  |  |  |  |  |  |  |  |  |  |  |
|---------------------------------------------------------------------------------------------------------------|--|--|--|--|--|--|--|--|--|--|--|--|--|--|
| <b>Formula</b> Si O2                                                                                          |  |  |  |  |  |  |  |  |  |  |  |  |  |  |
| <b>Name</b> Silicon Oxide                                                                                     |  |  |  |  |  |  |  |  |  |  |  |  |  |  |
| <b>Name (mineral)</b> Cristobalite, low                                                                       |  |  |  |  |  |  |  |  |  |  |  |  |  |  |
| <b>Name (common)</b>                                                                                          |  |  |  |  |  |  |  |  |  |  |  |  |  |  |
| <b>Lattice:</b> Orthorhombic                                                                                  |  |  |  |  |  |  |  |  |  |  |  |  |  |  |
| <b>S.G.:</b> P212121 (19)                                                                                     |  |  |  |  |  |  |  |  |  |  |  |  |  |  |
| <b>Mol. weight =</b> 60.08                                                                                    |  |  |  |  |  |  |  |  |  |  |  |  |  |  |
| <b>Volume [CD] =</b> 344.47                                                                                   |  |  |  |  |  |  |  |  |  |  |  |  |  |  |
| <b>Dx =</b> 2.32                                                                                              |  |  |  |  |  |  |  |  |  |  |  |  |  |  |
| <b>Dm =</b>                                                                                                   |  |  |  |  |  |  |  |  |  |  |  |  |  |  |
| <b>l/lcor =</b> 5.650                                                                                         |  |  |  |  |  |  |  |  |  |  |  |  |  |  |
| <b>a =</b> 7.01000                                                                                            |  |  |  |  |  |  |  |  |  |  |  |  |  |  |
| <b>b =</b> 7.01000                                                                                            |  |  |  |  |  |  |  |  |  |  |  |  |  |  |
| <b>c =</b> 7.01000                                                                                            |  |  |  |  |  |  |  |  |  |  |  |  |  |  |
| <b>a/b =</b> 1.00000                                                                                          |  |  |  |  |  |  |  |  |  |  |  |  |  |  |
| <b>c/b =</b> 1.00000                                                                                          |  |  |  |  |  |  |  |  |  |  |  |  |  |  |
| <b>alpha =</b>                                                                                                |  |  |  |  |  |  |  |  |  |  |  |  |  |  |
| <b>beta =</b>                                                                                                 |  |  |  |  |  |  |  |  |  |  |  |  |  |  |
| <b>gamma =</b>                                                                                                |  |  |  |  |  |  |  |  |  |  |  |  |  |  |
| <b>Z =</b> 8                                                                                                  |  |  |  |  |  |  |  |  |  |  |  |  |  |  |
| <b>ANX: AX2</b>                                                                                               |  |  |  |  |  |  |  |  |  |  |  |  |  |  |
| <b>Analysis: O2 Si1</b>                                                                                       |  |  |  |  |  |  |  |  |  |  |  |  |  |  |
| <b>Formula from original source: Si O2</b>                                                                    |  |  |  |  |  |  |  |  |  |  |  |  |  |  |
| <b>ICSD Collection Code: 52371</b>                                                                            |  |  |  |  |  |  |  |  |  |  |  |  |  |  |
| <b>Minor Warning: No R factors reported/abstracted. Magnitude of e.s.d. on cell dimension is &gt;1000 ppm</b> |  |  |  |  |  |  |  |  |  |  |  |  |  |  |
| <b>Wyckoff Sequence: a6(P212121)</b>                                                                          |  |  |  |  |  |  |  |  |  |  |  |  |  |  |
| <b>Unit Cell Data Source: Single Crystal</b>                                                                  |  |  |  |  |  |  |  |  |  |  |  |  |  |  |
| <b>Structure</b>                                                                                              |  |  |  |  |  |  |  |  |  |  |  |  |  |  |
| <b>Publication: Amer. J. Sci.</b>                                                                             |  |  |  |  |  |  |  |  |  |  |  |  |  |  |
| <b>Detail: volume 24, page 97 (1932)</b>                                                                      |  |  |  |  |  |  |  |  |  |  |  |  |  |  |
| <b>Authors: Barth, T.F.W.</b>                                                                                 |  |  |  |  |  |  |  |  |  |  |  |  |  |  |
| <b>Primary Reference</b>                                                                                      |  |  |  |  |  |  |  |  |  |  |  |  |  |  |
| <b>Publication: Calculated from ICSD using POWD-12++</b>                                                      |  |  |  |  |  |  |  |  |  |  |  |  |  |  |
| <b>Radiation:</b> CuKα1                                                                                       |  |  |  |  |  |  |  |  |  |  |  |  |  |  |
| <b>Wavelength:</b> 1.54060                                                                                    |  |  |  |  |  |  |  |  |  |  |  |  |  |  |
| <b>SS/FOM:</b> 999.9 (0,30)                                                                                   |  |  |  |  |  |  |  |  |  |  |  |  |  |  |
| <b>Filter:</b> Not specified                                                                                  |  |  |  |  |  |  |  |  |  |  |  |  |  |  |
| <b>d-spacing:</b>                                                                                             |  |  |  |  |  |  |  |  |  |  |  |  |  |  |

| d                   | 2θ                  | I<br>fix | h | k | l | d                   | 2θ                  | I<br>fix | h | k | l | d                   | 2θ                  | I<br>fix | h | k | l |
|---------------------|---------------------|----------|---|---|---|---------------------|---------------------|----------|---|---|---|---------------------|---------------------|----------|---|---|---|
| 1.1524 <sub>4</sub> | 83.889              | 2        | 6 | 1 | 0 | 0.9539 <sub>4</sub> | 107.70 <sub>3</sub> | 8        | 3 | 3 | 6 | 0.8261 <sub>4</sub> | 137.62 <sub>8</sub> | 3        | 6 | 6 | 0 |
| 1.1524 <sub>4</sub> | 83.889              | 2        | 0 | 1 | 6 | 0.9539 <sub>4</sub> | 107.70 <sub>3</sub> | 8        | 5 | 5 | 2 | 0.8204 <sub>6</sub> | 139.72 <sub>4</sub> | 2        | 8 | 0 | 3 |
| 1.1371 <sub>7</sub> | 85.279              | 8        | 1 | 1 | 6 | 0.9367 <sub>5</sub> | 110.63 <sub>3</sub> | 5        | 4 | 6 | 2 | 0.8204 <sub>6</sub> | 139.72 <sub>4</sub> | 2        | 3 | 8 | 0 |
| 1.1371 <sub>7</sub> | 85.279              | 8        | 3 | 5 | 2 | 0.9367 <sub>5</sub> | 110.63 <sub>3</sub> | 5        | 6 | 4 | 2 | 0.8149 <sub>0</sub> | 141.91 <sub>4</sub> | 8        | 3 | 1 | 8 |
| 1.1083 <sub>8</sub> | 88.051              | 5        | 2 | 0 | 6 | 0.9285 <sub>0</sub> | 112.12 <sub>0</sub> | 3        | 4 | 4 | 5 | 0.8149 <sub>0</sub> | 141.91 <sub>4</sub> | 8        | 3 | 7 | 4 |
| 1.1083 <sub>8</sub> | 88.051              | 5        | 0 | 2 | 6 | 0.9285 <sub>0</sub> | 112.12 <sub>0</sub> | 3        | 2 | 2 | 7 | 0.8094 <sub>5</sub> | 144.21 <sub>7</sub> | 7        | 5 | 5 | 5 |
| 1.0947 <sub>8</sub> | 89.435              | 13       | 6 | 2 | 1 | 0.9204 <sub>6</sub> | 113.62 <sub>1</sub> | 3        | 7 | 3 | 0 | 0.8094 <sub>5</sub> | 144.21 <sub>7</sub> | 7        | 7 | 1 | 5 |
| 1.0947 <sub>8</sub> | 89.435              | 13       | 0 | 4 | 5 | 0.9204 <sub>6</sub> | 113.62 <sub>1</sub> | 3        | 0 | 3 | 7 | 0.8041 <sub>0</sub> | 146.65 <sub>6</sub> | 5        | 6 | 2 | 6 |
| 1.0816 <sub>7</sub> | 90.819              | 2        | 1 | 5 | 4 | 0.9126 <sub>2</sub> | 115.14 <sub>1</sub> | 9        | 1 | 7 | 3 | 0.8041 <sub>0</sub> | 146.65 <sub>6</sub> | 5        | 2 | 6 | 6 |
| 1.0816 <sub>7</sub> | 90.819              | 2        | 1 | 4 | 5 | 0.9126 <sub>2</sub> | 115.14 <sub>1</sub> | 9        | 7 | 1 | 3 | 0.7988 <sub>6</sub> | 149.26 <sub>4</sub> | 5        | 8 | 2 | 3 |
| 1.0690 <sub>2</sub> | 92.203              | 3        | 3 | 5 | 3 | 0.8975 <sub>4</sub> | 118.23 <sub>8</sub> | 3        | 4 | 6 | 3 | 0.7988 <sub>6</sub> | 149.26 <sub>4</sub> | 5        | 2 | 8 | 3 |
| 1.0690 <sub>2</sub> | 92.203              | 3        | 3 | 3 | 5 | 0.8975 <sub>4</sub> | 118.23 <sub>8</sub> | 3        | 6 | 4 | 3 |                     |                     |          |   |   |   |
| 1.0568 <sub>0</sub> | 93.588              | 9        | 2 | 6 | 2 | 0.8902 <sub>7</sub> | 119.82 <sub>1</sub> | 5        | 1 | 5 | 6 |                     |                     |          |   |   |   |
| 1.0568 <sub>0</sub> | 93.588              | 9        | 6 | 2 | 2 | 0.8902 <sub>7</sub> | 119.82 <sub>1</sub> | 5        | 5 | 1 | 6 |                     |                     |          |   |   |   |
| 1.0449 <sub>9</sub> | 94.976              | 7        | 2 | 4 | 5 | 0.8762 <sub>5</sub> | 123.06 <sub>5</sub> | 3        | 0 | 0 | 8 |                     |                     |          |   |   |   |
| 1.0449 <sub>9</sub> | 94.976              | 7        | 4 | 2 | 5 | 0.8762 <sub>5</sub> | 123.06 <sub>5</sub> | 3        | 0 | 8 | 0 |                     |                     |          |   |   |   |
| 1.0335 <sub>7</sub> | 96.366              | 4        | 3 | 1 | 6 | 0.8694 <sub>8</sub> | 124.73 <sub>2</sub> | 3        | 4 | 0 | 7 |                     |                     |          |   |   |   |
| 1.0335 <sub>7</sub> | 96.366              | 4        | 1 | 3 | 6 | 0.8694 <sub>8</sub> | 124.73 <sub>2</sub> | 3        | 2 | 6 | 5 |                     |                     |          |   |   |   |
| 1.0118 <sub>1</sub> | 99.159              | 2        | 4 | 4 | 4 | 0.8628 <sub>7</sub> | 126.43 <sub>3</sub> | 2        | 1 | 8 | 1 |                     |                     |          |   |   |   |
| 1.0014 <sub>3</sub> | 100.56 <sub>4</sub> | 2        | 6 | 2 | 3 | 0.8628 <sub>7</sub> | 126.43 <sub>3</sub> | 2        | 4 | 7 | 1 |                     |                     |          |   |   |   |
| 1.0014 <sub>3</sub> | 100.56 <sub>4</sub> | 2        | 2 | 6 | 3 | 0.8564 <sub>1</sub> | 128.17 <sub>3</sub> | 3        | 3 | 7 | 3 |                     |                     |          |   |   |   |
| 0.9913 <sub>6</sub> | 101.97 <sub>5</sub> | 5        | 3 | 5 | 4 | 0.8564 <sub>1</sub> | 128.17 <sub>3</sub> | 3        | 7 | 3 | 3 |                     |                     |          |   |   |   |
| 0.9913 <sub>6</sub> | 101.97 <sub>5</sub> | 5        | 5 | 3 | 4 | 0.8500 <sub>9</sub> | 129.95 <sub>5</sub> | 5        | 8 | 0 | 2 |                     |                     |          |   |   |   |
| 0.9816 <sub>0</sub> | 103.39 <sub>4</sub> | 13       | 1 | 1 | 7 | 0.8500 <sub>9</sub> | 129.95 <sub>5</sub> | 5        | 0 | 8 | 2 |                     |                     |          |   |   |   |
| 0.9816 <sub>0</sub> | 103.39 <sub>4</sub> | 13       | 5 | 1 | 5 | 0.8439 <sub>0</sub> | 131.78 <sub>5</sub> | 6        | 8 | 2 | 1 |                     |                     |          |   |   |   |
| 0.9721 <sub>1</sub> | 104.82 <sub>0</sub> | 9        | 6 | 0 | 4 | 0.8439 <sub>0</sub> | 131.78 <sub>5</sub> | 6        | 4 | 2 | 7 |                     |                     |          |   |   |   |
| 0.9721 <sub>1</sub> | 104.82 <sub>0</sub> | 9        | 0 | 4 | 6 | 0.8378 <sub>5</sub> | 133.66 <sub>9</sub> | 3        | 3 | 6 | 5 |                     |                     |          |   |   |   |
| 0.9629 <sub>0</sub> | 106.25 <sub>7</sub> | 6        | 2 | 0 | 7 | 0.8378 <sub>5</sub> | 133.66 <sub>9</sub> | 3        | 5 | 3 | 6 |                     |                     |          |   |   |   |
| 0.9629 <sub>0</sub> | 106.25 <sub>7</sub> | 6        | 6 | 4 | 1 | 0.8261 <sub>4</sub> | 137.62 <sub>8</sub> | 3        | 2 | 2 | 8 |                     |                     |          |   |   |   |

Pattern: PDF 00-039-1425    Radiation: 1.54060    Quality: Star (\*)

|                                                                                                                                                                                                                                                                                                                                                                                                                                                                                                                                                                                                                                                                                                                                                                                              |                   |          |           |              |          |          |          |
|----------------------------------------------------------------------------------------------------------------------------------------------------------------------------------------------------------------------------------------------------------------------------------------------------------------------------------------------------------------------------------------------------------------------------------------------------------------------------------------------------------------------------------------------------------------------------------------------------------------------------------------------------------------------------------------------------------------------------------------------------------------------------------------------|-------------------|----------|-----------|--------------|----------|----------|----------|
| <b>Formula</b> Si O2                                                                                                                                                                                                                                                                                                                                                                                                                                                                                                                                                                                                                                                                                                                                                                         |                   | <b>d</b> | <b>2θ</b> | <b>I fix</b> | <b>h</b> | <b>k</b> | <b>l</b> |
| <b>Name</b> Silicon Oxide                                                                                                                                                                                                                                                                                                                                                                                                                                                                                                                                                                                                                                                                                                                                                                    |                   | 4.03974  | 21.985    | 101          | 1        | 0        | 1        |
| <b>Name (mineral)</b> Cristobalite, syn                                                                                                                                                                                                                                                                                                                                                                                                                                                                                                                                                                                                                                                                                                                                                      |                   | 3.51470  | 25.320    | 2            | 1        | 1        | 0        |
| <b>Name (common)</b>                                                                                                                                                                                                                                                                                                                                                                                                                                                                                                                                                                                                                                                                                                                                                                         |                   | 3.13592  | 28.439    | 9            | 1        | 1        | 1        |
|                                                                                                                                                                                                                                                                                                                                                                                                                                                                                                                                                                                                                                                                                                                                                                                              |                   | 2.84116  | 31.462    | 10           | 1        | 0        | 2        |
|                                                                                                                                                                                                                                                                                                                                                                                                                                                                                                                                                                                                                                                                                                                                                                                              |                   | 2.48740  | 36.080    | 13           | 2        | 0        | 0        |
|                                                                                                                                                                                                                                                                                                                                                                                                                                                                                                                                                                                                                                                                                                                                                                                              |                   | 2.46750  | 36.381    | 5            | 1        | 1        | 2        |
|                                                                                                                                                                                                                                                                                                                                                                                                                                                                                                                                                                                                                                                                                                                                                                                              |                   | 2.34170  | 38.410    | 2            | 2        | 0        | 1        |
|                                                                                                                                                                                                                                                                                                                                                                                                                                                                                                                                                                                                                                                                                                                                                                                              |                   | 2.11791  | 42.656    | 3            | 2        | 1        | 1        |
|                                                                                                                                                                                                                                                                                                                                                                                                                                                                                                                                                                                                                                                                                                                                                                                              |                   | 2.01957  | 44.843    | 3            | 2        | 0        | 2        |
|                                                                                                                                                                                                                                                                                                                                                                                                                                                                                                                                                                                                                                                                                                                                                                                              |                   | 1.92935  | 47.063    | 5            | 1        | 1        | 3        |
|                                                                                                                                                                                                                                                                                                                                                                                                                                                                                                                                                                                                                                                                                                                                                                                              |                   | 1.87147  | 48.611    | 5            | 2        | 1        | 2        |
|                                                                                                                                                                                                                                                                                                                                                                                                                                                                                                                                                                                                                                                                                                                                                                                              |                   | 1.75907  | 51.940    | 2            | 2        | 2        | 0        |
|                                                                                                                                                                                                                                                                                                                                                                                                                                                                                                                                                                                                                                                                                                                                                                                              |                   | 1.73033  | 52.869    | 2            | 0        | 0        | 4        |
|                                                                                                                                                                                                                                                                                                                                                                                                                                                                                                                                                                                                                                                                                                                                                                                              |                   | 1.69221  | 54.156    | 3            | 2        | 0        | 3        |
|                                                                                                                                                                                                                                                                                                                                                                                                                                                                                                                                                                                                                                                                                                                                                                                              |                   | 1.63488  | 56.220    | 2            | 1        | 0        | 4        |
|                                                                                                                                                                                                                                                                                                                                                                                                                                                                                                                                                                                                                                                                                                                                                                                              |                   | 1.61217  | 57.084    | 4            | 3        | 0        | 1        |
|                                                                                                                                                                                                                                                                                                                                                                                                                                                                                                                                                                                                                                                                                                                                                                                              |                   | 1.60131  | 57.507    | 2            | 2        | 1        | 3        |
|                                                                                                                                                                                                                                                                                                                                                                                                                                                                                                                                                                                                                                                                                                                                                                                              |                   | 1.57207  | 58.680    | 2            | 3        | 1        | 0        |
|                                                                                                                                                                                                                                                                                                                                                                                                                                                                                                                                                                                                                                                                                                                                                                                              |                   | 1.56745  | 58.870    | 2            | 2        | 2        | 2        |
|                                                                                                                                                                                                                                                                                                                                                                                                                                                                                                                                                                                                                                                                                                                                                                                              |                   | 1.53356  | 60.304    | 3            | 3        | 1        | 1        |
|                                                                                                                                                                                                                                                                                                                                                                                                                                                                                                                                                                                                                                                                                                                                                                                              |                   | 1.49520  | 62.019    | 3            | 3        | 0        | 2        |
|                                                                                                                                                                                                                                                                                                                                                                                                                                                                                                                                                                                                                                                                                                                                                                                              |                   | 1.43165  | 65.102    | 3            | 3        | 1        | 2        |
|                                                                                                                                                                                                                                                                                                                                                                                                                                                                                                                                                                                                                                                                                                                                                                                              |                   | 1.42102  | 65.650    | 2            | 2        | 0        | 4        |
|                                                                                                                                                                                                                                                                                                                                                                                                                                                                                                                                                                                                                                                                                                                                                                                              |                   | 1.39908  | 66.813    | 2            | 2        | 2        | 3        |
|                                                                                                                                                                                                                                                                                                                                                                                                                                                                                                                                                                                                                                                                                                                                                                                              |                   | 1.36560  | 68.676    | 3            | 2        | 1        | 4        |
|                                                                                                                                                                                                                                                                                                                                                                                                                                                                                                                                                                                                                                                                                                                                                                                              |                   | 1.35277  | 69.420    | 2            | 3        | 2        | 1        |
|                                                                                                                                                                                                                                                                                                                                                                                                                                                                                                                                                                                                                                                                                                                                                                                              |                   | 1.34650  | 69.790    | 2            | 3        | 0        | 3        |
|                                                                                                                                                                                                                                                                                                                                                                                                                                                                                                                                                                                                                                                                                                                                                                                              |                   | 1.33398  | 70.542    | 2            | 1        | 0        | 5        |
|                                                                                                                                                                                                                                                                                                                                                                                                                                                                                                                                                                                                                                                                                                                                                                                              |                   | 1.29976  | 72.690    | 2            | 3        | 1        | 3        |
|                                                                                                                                                                                                                                                                                                                                                                                                                                                                                                                                                                                                                                                                                                                                                                                              |                   | 1.28133  | 73.908    | 2            | 3        | 2        | 2        |
|                                                                                                                                                                                                                                                                                                                                                                                                                                                                                                                                                                                                                                                                                                                                                                                              |                   | 1.23318  | 77.312    | 2            | 2        | 2        | 4        |
|                                                                                                                                                                                                                                                                                                                                                                                                                                                                                                                                                                                                                                                                                                                                                                                              |                   | 1.22375  | 78.020    | 2            | 4        | 0        | 1        |
|                                                                                                                                                                                                                                                                                                                                                                                                                                                                                                                                                                                                                                                                                                                                                                                              |                   | 1.20599  | 79.394    | 2            | 4        | 1        | 0        |
|                                                                                                                                                                                                                                                                                                                                                                                                                                                                                                                                                                                                                                                                                                                                                                                              |                   | 1.18427  | 81.150    | 2            | 3        | 2        | 3        |
|                                                                                                                                                                                                                                                                                                                                                                                                                                                                                                                                                                                                                                                                                                                                                                                              |                   | 1.17576  | 81.862    | 2            | 2        | 1        | 5        |
|                                                                                                                                                                                                                                                                                                                                                                                                                                                                                                                                                                                                                                                                                                                                                                                              |                   | 1.16384  | 82.884    | 2            | 3        | 1        | 4        |
|                                                                                                                                                                                                                                                                                                                                                                                                                                                                                                                                                                                                                                                                                                                                                                                              |                   | 1.15546  | 83.620    | 2            | 3        | 3        | 1        |
|                                                                                                                                                                                                                                                                                                                                                                                                                                                                                                                                                                                                                                                                                                                                                                                              |                   | 1.11050  | 87.840    | 2            | 3        | 3        | 2        |
|                                                                                                                                                                                                                                                                                                                                                                                                                                                                                                                                                                                                                                                                                                                                                                                              |                   | 1.09783  | 89.120    | 2            | 4        | 2        | 1        |
|                                                                                                                                                                                                                                                                                                                                                                                                                                                                                                                                                                                                                                                                                                                                                                                              |                   | 1.09628  | 89.280    | 2            | 1        | 1        | 6        |
| <b>Lattice:</b> Tetragonal<br><b>S.G.:</b> P41212 (92)<br><br><b>Mol. weight =</b> 60.08<br><b>Volume [CD] =</b> 171.24<br><b>Dx =</b><br><b>Dm =</b><br><b>l/lcor =</b> -1.000                                                                                                                                                                                                                                                                                                                                                                                                                                                                                                                                                                                                              |                   |          |           |              |          |          |          |
| <b>a =</b> 4.97320                                                                                                                                                                                                                                                                                                                                                                                                                                                                                                                                                                                                                                                                                                                                                                           | <b>alpha =</b>    |          |           |              |          |          |          |
| <b>b =</b>                                                                                                                                                                                                                                                                                                                                                                                                                                                                                                                                                                                                                                                                                                                                                                                   | <b>beta =</b>     |          |           |              |          |          |          |
| <b>c =</b> 6.92360                                                                                                                                                                                                                                                                                                                                                                                                                                                                                                                                                                                                                                                                                                                                                                           | <b>gamma =</b>    |          |           |              |          |          |          |
| <b>a/b =</b> 1.00000                                                                                                                                                                                                                                                                                                                                                                                                                                                                                                                                                                                                                                                                                                                                                                         | <b>Z =</b> 4      |          |           |              |          |          |          |
| <b>c/b =</b> 1.39218                                                                                                                                                                                                                                                                                                                                                                                                                                                                                                                                                                                                                                                                                                                                                                         |                   |          |           |              |          |          |          |
| Additional Patterns: See PDF 01-082-1404, 01-082-1410, 01-075-0923, 01-076-0935, 01-076-0936, 01-076-0937, 01-077-1315, 01-077-1316 and 01-077-1317. To replace 00-011-0695 and validated by calculated pattern<br>Color: Colorless<br>Polymorphism/Phase Transition: There are a number of other forms of "Si O2"<br>Sample Preparation: Cristobalite was prepared by the Trans Tech Company using Berkeley 5 micron MIN-U-SIL(R). A two kilogram sample was heated at 1600 C for eight hours. The sample was then air quenched, treated with 6N HCl and then jet-milled. The +325 mesh fraction was then removed by sieving<br>Structures: The structure was determined by Peacor (1)<br>Temperature of Data Collection: Pattern taken ~298 K<br>Unit Cell Data Source: Powder Diffraction |                   |          |           |              |          |          |          |
| <b>Structure</b><br>Publication: Z. Kristallogr., Kristallgeom., Kristallphys., Kristallchem.<br>Detail: volume 138, page 274 (1973)<br>Authors: 1. Peacor, D.<br>Primary Reference<br>Publication: ICDD Grant-in-Aid<br>Authors: Wong-Ng, W., McMurdie, H., Paretzkin, B., Hubbard, C., Dragoo, A., NBS, Gaithersburg, MD, USA.                                                                                                                                                                                                                                                                                                                                                                                                                                                             |                   |          |           |              |          |          |          |
| <b>Radiation:</b> CuKα1                                                                                                                                                                                                                                                                                                                                                                                                                                                                                                                                                                                                                                                                                                                                                                      | <b>Filter:</b> M  |          |           |              |          |          |          |
| <b>Wavelength:</b> 1.54060                                                                                                                                                                                                                                                                                                                                                                                                                                                                                                                                                                                                                                                                                                                                                                   | <b>d-spacing:</b> |          |           |              |          |          |          |
| <b>SS/FOM:</b> 83.3 (0.01,36)                                                                                                                                                                                                                                                                                                                                                                                                                                                                                                                                                                                                                                                                                                                                                                |                   |          |           |              |          |          |          |
